# Supplementary material for: Trends in avoidable mortality over the life course in Mexico, 1990–2015: a cross-sectional demographic analysis
Source: PubMed Central journal article supplement — BMJ Open. 2018 Aug 1;8(7):e022350. doi: 10.1136/bmjopen-2018-022350 (PMC6074636; doi:10.1136/bmjopen-2018-022350), 2018-08-01
Supplement: bmjopen-2018-022350.draft_revisions.pdf [file bmjopen-2018-022350.draft_revisions.pdf]

# BMJ Open

BMJ Open is committed to open peer review. As part of this commitment we make the peer review history of every article we publish publicly available.

When an article is published we post the peer reviewers' comments and the authors' responses online. We also post the versions of the paper that were used during peer review. These are the versions that the peer review comments apply to.

The versions of the paper that follow are the versions that were submitted during the peer review process. They are not the versions of record or the final published versions. They should not be cited or distributed as the published version of this manuscript.

BMJ Open is an open access journal and the full, final, typeset and author-corrected version of record of the manuscript is available on our site with no access controls, subscription charges or pay-per-view fees (<http://bmjopen.bmj.com>).

If you have any questions on BMJ Open's open peer review process please email [info.bmjopen@bmj.com](mailto:info.bmjopen@bmj.com)

# BMJ Open

## Inequalities in lifespan in Mexico, 1990-2015: deterioration in adult survival

|                               |                                                                                                                                                                                                                                                                                             |
|-------------------------------|---------------------------------------------------------------------------------------------------------------------------------------------------------------------------------------------------------------------------------------------------------------------------------------------|
| Journal:                      | <i>BMJ Open</i>                                                                                                                                                                                                                                                                             |
| Manuscript ID                 | bmjopen-2018-022350                                                                                                                                                                                                                                                                         |
| Article Type:                 | Research                                                                                                                                                                                                                                                                                    |
| Date Submitted by the Author: | 14-Feb-2018                                                                                                                                                                                                                                                                                 |
| Complete List of Authors:     | Aburto, José Manuel; Syddansk Universitet Det Sundhedsvidenskabelige Fakultet, Biodemography Unit, Department of Public Health<br>Riffe, Tim; Max-Planck-Institut für Demografische Forschung<br>Canudas-Romo, Vladimir; Australian National University College of Arts and Social Sciences |
| Keywords:                     | health inequality, adult health, causes of death, mortality, homicides, cardiovascular diseases                                                                                                                                                                                             |
|                               |                                                                                                                                                                                                                                                                                             |

SCHOLARONE™  
Manuscripts

Peer Review Only

Aburto, Riffe, Canudas-Romo Health inequalities in Mexico

**Title: Inequalities in lifespan in Mexico, 1990-2015: deterioration in adult survival**

**Authors:** José Manuel Aburto, *PhD student (JMA)*<sup>a\*\*†</sup>, Tim Riffe, *Research Scientist (TR)*<sup>b†</sup> & Vladimir Canudas-Romo, *Associate Professor (VCR)*<sup>c</sup>

**Author affiliations:**

<sup>a</sup> Institute of Public Health-Unit of Biodemography, University of Southern Denmark, Odense 5000, Denmark.

<sup>b</sup> Max Planck Institute for Demographic Research, Rostock 18057, Germany

<sup>c</sup> School of Demography, Australian National University, ACT 0200, Australia

<sup>†</sup> These authors contributed equally to the paper

\*The manuscript's guarantor.

**Corresponding author:** José Manuel Aburto: [jmaburto@health.sdu.dk](mailto:jmaburto@health.sdu.dk), T: +45 65509416

*The Corresponding Author has the right to grant on behalf of all authors and does grant on behalf of all authors, an exclusive licence (or non exclusive for government employees) on a worldwide basis to the BMJ Publishing Group Ltd to permit this article (if accepted) to be published in BMJ editions and any other BMJ PGL products and sublicences such use and exploit all subsidiary rights, as set out in our licence.*

Aburto, Riffe, Canudas-Romo Health inequalities in Mexico

**Keywords** health inequalities, adult health, causes of death, mortality

### Abstract

**Objective:** To quantify the effect of medically amenable conditions, diabetes, ischemic heart diseases, lung cancer, cirrhosis, homicides and road traffic accidents on longevity in Mexico during 1990-2015.

**Design:** Retrospective demographic analysis using publicly available aggregated data.

**Setting:** Vital statistics from the Mexican civil registration system.

**Participants:** 64 populations (32 Mexican-states by sex) with data on causes of death.

**Main outcome measures:** Cause-specific contributions to the gap in life expectancy in three age groups (0-14, 15-49 and 50-84) with a low-mortality benchmark based on the lowest observed mortality in Mexico.

**Results:** The population below age 15 shows improvements in survival. Average survival below 15 over states was 14.82 (95% confidence interval, 14.76 to 14.88) and 14.78 years (14.70 to 14.86) in 2015, for females and males respectively. However, the adult population aged 15 to 49 shows deterioration among males after 2006 in almost every state due to an increase in homicides and a slow recovery thereafter. Out of 35 potential years, females and males live on average 34.57 (34.48 to 34.67) and 33.80 (33.34 to 34.27), respectively. Adults aged 50 to 84 show an unexpected decrease in the low mortality benchmark, indicating nationwide deterioration in both females and males with average survival of 28.59 (27.43 to 29.75) and 26.52 (25.33 to 27.73) out of 35, respectively. State gaps from the benchmark were mainly caused by ischemic heart diseases, diabetes, cirrhosis and homicides. We find large health disparities between states, particularly for the adult population after 2005.

**Conclusions:** Mexico has succeeded in reducing mortality and between-state inequalities in children. However, the adult population is becoming vulnerable as it has not been able to reduce the burden of conditions amenable to health services and violence. This has led to large health disparities between Mexican states in the last 25 years.

#### Strengths and limitations of this study

- In the second half of the twentieth century Mexico experienced great progress in reducing mortality at early ages, but homicides rates more than doubled after 2005.
- We introduce a methodology to quantify the impact of medically amenable mortality and behavior related conditions on life expectancy relative to a low mortality benchmark.
- We analyze patterns in life expectancy for different age groups over time (1995-2015) and simultaneously account for changes in causes of death and inequality between states that have undergone major social and public health transitions.
- Mortality data from Mexico are likely to present inaccuracies in cause-of-death classification due to comorbidities, particularly at older ages.
- Our estimates regarding homicide mortality are likely to be underestimated due to inaccurate practices regarding counting, reporting, and due to the large number of missing individuals in Mexico

Aburto, Riffe, Canudas-Romo Health inequalities in Mexico

## Introduction

The second half of the 20th century was marked by sizable improvements in mortality, living conditions, and health in most Latin American countries.<sup>1</sup> In Mexico, these improvements have slowed down recently due to opposing trends in particular causes of death. For instance, homicide and diabetes increased during the first decade of the 2000's, even as infectious and respiratory diseases continued to fall over the same period. While life expectancy at birth increased by 4.3 years for males (from 67.6 to 71.9) and 3.4 years for females (from 73.8 to 77.2) between 1990 and 2000,<sup>2</sup> between 2000 and 2010, life expectancy at birth entered into a period of stagnation for males and slowed progress for females.<sup>3</sup>

This period coincides with ongoing public health interventions, such as the Universal Vaccination Program and established health systems (IMSS, ISSSTE), and with the implementation of a Universal Health Coverage program (*Seguro Popular*). The latter program provides primary and secondary health care to the uninsured population and allocates funds to cover catastrophic health expenditures.<sup>4</sup> Further, since 1997 conditional cash transfer programs were introduced to supply incentives for poor families to invest in education, health, and nutrition.<sup>5</sup> Some evidence suggests that Mexico experienced substantial decreases in infant and child mortality, and in the prevalence of acute malnutrition between 1980 and 2000 thanks partially to these interventions.<sup>6</sup> Similarly, by 2012 *Seguro Popular* had provided health insurance coverage to an additional 52 million people in Mexico (or 44.4% of the population), leading to increased access to public health care and protection from the financial consequences of disease.<sup>7</sup>

Conditional cash transfers have focused on the poorest states, and *Seguro Popular* was introduced at different times in different states across the country. Although these actions underscore broad progress in public health interventions, they mask disparities between Mexican states and the epidemiological patterns for different age groups. For instance, Mexico faces a rapid aging process in which the interaction between infectious diseases and noncommunicable conditions can be anticipated in the adult population.<sup>8</sup> Therefore, it is necessary to assess the varied impacts that these interventions may have had on mortality in Mexican states at different ages.<sup>9</sup>

One approach to approximate the impact of health care and other interventions, and to reveal potential areas of improvement is by operationalizing the concept of Avoidable or Amenable Mortality (hereafter abbreviated AM).<sup>10 11</sup> This categorization of mortality aims to measure the quality of health service systems by selecting certain causes of death that should not occur in the presence of effective and timely health care. Therefore, improvements in AM mortality are expected over time, as has been observed in several countries. For example, among 19 industrialized countries, including 14 countries from Western Europe, USA, Canada, Australia, New Zealand and Japan, a reduction in AM rates was observed over the past 20 years.<sup>10</sup> Avoidable mortality rates fell, on average, by 17% for males and 14% for females in these countries between 1997 and 2003. However, the USA lagged behind the other countries in this group, while Japan, France and Australia were the top performers. Despite mortality reductions from cancers and

Aburto, Riffe, Canudas-Romo Health inequalities in Mexico

1  
2  
3 circulatory diseases for both sexes, disparities between countries persist, with the United States  
4 showing the smallest reductions (around 5%) for both sexes.<sup>10</sup>  
5  
6

7 In Mexico, the components of avoidable mortality had different trends since the late 1990's.  
8 Mortality from infectious diseases and nutrition-related conditions decreased between 2000  
9 and 2004,<sup>12</sup> while deaths related to diabetes and ischemic heart diseases increased in the first  
10 decade of the 2000s.<sup>13</sup> Importantly, increases in the latter causes of death were concentrated in  
11 the poorest states of the country.<sup>13</sup>  
12  
13

14 We extend previous analyses by using the most recent available data to study mortality trends  
15 by cause of death for all 32 Mexican states, by sex, and over the full period from 1990 to 2015.  
16 This choice of period covers several public health interventions and captures several major  
17 trends in state and cause-of-death variation. We further segment AM into health intervention-  
18 related and behavior-related AM causes that capture the epidemiological patterns of Mexico.<sup>14</sup>  
19 In addition, our work differentiates from earlier studies by comparing state mortality patterns  
20 with an easy-to-understand low-mortality benchmark calculated for large age groups (i.e. 0-14,  
21 15-49 and 50-84). This concept has been previously used in mortality studies.<sup>15-17</sup> Deviations  
22 from the low-mortality benchmark indicate a strong potential for improvement.  
23  
24  
25

26 We hypothesize age-dependent variations in mortality outcomes. In particular, we expect con-  
27 vergence between states and improvement in survival for young people, since public health  
28 interventions are mainly focused on infant and child health. For instance, the vaccination pro-  
29 gram and *Seguro Popular* aim to fully cover children in the entire country, and recent evidence  
30 suggests a decrease in mortality below age 15 due to a decline in infectious and respiratory dis-  
31 eases.<sup>18</sup> On the contrary, we expect little improvement in survival for the young-adult popula-  
32 tion due to the sudden and egregious rise in homicide mortality.<sup>19</sup> We foresee health deteriora-  
33 tion among older adults due to documented increases in diabetes mortality.<sup>18</sup> Although every  
34 state has the commitment to provide universal coverage and equitable access to health care,  
35 we anticipate disparities in mortality improvements between states due to heterogeneous epi-  
36 demiological transitions among states,<sup>20</sup> and differences in how health care programs have been  
37 delivered to the population.<sup>21</sup>  
38  
39  
40  
41  
42  
43

## 44 **Data sources & methods**

45  
46 Our analyses are based on publicly available anonymized datasets. We used death register mi-  
47 crodata files produced by the Mexican Statistical Office (INEGI) for years 1990 to 2015.<sup>22</sup> From  
48 these data, information on causes of death by single age, sex, and state of residence at the time  
49 of death was extracted. Population estimates from 1990 to 2015 came from the Mexican Popu-  
50 lation Council (CONAPO).<sup>23</sup> These population estimates adjust for age misstatement, under-  
51 counting, and interstate and international migration. Death counts and estimates of the popula-  
52 tion exposed to risk were used to calculate cause-age-specific death rates by sex for each state  
53 from 1990 to 2015.  
54  
55  
56  
57  
58  
59  
60

Aburto, Riffe, Canudas-Romo Health inequalities in Mexico

### *Classification of Causes of Death*

To classify deaths we use the concept of “Avoidable/Amenable” Mortality (AM).<sup>10 11</sup> We group causes of death into eight categories based on previous classifications that has recently been adapted to the case of Mexico.<sup>14</sup> The first category refers to those conditions that are susceptible to medical intervention, such as infectious and respiratory diseases, some cancers and circulatory conditions, and birth conditions, among others. It is labeled “Causes amenable to medical service”. We separate diabetes, ischemic heart diseases (IHD), lung cancer, and cirrhosis as sub-categories of AM because these causes are susceptible to both health behavior and medical service, and because the first two represent major causes of death in Mexican adults.<sup>20</sup> Likewise, we separate homicide and road traffic accidents because they have emerged as leading causes of death among young people, and the first one recently had a sizeable impact on life expectancy in Mexico<sup>14</sup>. Remaining causes were grouped into a single category labeled “Other causes”.

Death data were originally classified according to the International Classification of Diseases (ICD), revision 9 for years 1990 to 1997 and revision 10 for 1998 to 2015 (see Additional file 1 Table 1 for details on ICD codes for each category). To check the validity of these cause-of-death codes in Mexico, we performed a sensitivity analysis and did not find major ruptures in mortality trends by AM classification (See Additional file 1, Figure 1).

Comorbidity in the old age population has increased in Mexico.<sup>24</sup> As a result inaccuracies may arise in cause of death registration due to problems associated with medical diagnosis, and selection and coding of the main cause of death. Although analyses in these ages should consider multiple causes of death to better represent old age mortality, it is out of the scope of this study since we focus on the primary cause of death. We truncate our analysis at age 85 to avoid misinterpreting results related to inaccurate cause of death coding practices.

### *Age groups*

We calculate life expectancy in three large age groups to capture mortality differences along the life course. Life expectancy in each age group simply refers to the average years of life lived between two ages conditional on survival to the lower age bound. This measure is also known in demographic analysis as temporary life expectancy.<sup>25</sup> The first age group refers to people aged 0-14. This group is likely to represent improvements in causes amenable to medical service (e.g. infectious diseases and conditions of perinatal period).<sup>3</sup> The second group, aged 15-49, is used to capture the effect of homicide mortality and external causes historically related to the young-adult mortality hump, as well as maternal mortality for women.<sup>26</sup> This age group had an important impact on changes in state life expectancy in the first decade of the 2000s.<sup>14</sup> The third group covers older adults aged 50-84; with similar life expectancy (ages 40-84) used for international cancer comparisons.<sup>27</sup> Older adults are likely to represent a vulnerable group due to deterioration in non-communicable diseases and injury-related mortality in recent years.<sup>20 28</sup>

### *Low mortality benchmark*

Aburto, Riffe, Canudas-Romo Health inequalities in Mexico

Our low-mortality benchmark is calculated on the basis of the lowest observed mortality rates over all states by age, year, cause, and sex. Subsequently, life expectancies are calculated with these rates. This represents the highest potentially achievable life expectancy from the aggregated low mortality profiles. This benchmark is a practical reference because it is based neither on a projection of improvements into the future nor on an arbitrary and likely dissimilar population. The resulting minimum mortality rate schedule has a unique age profile, and it determines our benchmark temporary life expectancy. It can be treated as the best presently achievable mortality assuming perfect diffusion of the best available practices and technologies in Mexico.<sup>17</sup>

### Methods

Cause-specific death rates are the basis of all calculations in this work. To mitigate random variations, these rates are adjusted in two steps. First, we smooth cause-specific death rates over age and time for each state and sex separately using a 2-d p-spline.<sup>29</sup> Second, we rescale the smoothed cause-specific death rates to sum to the raw all-cause death rates for each sex and state. Period life tables up to age 84 for males and females from 1990 to 2015 and their benchmarks were calculated following standard demographic methods.<sup>30</sup> Temporary life expectancies were calculated<sup>25</sup>(see Additional file 1 for a technical overview) and cause-specific contributions to the difference between each state and the low mortality benchmark were estimated using standard decomposition techniques.<sup>31</sup> Finally, the coefficient of variation of the gap between temporary life expectancy in each age group with the low mortality benchmark was calculated to measure the level of disparity between states over time. This indicator is relative and has the property that even if temporary life expectancy refers to different age-ranges, i.e. 0-14, 15-49, and 50-84, the values are still comparable over age-groups and time. In addition, we performed two-way ANOVA and post hoc tests to analyze disparities in temporary life expectancy between states and age groups in Mexico.

### Patient involvement

No patients were involved in setting the research question, outcome measures, design of the study. No patients were asked to advise on the interpretation of the results and there are no plans on disseminating the results of this research to study participants or the relevant patient community.

### Results

#### *Trends in life expectancy for Mexican states by age-groups*

Figure 1 presents the temporary life expectancies by state for three large age groups: the youngest (ages 0-14), young adults (15-49) and older adults (50-84), over the period 1990-2015. Grey lines refer to each of the 32 states; the black lines represent the average over states; and the blue lines represent the low mortality benchmark. The black line at the top of each panel indicates the maximum livable years in each age group: 15 for the youngest, and 35 for young and older adults conditional on surviving to ages 15 and 50, respectively. Any gap between a



Aburto, Riffe, Canudas-Romo Health inequalities in Mexico

state line and the blue line represents potential additional years of life if mortality were to achieve the low mortality benchmark.

All states show improvements in the youngest age group since 1990, approaching the low mortality benchmark, which itself is very close to maximum survival below age 15. This was observed even in the southern states such as Puebla, Chiapas and Tabasco which have lagged in reducing mortality at these ages throughout the entire period.

Life expectancy between ages 15 and 49 shows a sudden drop after 2005 among males in almost every state in Mexico. In 2005, young males in this age group had a temporary life expectancy of 33.9 years (95% CI, 33.5 to 34.2) averaged over states. By 2010, the number of states below this level had increased from 14 to 23. Chihuahua, Sinaloa and Durango, in the northern region, experienced a substantial mortality shock in 2010 in this age group, and consequently recorded the largest departures from the low mortality benchmark. In 2015, the state average (33.8 years, 33.3 to 34.3) had almost recovered to its 2005 level. Trends for females are closer to the low mortality benchmark.

Among older adults, life expectancy between ages 50 and 84 shows stagnation and deterioration over the entire period of observation. Even the low mortality benchmark exhibits a gradual downward trend, pointing to a generalized mortality increase. The female state average life expectancy declined from 28.8 years (27.4 to 30.2) in 1990 to 28.3 years (27.4 to 29.2) in 2010. By 2015, this average only managed to recover to 28.6 years (27.4 to 29.8). Among males, the average over states decreased from 26.7 years (24.7 to 28.8) in 1990 to 26.3 years (24.9 to 27.6) in 2010, and 26.5 years (25.3 to 27.7) in 2015. Furthermore, we fitted three linear models to both sexes, combined and independently, and the slope coefficient was significant in all of them at the level of  $p < .005$ . These results suggest that the decline observed was significant. As with young adult males, some states experienced deterioration after 2005, with a minor recovery since 2010.

[Figure 1 about here]

#### *Health disparities between states and age groups*

Figures 2-5 show results for males because they exhibit the largest departures from the low mortality benchmark and higher inequality. However, results for females are shown in the Additional file 1.

Figure 2 shows trends in inequalities between states in Mexico for males in the three age groups, as measured by the coefficient of variation (results for females are reported in Additional file 1, Figure 2). This indicator measures the variation in the gap of temporary life expectancy with the low mortality benchmark between states within the three age groups. Larger values are related to higher disparities between states. Trends show mixed patterns of convergence with temporary divergence, and with females in all cases showing less between-state inequality than males over the entire period studied.

Aburto, Riffe, Canudas-Romo Health inequalities in Mexico

1  
2  
3  
4  
5  
6  
7  
8  
9  
10  
11  
12  
13  
14  
15  
16  
17  
18  
19  
20  
21  
22  
23  
24  
25  
26  
27  
28  
29  
30  
31  
32  
33  
34  
35  
36  
37  
38  
39  
40  
41  
42  
43  
44  
45  
46  
47  
48  
49  
50  
51  
52  
53  
54  
55  
56  
57  
58  
59  
60

There are important differences in inequality levels and trends between age groups. Since 1990, state inequality in life expectancy in the youngest age group has been decreasing. Among females, young adults show even lower values than the population in the youngest age group. However, for males in the young adult age-group a crossover in the early 2000's is seen, with the coefficient of variation increasing after 2005. The highest values are observed in the period 2009-2011. By 2015, state inequalities among young adults had decreased substantially, but still remain higher than that of the youngest age group. Older adults show substantially higher inequality than the other age groups over the entire period studied, but also show steady convergence between states. From 2013, both males and females show a potential rise in disparities between states, although could be random variation since it only accounts for 2 years (Additional file 1 Figure 2).

[Figure 2 about here]

To illustrate discordance between age groups within each state, Figure 3 shows the state ranking of temporary life expectancy for the years 2010-15 for males in each age group (see Additional file 1, Figure 3 for females' results). States at the top show the highest values in temporary life expectancy, while states in the bottom refer to the lowest values. We chose to highlight the states with most discordant age-rankings. Green and purple lines refer to selected states that show drastic changes in the ranking between different age groups. For example, Sinaloa, in the northern part of Mexico, holds the record life expectancy below age 15; however, young adults (15-49) show one of the lowest values, while older adults are in the sixth position out of 32. Similar trajectories are shown with green lines for Nayarit and Michoacán in the central region, Zacatecas in the North, as well as Morelos and Guerrero from the southern region. Conversely, the pattern of age discordance in Hidalgo, Querétaro and Mexico City from the central region, and Yucatan and Puebla in the South (purple lines) is summarized by changing from a low rank in the youngest age group to a high rank in young adults, followed by low rank in older adults.

We performed a two-way ANOVA on temporary life expectancy by state and age-groups controlling for year. There was a statistically significant interaction between the effects of states and age groups [ $F=12.25$ ,  $p < .001$ ] indicating, as shown in Figure 3, that part of the existing variation in the country is due to within-variability in each state. There were also significant differences in temporary life expectancy between age groups [ $p < .001$ ] and states [ $p < .001$ ] reflecting between-state variability, as shown in Figure 2.

[Figure 3 about here]

*Cause-decomposition analysis*

Aburto, Riffe, Canudas-Romo Health inequalities in Mexico

1  
2  
3 In Figures 4 and 5, the Mexican states in each region are arranged according to the largest gap  
4 with the low mortality benchmark among older adult males in 2015. Figure 4 shows how causes  
5 amenable to medical service, diabetes, ischemic heart diseases (IHD), lung cancer, cirrhosis,  
6 homicide, and road traffic accidents contributed to the gap between each state and the low  
7 mortality benchmark from 1990 to 2015 for male older adults (ages 50-84). These are the caus-  
8 es of death that contributed the most to holding states back from achieving the low mortality  
9 benchmark. Light-yellow colors indicate negligible contributions, which means that are very  
10 close to the low mortality benchmark within each category. Darker red hues indicate larger con-  
11 tributions to the gap. If a particular state is improving during the period, it shows a transition  
12 from red to light-yellow.  
13  
14  
15

16 Medically amenable causes of death show gradual improvements in most states from 1990 to  
17 2015, bringing them closer to the benchmark in this category. However, large disparities be-  
18 tween states and potential for improvements remain. For example, Baja California, Sonora, Chi-  
19 huahua and Coahuila from the northern region show substantial contributions to the gap. Dia-  
20 betes mortality has increasingly contributed to widening the benchmark gap in several states,  
21 including Coahuila and Tamaulipas in the North, Mexico City, Guanajuato, Mexico state and  
22 Tlaxcala in the central region, and Puebla, Veracruz and Tabasco in the South. Similarly, IHD sig-  
23 nificantly affects the northern part of the country, while cirrhosis is mostly concentrated in the  
24 South. Lung cancer and road traffic accidents have lower contributions to the benchmark gap,  
25 but these remain important causes of death. Homicides increased the gap in this age group in  
26 some states after 2005, such as Chihuahua, Durango and Sinaloa in the North, Colima, Michoa-  
27 cán and Nayarit in the central region, and Guerrero in the South.  
28  
29  
30  
31

32 [Figure 4 about here]  
33  
34

35 Females show similar regional patterns to males, albeit of lower magnitude. For males, causes  
36 amenable to medical service, diabetes, and IHD contributed the largest share to the gap with  
37 the low mortality benchmark among older adult females. In the youngest age group, improve-  
38 ments in life expectancy and in reducing the gap with the low mortality benchmark were mainly  
39 driven by causes amenable to medical service among both females and males. Finally, homicide  
40 mortality and road traffic accidents are the main drivers of the gap with the benchmark among  
41 young male adults (ages 15-49). Importantly, homicides contributed more than 2.5 years to the  
42 gap with the low mortality benchmark in 2010 in the northern state of Chihuahua, and several  
43 states from the North and South of Mexico showed substantial impacts from homicide after  
44 2005. Results for all age-groups are shown in Additional file 1, Figures 4-9.  
45  
46  
47  
48

#### 49 *Potential gains and causes of death in 2015*

50  
51

52 Figure 5 breaks down the state-specific low mortality benchmark gap for males aged 50-84 into  
53 potential gains and their cause of death composition. The left panel shows the potential gains  
54 for older adults if the low mortality benchmark were achieved for each state in 2015. The right  
55 panel shows the proportion of potential gains due to specific causes of death in the same year.  
56  
57

Aburto, Riffe, Canudas-Romo Health inequalities in Mexico

1  
2  
3  
4 Every state in Mexico could increase survival by at least one year in older adult ages if they were  
5 to achieve the low mortality benchmark. However, for 17 of them the gap with the benchmark  
6 is higher than 2 years, and for 3 states in the northern region it is greater than 3 years. For fe-  
7 males, with the exception of Sinaloa and Nayarit, all the states show the potential to gain over  
8 an additional year of life between ages 50-84.  
9  
10

11 More than half of these potential gains in life expectancy between ages 50 and 84 are due to  
12 medically amenable causes, diabetes, IHD, and cirrhosis in every state in Mexico (right panel).  
13 This is true also for females. Although older males show lower impact of homicide mortality on  
14 potential gains compared to young adult males (15-49), its effect is present in almost every  
15 state, particularly in Guerrero, Morelos in the South, Nayarit and Colima in the central region,  
16 and Sinaloa in the North. Results for all the age groups for the years 2005, 2010, and 2015 are  
17 shown in the Additional file 1, Figures 10-18.  
18  
19  
20

21 [Figure 5 about here]  
22  
23

## 24 Discussion

25  
26 In Mexico since 1990, life expectancy in three large age groups has followed discordant patterns  
27 of rise, stagnation, and deterioration. Such patterns have been driven mainly by causes of death  
28 that are amenable to medical service (such as infectious and respiratory diseases) and health  
29 behaviors (such as homicides, diabetes, IHD, and cirrhosis) as subcategories of the broader con-  
30 cept of Avoidable/Amenable mortality (AM). Patterns in these two large cause-of-death catego-  
31 ries led to contrasting levels of inequality in the country.  
32  
33  
34

35 Life expectancy below age 15 converged towards the low mortality benchmark and maximum  
36 survival in all 32 Mexican states. These results underscore public health interventions aimed at  
37 youngest ages. This is supported by evidence that vaccination coverage has been achieved for  
38 the entire young population, and that health insurance coverage has improved, due to vaccina-  
39 tion programs and the implementation of *Seguro Popular* along with previous established  
40 health systems, respectively.<sup>9</sup> Causes amenable to medical service are at the heart of such im-  
41 provements, consisting of decreases in infectious and respiratory diseases associated with pub-  
42 lic health interventions targeting children.<sup>6</sup> For example, Puebla and Tlaxcala (in the South and  
43 central regions respectively) were the states with the lowest life expectancy below age 15 in  
44 1990 and have improved by more than half a year since then. Moreover, the average over  
45 states improved from 14.5 in 1990 to 14.8 in 2015, with no state below 14.7. As a result of con-  
46 tinuous and nationwide convergence towards the low mortality benchmark, inequalities be-  
47 tween states in life expectancy below age 15 have been reduced.  
48  
49  
50  
51

52 Opposing the optimistic trend in the under-15 population, increases in homicide mortality re-  
53 versed gains in male life expectancy, particularly between ages 15-49. These results are con-  
54 sistent with previous studies quantifying the effect of homicide mortality on the stagnation of  
55 national life expectancy at birth in the first decade of the 21st century,<sup>3</sup> and with the reversal  
56  
57  
58  
59  
60

Aburto, Riffe, Canudas-Romo Health inequalities in Mexico

1  
2  
3 experienced in life expectancy in most states between 2005 and 2010.<sup>14</sup> Our results extend such  
4 findings by adding five years of data and segmenting by specific age groups. We found that after  
5 ten years of the unexpected rise in homicide mortality, most states have experienced a slow and  
6 partial recovery since 2010. However, the impact of homicide is still higher than the levels ob-  
7 served in 2005. Between 2010 and 2015, this cause of death accounted for most of the gap be-  
8 tween states and the low mortality benchmark in ages 15-49. For this age group, the states that  
9 show the greatest benchmark gap for homicide in 2015 are Guerrero in the South, and Sinaloa  
10 and Chihuahua in the North, which could gain one year, and half a year (each) respectively if  
11 homicides were reduced to the level of the southern state of Yucatán, which in this case makes  
12 up 100% of the benchmark. Moreover, health inequalities in life expectancy between states  
13 followed the rise in homicides after 2005 (Figure 2), and the considerable discordance between  
14 age-groups (Figure 3) was likely due in great part to homicide mortality in ages 15-49. It is un-  
15 clear how these levels of state life expectancy will change with the new reports which highlight  
16 a three year increase in homicide in Mexico.<sup>22,ii</sup>

21  
22 The population aged 50-84 shows the largest low mortality benchmark gap in both females and  
23 males. Out of 35 livable years in this age group, females lived on average 28.6 years and males  
24 26.5 in 2015 without any clear improvement in the 26 years since 1990. Even the low mortality  
25 benchmark itself shows a downward trend for males and females (Figure 1). Moreover, this age  
26 group exhibits the highest inequality between states in the last 26 years. Our results show that  
27 causes of death holding states back from the low mortality benchmark vary between regions.  
28 Causes amenable to medical service showed gradual improvements in almost every state since  
29 1990. However, in some states of the northern region such as Baja California, Sonora, and Chi-  
30 huahua, these causes of death still show large room for improvements among older adults. Dia-  
31 betes, Ischemic Heart Diseases (IHD) and cirrhosis account for the majority of the gap with the  
32 benchmark mortality with large regional differences. For example, IHD is mostly concentrated in  
33 the North (Figure 4), while cirrhosis and diabetes show a stronger impact in the central and  
34 southern regions. These results are supported by previous evidence documenting an increase in  
35 adult mortality rates from chronic kidney disease, diabetes, and cirrhosis since 2000.<sup>20</sup> Lung  
36 cancer and homicides had a lower impact on life expectancy for this age group, and both are  
37 higher in the northern part of the country.

### 42 **Strengths and limitations of the study**

43 The methodology we performed enables to measure the impact of medically amenable mortali-  
44 ty and behavior-related mortality on life expectancy relative to a low mortality benchmark in  
45 three large age groups. It allows to analyze patterns in life expectancy for different age groups  
46 over time and simultaneously account for changes in causes of death and inequality between  
47 populations that have undergone major social and public health transitions. Therefore, it is im-  
48 perative to consider the effect of different causes of death to estimate the effectiveness of pub-  
49 lic health and policy interventions.

53 The limitations of our study should be mentioned. First, Mortality data from Mexico are likely to  
54 present inaccuracies in cause-of-death classification due to comorbidities, particularly at older  
55 ages.<sup>32</sup> To mitigate this, we focus on ages below 85 and broad groups of causes of death. In ad-  
56

Aburto, Riffe, Canudas-Romo Health inequalities in Mexico

dition, road traffic accidents and homicides may happen not in the place of residence but in another state, which might cause differences in state specific mortality. Moreover, our estimates regarding homicide mortality are likely to be underestimated due to inaccurate practices regarding counting, reporting, and due to the large number of missing individuals in Mexico.<sup>33 34</sup>

Similarly, in 1997 a change in diagnosis criterion for diabetes took place, and this could have an impact on trends of mortality caused by diabetes in years adjacent to 1997.<sup>35</sup>

Avoidable mortality should be understood as an indicator of potential weaknesses with respect to health care and some public health policies and not as a definitive assessment.<sup>10</sup> The amount of deaths that should be considered within the avoidable classification is not clear<sup>36</sup>. For instance, some researchers consider only 50 percent of heart disease mortality to be avoidable.<sup>37</sup><sup>38</sup> There is no direct information to precisely measure percentages of avoidable mortality within cause groups in Mexico. Nonetheless, the difference between a given mortality schedule and the best mortality schedule of the same year can be conceived of as a minimal definition of avoidable mortality. The benchmark mortality schedule sets a lower bound to how much mortality could have been avoided. Certainly, even the best mortality schedule will contain elements of mortality that most would consider avoidable. To the extent that the components of the benchmark schedule were indeed attained somewhere in Mexico, one can view any excess mortality with respect to the benchmark schedule as avoidable. We believe this perspective improves on the AM concept by giving a directly measurable standard against which to estimate avoidable deaths.

### Implications of findings

Beyond the mortality implications of the rise in homicide, violence has had a toll on perceived vulnerability in the country.<sup>39</sup> The recent increase in homicides in some states could trigger an increase in the perception of vulnerability, which would result in a higher average lifetime fear in specific states. Although we are not able to link the trends in mortality among young adults in Mexico with specific public policies, some evidence suggests that the propagation of homicide mortality is not only a result of the war between drug cartels, but also because of the implementation of specific policies aimed to mitigate drug cartel operations after 2006.<sup>40</sup> There is no simple way to lessen the impact of homicide mortality, but it is clear that the government has not been able to reduce its burden back to levels observed before 2005. Furthermore, state homicide rates may underestimate the effect of violence in particular localities. For example, Guerrero in the South, has two of the most dangerous cities in the world,<sup>iii</sup> but no information is available on the heterogeneity in homicide mortality for the rest of the state.

The fact that in 2015 the older adult population of Mexico could add more than one year of life in every state for males, and in 30 states for females by achieving the benchmark mortality levels, underscores vulnerability in these ages. Public health interventions targeting specific causes of death for this age group according to the epidemiological profile of each state would not only increase life expectancy, but it would also forge a path towards more equality between states in

Aburto, Riffe, Canudas-Romo Health inequalities in Mexico

health outcomes. More than 50% of the potential gains in life expectancy between ages 50 and 84 are due to avoidable mortality, and to a large extent mortality related to health behaviors and medically amenable causes. For instance, obesity and overweight, risk factors for diabetes and IHD, have dramatically increased since the 1990s in developing countries because of the consumption of cheap, energy-dense food and reduced physical activities.<sup>41</sup> In this sense, Mexico, along with the USA, has the highest rates of overweight and obesity among all OECD countries<sup>18</sup> and one of the highest in Latin America, along with Chile, El Salvador, Honduras, and Paraguay.<sup>42</sup> However, obesity prevalence is not homogeneous across Mexico. The highest rates of obesity are concentrated in the northern and central regions<sup>18</sup> and in urban areas of the country,<sup>43</sup> which roughly matches our regional pattern of IHD and diabetes mortality.

## Conclusion

Mexico stands today at an advanced stage of the epidemiological transition.<sup>20</sup> However this transition was achieved rapidly and the health system is ill-prepared for the burden of non-communicable diseases.<sup>44</sup> The cardiovascular mortality reductions that brought the developed world into advanced levels of life expectancy trends, still are in progress in Mexico. Nevertheless, no single solution is available to reduce behavioral mortality in this country since, as we show, great heterogeneity in mortality levels exist among its states.

Signs of a fragile situation in the health and mortality of the oldest age groups is observed in the decline in the low mortality benchmark used in our analysis. The aging of the population could scale up this situation if timely preventive measures are not put in place. Furthermore, a resurgence of violent deaths<sup>14 19 39</sup> has created a new burden in Mexican society.

As many developing countries, Mexico will have to face these new challenges with a broad strategy. This should include a continuous and adaptable health system ready for the current and future health adversities at the physical, mental and societal levels. Many other institutions will also have to coevolve including importantly the development of an education system that embraces and encourages physical and healthy activities in younger and future generations.

**Contributors:** JMA and TR contributed to data collection, study design, data analysis, and interpretation of the results, and wrote the first draft of the paper. VCR contributed to the study design, interpretation of the results, drafting of the paper, and finalizing the paper.

**Funding:** None

**Competing interest statement:** All authors have completed the Unified Competing Interest form and declare: no support from any organisation for the submitted work; no financial relationships with any organisations that might have an interest in the submitted work in the previous three years, no other relationships or activities that could appear to have influenced the submitted work.

**Data sharing:** All data used are publicly available in references 22 and 23. All the study is fully replicable at <https://github.com/jmaburto/DecompMex>

**Transparency:** The lead author\* affirms that this manuscript is an honest, accurate, and transparent account of the study being reported; that no important aspects of the study have been omitted; and that any discrepancies from the study as planned (and, if relevant, registered) have been explained.

**Ethical approval:** No ethical approval was needed from the institutions' boards since we work with anonymized aggregated publicly available datasets.

Aburto, Riffe, Canudas-Romo Health inequalities in Mexico

## Figures

Figure 1. State-specific life expectancy trends (grey), average (black) and low mortality benchmark (blue) for three age groups, the youngest (0-14), young adults (14-49), and older adults (50-84) by sex for the period 1990-2015. Source: calculations based on INEGI and CONAPO files.

Figure 2. Inequality in male life expectancy between states for the youngest (0-14), young adults (15-49) and older adults (50-84), 1990-2015. Source: calculations based on INEGI and CONAPO files.

Figure 3. Discordant age-rankings for average male life expectancy 2010-15 for the youngest (0-14), young adults (14-49), and older adults (50-84). Source: calculations based on INEGI and CONAPO files.

Figure 4. Cause-specific contributions to the gap between states and low mortality benchmark for older male adults (50-84), 1990-2015. Source: calculations based on INEGI and CONAPO files.

Figure 5. State-specific gap with the low mortality benchmark and its cause-of-death composition for older male adults (50-84) in 2015. Source: calculations based on INEGI and CONAPO files.

## References

1. World Health Organization. The world health report 2000: health systems: improving performance: World Health Organization 2000.
2. Mexican Society of Demography. [Demographic reconciliation of Mexico and its states 1990–2010]. Mexico City: SOMEDE-CONAPO; 2011. Conciliación demográfica de México y entidades federativas 1990–2010. Unpublished paper. Spanish2010.
3. Canudas-Romo V, García-Guerrero VM, Echarri-Cánovas CJ. The stagnation of the Mexican male life expectancy in the first decade of the 21st century: the impact of homicides and diabetes mellitus. *J Epidemiol Community Health* 2015;69(1):28-34.
4. Knaul FM, Frenk J. Health insurance in Mexico: achieving universal coverage through structural reform. *Health affairs* 2005;24(6):1467-76.
5. Neufeld LM. The Oportunidades Program and Child Growth: Mexico Perspectives. Handbook of Growth and Growth Monitoring in Health and Disease: Springer 2012:1659-71.
6. Sepúlveda J, Bustreo F, Tapia R, et al. Improvement of child survival in Mexico: the diagonal approach. *The Lancet* 2006;368(9551):2017-27.
7. Knaul FM, González-Pier E, Gómez-Dantés O, et al. The quest for universal health coverage: achieving social protection for all in Mexico. *The Lancet* 2012;380(9849):1259-79.
8. Bygbjerg I. Double burden of noncommunicable and infectious diseases in developing countries. *Science* 2012;337(6101):1499-501.
9. Urquieta-Salomón JE, Villarreal HJ. Evolution of health coverage in Mexico: evidence of progress and challenges in the Mexican health system. *Health policy and planning* 2015;31(1):28-36.
10. Nolte E, McKee CM. Measuring the health of nations: updating an earlier analysis. *Health affairs* 2008;27(1):58-71.
11. Nolte E, McKee M. Measuring the health of nations: analysis of mortality amenable to health care. *Bmj* 2003;327(7424):1129.



Aburto, Riffe, Canudas-Romo Health inequalities in Mexico

12. Franco-Marina F, Lozano R, Villa B, et al. La mortalidad en México, 2000-2004. Muertes Evitables: magnitud, distribución y tendencias. *Dirección General de Información en Salud, Secretaría de Salud México* 2006:2.
13. Dávila-Cervantes CA, Agudelo-Botero M. Mortalidad evitable en México y su contribución a los años de vida perdidos: Análisis por grado de marginación estatal, 2001-2010. *Papeles de población* 2014;20(82):267-86.
14. Aburto JM, Beltrán-Sánchez H, García-Guerrero VM, et al. Homicides in Mexico reversed life expectancy gains for men and slowed them for women, 2000–10. *Health Affairs* 2016;35(1):88-95.
15. Whelpton PK, Eldridge HT, Seigel JS. Forecasts of the Population of the United States, 1945-1975: US Govt. Print. Off. 1948.
16. Wunsch G. A minimum life-table for Europe. *European Demographic Information Bulletin* 1975;5(1):2-10.
17. Vallin J, Meslé F. Minimum Mortality: A Predictor of Future Progress? *Population-E* 2008;63(04):557-90.
18. González-Pier E, Barraza-Lloréns M, Beyeler N, et al. Mexico's path towards the Sustainable Development Goal for health: an assessment of the feasibility of reducing premature mortality by 40% by 2030. *The Lancet Global Health* 2016;4(10):e714-e25.
19. Gamlin J. Violence and homicide in Mexico: a global health issue. *The Lancet* 2015;385(9968):605-06.
20. Gómez-Dantés H, Fullman N, Lamadrid-Figueroa H, et al. Dissonant health transition in the states of Mexico, 1990–2013: a systematic analysis for the Global Burden of Disease Study 2013. *The Lancet* 2016;388(10058):2386-402.
21. Frenk J. Bridging the divide: global lessons from evidence-based health policy in Mexico. *The Lancet* 2006;368(9539):954-61.
22. INEGI. Estadísticas vitales Mortalidad. *National Institute of Statistics Mexico* 2017
23. CONAPO. Mexican Population Council: Population estimates. 2017 [Available from: <https://datos.gob.mx/busca/dataset/activity/proyecciones-de-la-poblacion-de-mexico> accessed 21/4/2017 2017.
24. Patel KV, Peek MK, Wong R, et al. Comorbidity and disability in elderly Mexican and Mexican American adults: findings from Mexico and the southwestern United States. *Journal of aging and health* 2006;18(2):315-29.
25. Arriaga EE. Measuring and explaining the change in life expectancies. *Demography* 1984;21(1):83-96.
26. Canudas-Romo V, Liu L, Zimmerman L, et al. Potential gains in reproductive-aged life expectancy by eliminating maternal mortality: a demographic bonus of achieving MDG 5. *PloS one* 2014;9(2):e86694.
27. Cao B, Bray F, Beltrán-Sánchez H, et al. Benchmarking life expectancy and cancer mortality: global comparison with cardiovascular disease 1981-2010. *Bmj* 2017;357:j2765.
28. González-González C, Sánchez-García S, Juárez-Cedillo T, et al. Health care utilization in the elderly Mexican population: expenditures and determinants. *BMC public health* 2011;11(1):192.
29. Camarda CG. MortalitySmooth: An R Package for Smoothing Poisson Counts with P-Splines. *Journal of Statistical Software* 2012;50:1-24.
30. Wilmoth JR, Andreev K, Jdanov D, et al. Methods protocol for the human mortality database. *University of California, Berkeley, and Max Planck Institute for Demographic Research, Rostock* URL: <http://mortality.org> [version 31/05/2007] 2007;9:10-11.
31. Horiuchi S, Wilmoth JR, Pletcher SD. A decomposition method based on a model of continuous change. *Demography* 2008;45(4):785-801.

Aburto, Riffe, Canudas-Romo Health inequalities in Mexico

32. Hernández B, Ramírez-Villalobos D, Romero M, et al. Assessing quality of medical death certification: concordance between gold standard diagnosis and underlying cause of death in selected Mexican hospitals. *Population health metrics* 2011;9(1):38.
33. Steinberg N. Neither Rights Nor Security: Killings, Torture, and Disappearances in Mexico's War on Drugs: Human Rights Watch 2011.
34. Wright MW. Epistemological Ignorances and Fighting for the Disappeared: Lessons from Mexico. *Antipode* 2017;49(1):249-69.
35. Gavin JR, Alberti KG, Davidson MB, et al. Report of the expert committee on the diagnosis and classification of diabetes mellitus. *Diabetes care* 2003;26(SUPPL. 1)
36. Beltrán-Sánchez H. Avoidable mortality. *International handbook of adult mortality*: Springer 2011:491-508.
37. Nolte E, McKee CM. In amenable mortality—deaths avoidable through health care—progress in the US lags that of three European countries. *Health Affairs* 2012;10.1377/hlthaff. 2011.0851.
38. Holland W. Commentary: should we not go further than descriptions of avoidable mortality? *International journal of epidemiology* 2003;32(3):447-48.
39. Canudas-Romo V, Aburto JM, García-Guerrero VM, et al. Mexico's epidemic of violence and its public health significance on average length of life. *Journal of epidemiology and community health* 2017;71(2):188-93.
40. Espinal-Enríquez J, Larralde H. Analysis of México's Narco-War Network (2007–2011). *PloS one* 2015;10(5):e0126503.
41. Hossain P, Kavar B, El Nahas M. Obesity and diabetes in the developing world—a growing challenge. *New England journal of medicine* 2007;356(3):213-15.
42. Aschner P. Obesity in Latin America. *Metabolic Syndrome: A Comprehensive Textbook* 2016:33-39.
43. Kuri-Morales P, Emberson J, Alegre-Díaz J, et al. The prevalence of chronic diseases and major disease risk factors at different ages among 150 000 men and women living in Mexico City: cross-sectional analyses of a prospective study. *BMC Public Health* 2009;9(1):9.
44. Rivera JA, Barquera S, Campirano F, et al. Epidemiological and nutritional transition in Mexico: rapid increase of non-communicable chronic diseases and obesity. *Public health nutrition* 2002;5(1a):113-22.

## Endnotes

<sup>i</sup> The percentage of the population aged 65 or older is projected to go from 6.0% in 2015 to 10.2% in 2030 (Reference: CONAPO)

<sup>ii</sup> [<https://www.businessinsider.com.au/homicides-hit-new-high-mexico-alongside-increase-in-robberies-2017-11?r=US&IR=T>]

<sup>iii</sup> [<http://www.economist.com/blogs/graphicdetail/2017/03/daily-chart-23>]

## Additional Files

Additional file 1 | Supplemental material

1  
2  
3  
4  
5  
6  
7  
8  
9  
10  
11  
12  
13  
14  
15  
16  
17  
18  
19  
20  
21  
22  
23  
24  
25  
26  
27  
28  
29  
30  
31  
32  
33  
34  
35  
36  
37  
38  
39  
40  
41  
42  
43  
44  
45  
46  
47  
48  
49  
50  
51  
52  
53  
54  
55  
56  
57  
58  
59  
60

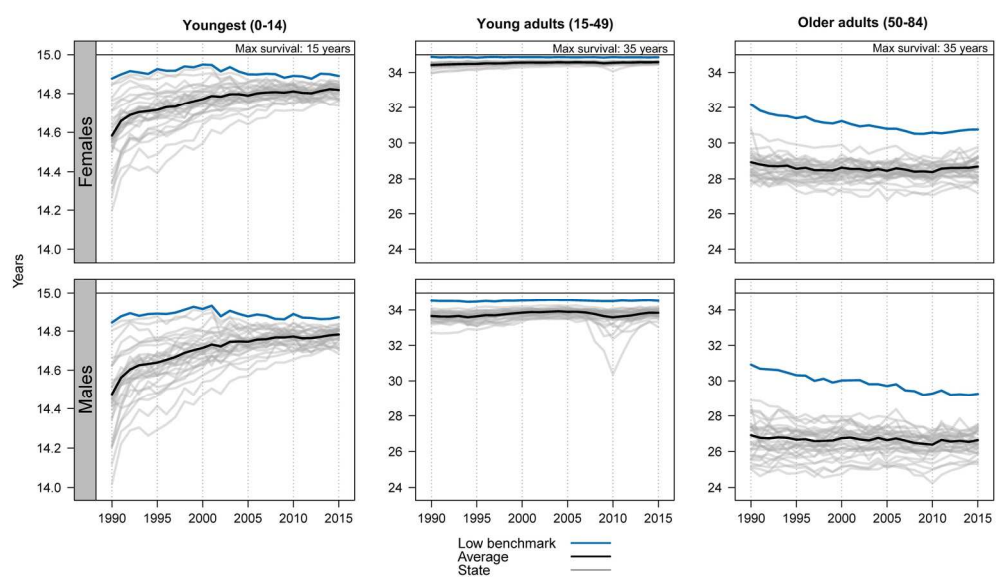

Figure 1. State-specific life expectancy trends (grey), average (black) and low mortality bench-mark (blue) for three age groups, the youngest (0-14), young adults (14-49), and older adults (50-84) by sex for the period 1990-2015. Source: calculations based on INEGI and CONAPO files.

177x103mm (300 x 300 DPI)

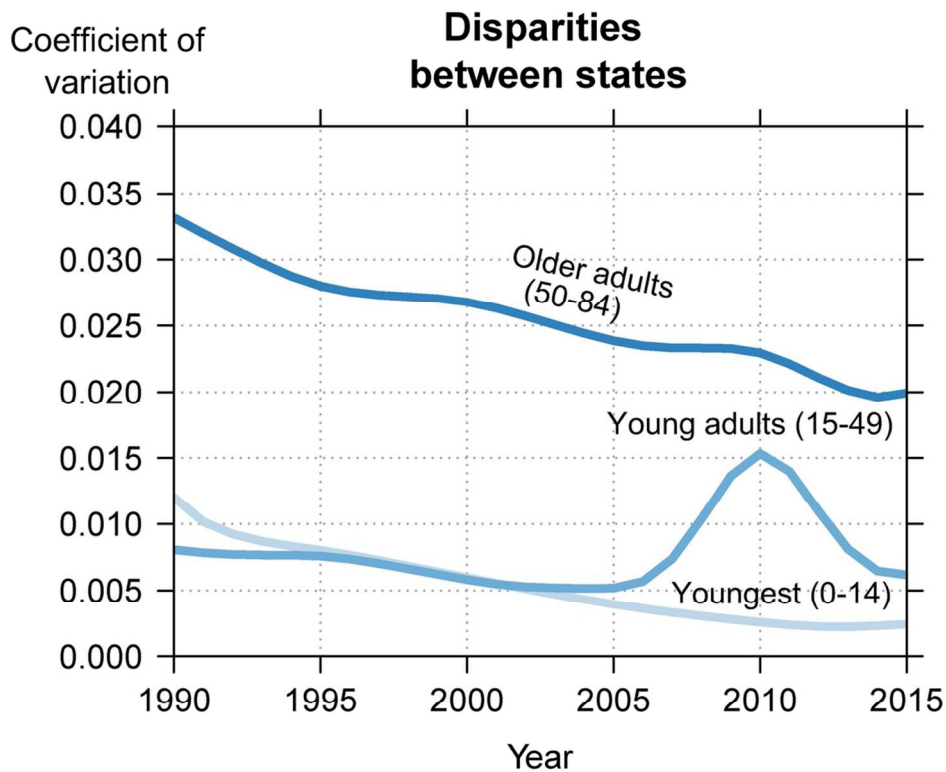

Figure 2. Inequality in male life expectancy between states for the youngest (0-14), young adults (15-49) and older adults (50-84), 1990-2015. Source: calculations based on INEGI and CONAPO files.

101x81mm (300 x 300 DPI)

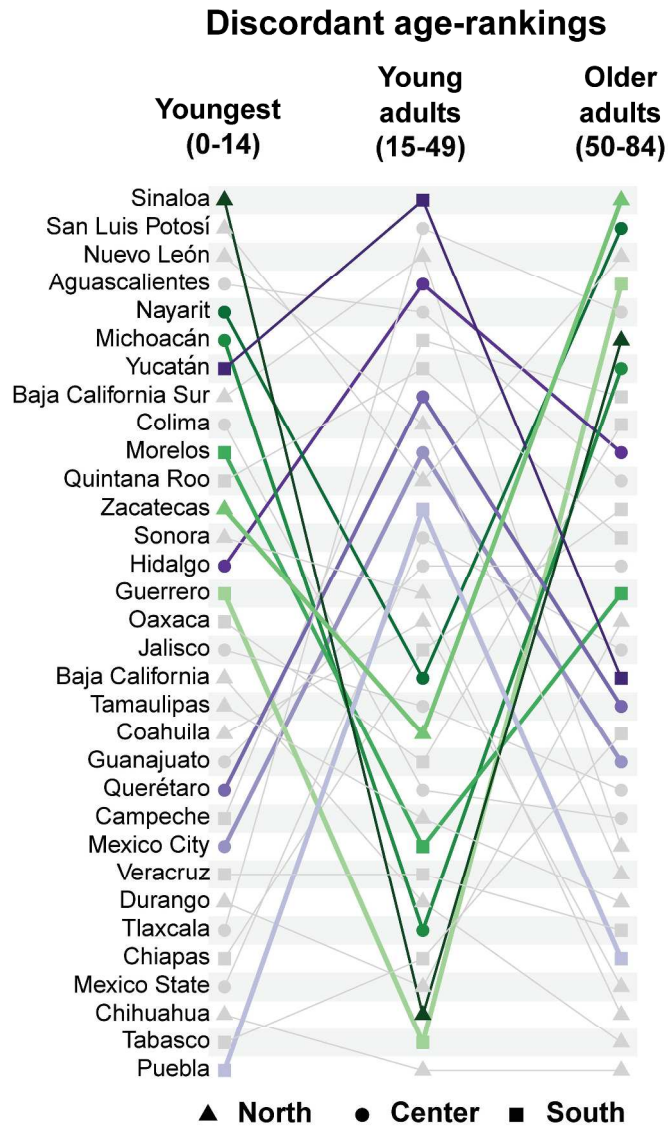

Figure 3. Discordant age-rankings for average male life expectancy 2010-15 for the youngest (0-14), young adults (14-49), and older adults (50-84). Source: calculations based on INEGI and CONAPO files.

270x472mm (300 x 300 DPI)

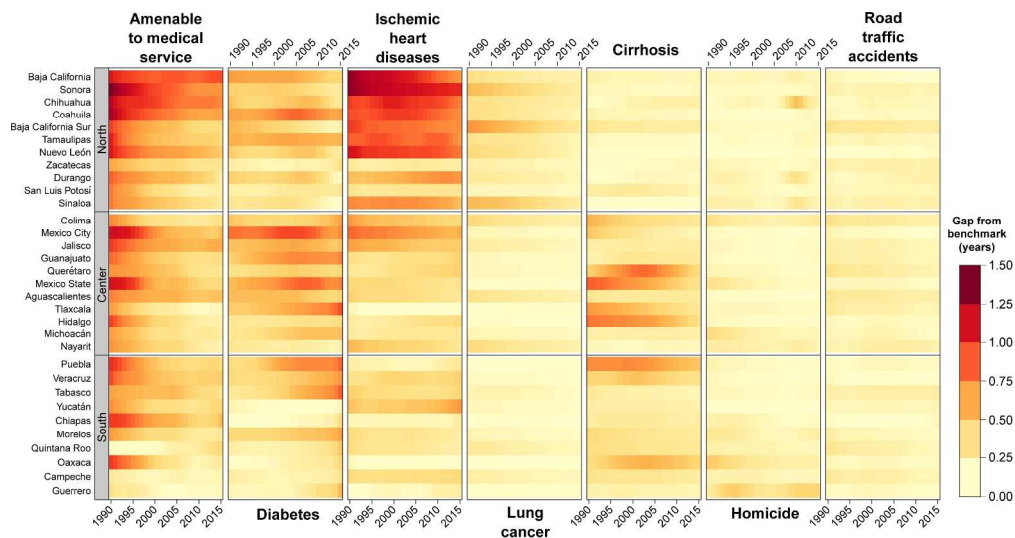

Figure 4. Cause-specific contributions to the gap between states and low mortality benchmark for older male adults (50-84), 1990-2015. Source: calculations based on INEGI and CONAPO files.

268x140mm (300 x 300 DPI)

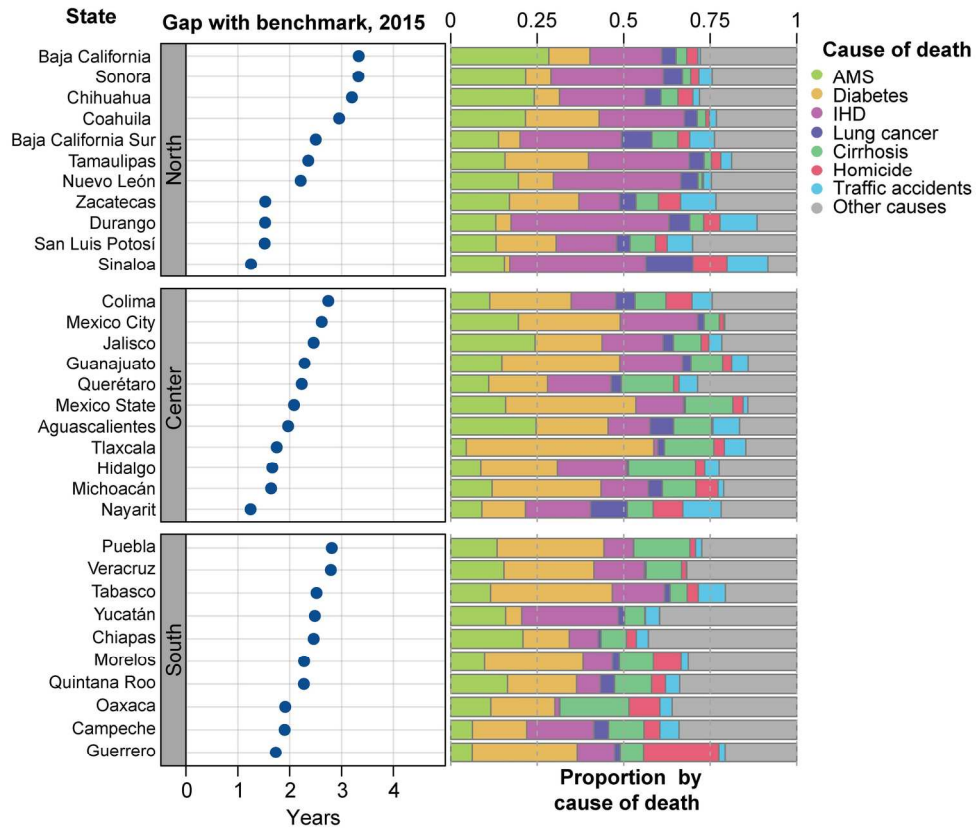

Figure 5. State-specific gap with the low mortality benchmark and its cause-of-death composition for older male adults (50-84) in 2015. Source: calculations based on INEGI and CONAPO files.

177x155mm (300 x 300 DPI)

1  
2  
3  
4  
5  
6 Inequalities in life expectancies among Mexican states, 1990-2015:  
7 deterioration in adult survival  
8  
9

10 José Manuel Aburto<sup>1</sup>, Tim Riffe<sup>2</sup>, and Vladimir Canudas-Romo<sup>3</sup>

11 <sup>1</sup>Institute of Public Health, University of Southern Denmark

12 <sup>2</sup>Max Planck Institute for Demographic Research

13 <sup>3</sup>School of Demography, Australian National University  
14  
15  
16  
17  
18  
19  
20  
21  
22  
23  
24  
25  
26  
27  
28  
29  
30  
31  
32  
33  
34  
35  
36  
37  
38  
39  
40  
41  
42  
43  
44  
45  
46  
47  
48  
49  
50  
51  
52  
53  
54  
55  
56  
57  
58  
59  
60

January 5, 2018



## Supplemental material

Appendix Table 1. Definitions of cause-of-death categories using the 9th and 10th revision of the International Classification of Diseases.

| Category                                                                                                                                                                                                                                                                                                                                                           | ICD-10                                                                                                                                                                      | ICD-9                                                                                                                             |
|--------------------------------------------------------------------------------------------------------------------------------------------------------------------------------------------------------------------------------------------------------------------------------------------------------------------------------------------------------------------|-----------------------------------------------------------------------------------------------------------------------------------------------------------------------------|-----------------------------------------------------------------------------------------------------------------------------------|
| <b>I. Amenable to medical service</b>                                                                                                                                                                                                                                                                                                                              |                                                                                                                                                                             |                                                                                                                                   |
| I.A. AM-Infectious & respiratory diseases : intestinal infections, tuberculosis, zoonotic bacterial diseases, other bacterial diseases, septicemia, poliomyelitis, measles, rubella, infectious hepatitis, ornithosis, rickettsioses/ arthropod-borne, syphilis (all forms), yaws, respiratory diseases, influenza & pneumonia, chronic lower respiratory diseases | A00-A09, A16-A19, B90, A20-A26, A28, A32, A33, A35, A36, A37, A40-A41, A80, B05-B06, B15-B19, A70, A68, A75, A77, A50-A64, A66, J00-J08, J20-J39, J60-J99, J09-J18, J40-J47 | 001-009, 010-018, 32, 33, 37, 137, 020-027, 38, 45, 55-56, 70, 73, 080-082, 087, 090-099, 102, 460-479, 500-519, 480-488, 490-496 |
| I.B. AM-Cancers: malignant neoplasm of colon, skin, breast, cervix, prostate, testis, bladder, kidney-Wilm's tumor only, eye, thyroid carcinoma, Hodgkins disease, leukemia                                                                                                                                                                                        | C16,C18-C21, C43-C44, C50, C53, C61, C62, C67, C64, C69, C73, C81, C91-C95                                                                                                  | 153-154, 172-173, 174, 180, 185, 186, 188-189, 190, 193, 201, 204-208                                                             |
| I.C. AM-Circulatory: active/acute rheumatic fever, chronic rheumatic heart disease, hypertensive disease, cerebrovascular disease                                                                                                                                                                                                                                  | I00-I02, I05-I09, I10-I13, I15, I60-I69                                                                                                                                     | 390-392, 393-398, 401-405, 430-438                                                                                                |
| I.D. AM-Birth: maternal deaths (all), congenital cardiovascular anomalies, perinatal deaths (excluding stillbirths)                                                                                                                                                                                                                                                | O00-O99, Q20-Q28, P00-P96                                                                                                                                                   | 630-676, 745-747, 760-779                                                                                                         |
| I.E. AM-Other: disease of thyroid, epilepsy, peptic ulcer, appendicitis, abdominal hernia, cholelithiasis & cholecystitis, nephritis, benign prostatic hyperplasia, misadventures to patients during surgical or medical care, cisticercosis                                                                                                                       | E00-E07, 40-G41, K25-K27, K35-K38, K40-K46, K80-K81, N00-N07, N17-N19, N25-N27, N40, Y60-Y69, Y83-Y84, B69                                                                  | 240-246, 345, 531-533, 540-543, 550-553, 574-575.1, 580-589, 600, E870-E876, E878-E879                                            |
| <b>II. Diabetes</b>                                                                                                                                                                                                                                                                                                                                                | E10-E14                                                                                                                                                                     | 250                                                                                                                               |
| <b>III. Ischemic Heart Diseases (IHD)</b>                                                                                                                                                                                                                                                                                                                          | I20-I25                                                                                                                                                                     | 410-414, 429.2                                                                                                                    |
| <b>IV. Lung cancer</b>                                                                                                                                                                                                                                                                                                                                             | C33-C34                                                                                                                                                                     | 162                                                                                                                               |
| <b>V. Cirrhosis</b>                                                                                                                                                                                                                                                                                                                                                | K70                                                                                                                                                                         | 571.1-571.3                                                                                                                       |
| <b>VI. Homicides</b>                                                                                                                                                                                                                                                                                                                                               | X85-Y09                                                                                                                                                                     | E960-E969                                                                                                                         |
| <b>VII. Road traffic accidents</b>                                                                                                                                                                                                                                                                                                                                 | V01-V99                                                                                                                                                                     | E810-E819                                                                                                                         |
| <b>VIII. Residual Causes</b> : HIV/AIDS; suicide and self-inflicted injuries; other cancers and other heart diseases                                                                                                                                                                                                                                               | B20-B24, U03; X60-X84, Y87.0; C00-D48; I00-I99 if not listed above; R00-R99                                                                                                 | 042-044; E950-E959; 140-239; 390-459 if not listed above; 780-799                                                                 |

Figure 1: Cause-specific death counts (different  $y$ -scale for each cause), 1990-2010.

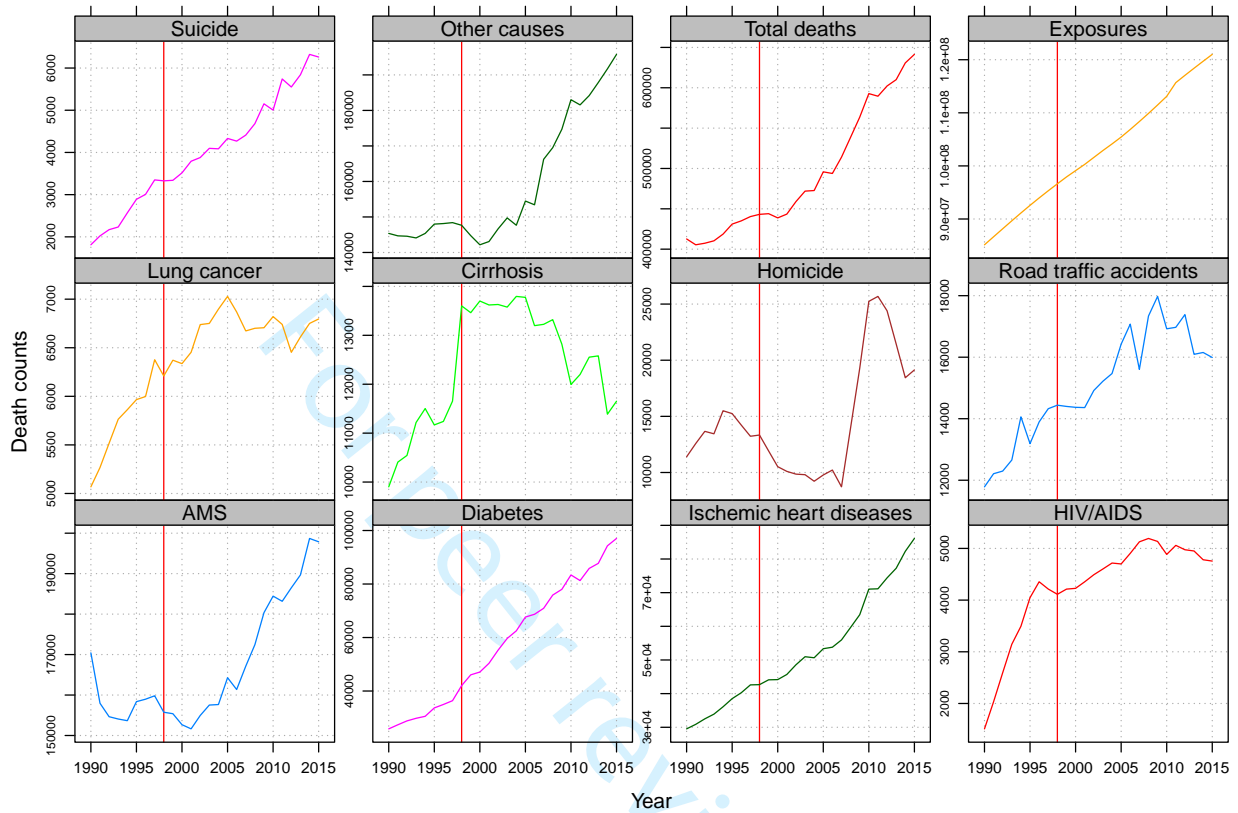

Note: AMS “amenable to medical service”. The red line indicates the change from ICD 9 to ICD 10.

### Temporary Life Expectancy

Temporary life expectancy between ages  $x_1$  and  $x_2$ , for  $x_1 < x_2$ , is defined as the average years of life lived between these ages according to a given set of mortality rates (Arriaga 1984). We denote this quantity as  $(x_2 - x_1)e_{x_1}$ , and its benchmark based on minimum death rates for every age and cause of death among the Mexican states for each year as  $(x_2 - x_1)e_{x_1}^*$ . Defined in terms of the lifetable survival function,  $\ell(x)$ :

$$(x_2 - x_1)e_{x_1} = \frac{\int_{x_1}^{x_2} \ell(x) dx}{\ell(x_1)} \tag{1}$$

If full survival is achieved, the life expectancy is  $x_2 - x_1$ . For example, if we set  $x_1 = 0$  and  $x_2 = 15$ , and no person dies between the ages 0 and 15, on average the population lives 15 full years.

### References

Arriaga, E. E. (1984). Measuring and explaining the change in life expectancies. *Demography*, 21(1):83–96.

Figure 2: Inequality in life expectancy between states for youngest (0-14), young adults (15-49), and older adults (50-84) by sex, 1990-2015.

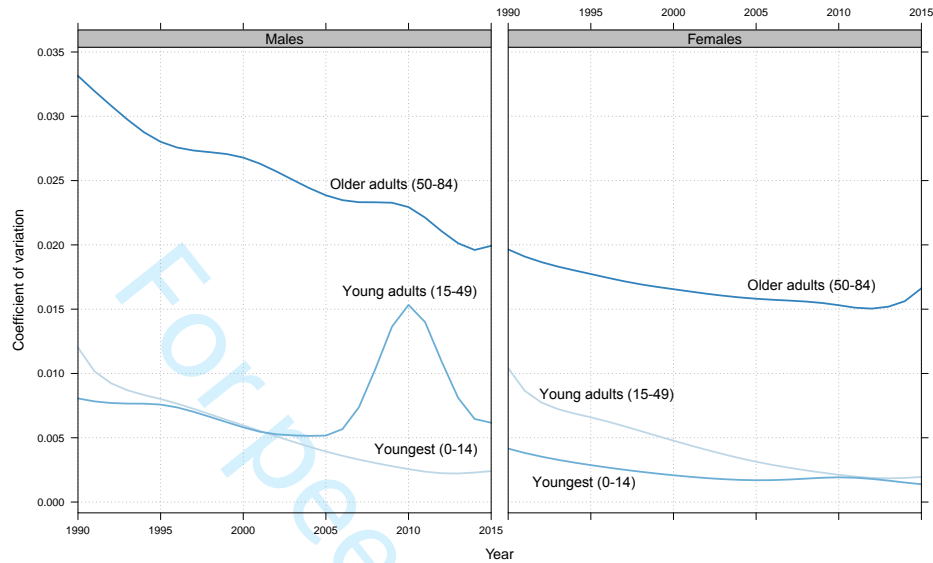

Figure 3: State ranking for average female life expectancy 2010-15 for the youngest (0-14), young adults (15-49), and older adults (50-84).

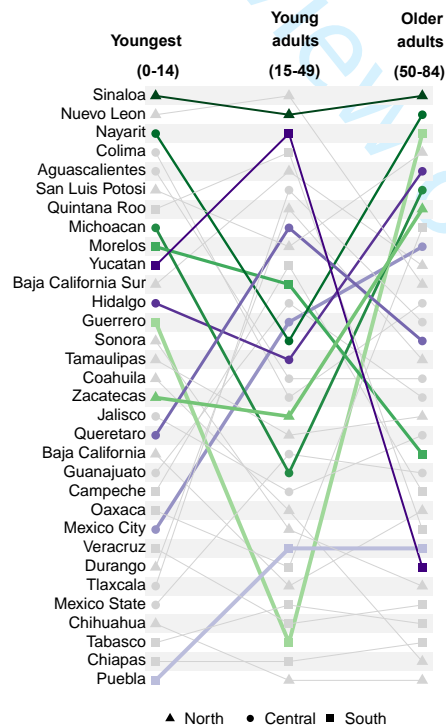

Source: calculations based on INEGI and CONAPO files.

Figure 4: Cause-specific contributions to state differences from low mortality benchmark for older male adults (ages 50-84), 1990-2015. States grouped into three regions. Reproduced from manuscript Figure 4 to have color scale comparable with other Supplementary figures. In subsequent figures 5-9 the color was rescaled to make them comparable over age groups in the supplemental material, the maximum value observed was 2.6 years caused by homicides in Chihuahua in 2010.

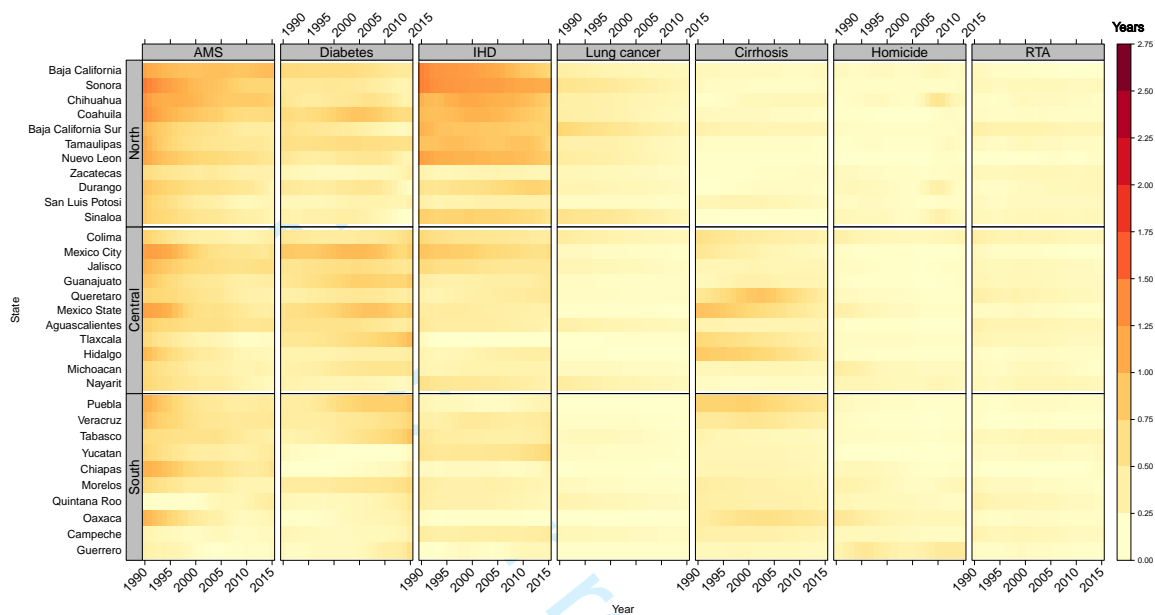

Note:  
AMS is “amenable to medical service”, IHD is “ischemic heart diseases”, and RTA is “road traffic accidents”. Source: own calculations.

Figure 5: Cause-specific contributions to state differences from low mortality benchmark for older female adults (ages 50-84), 1990-2015.

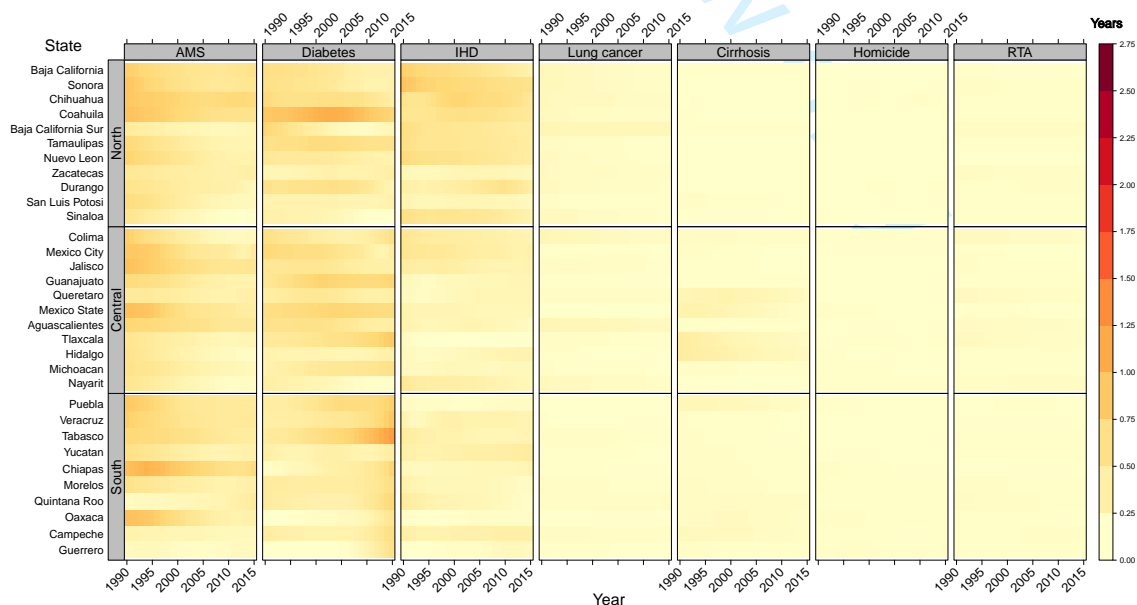

Note:  
AMS is “amenable to medical service”, IHD is “ischemic heart diseases”, and RTA is “road traffic accidents”. Source: own calculations.

Figure 6: Cause-specific contributions to state differences from low mortality benchmark for male youngest population (ages 0-14), 1990-2015.

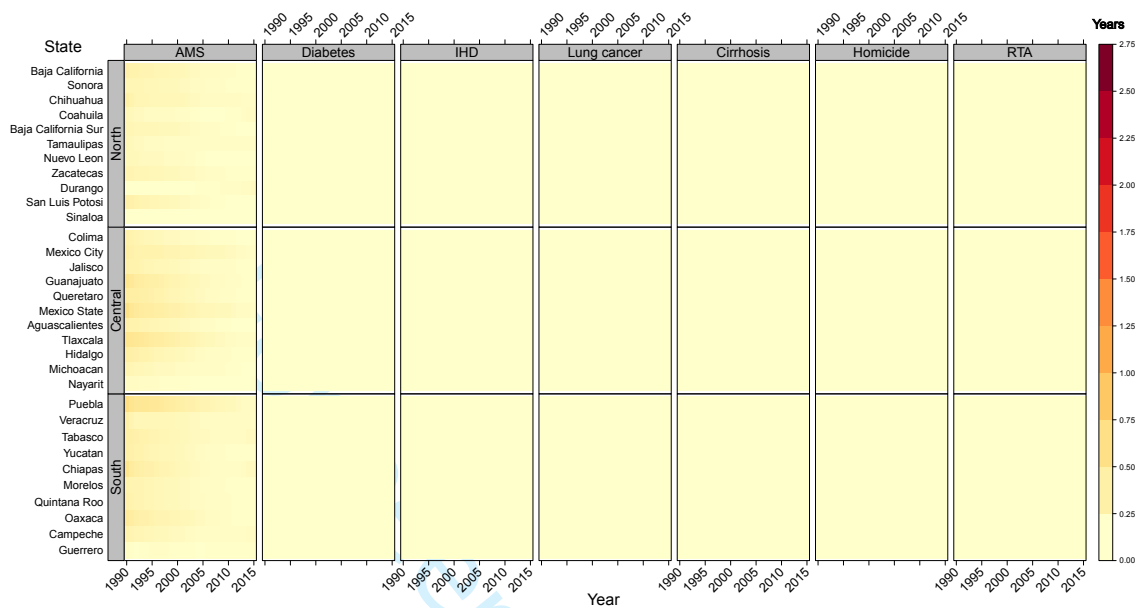

Note: AMS is “amenable to medical service”, IHD is “isquemic heart diseases”, and RTA is “road traffic accidents”. Source: own calculations.

Figure 7: Cause-specific contributions to state differences from low mortality benchmark for female youngest population (ages 0-14), 1990-2015.

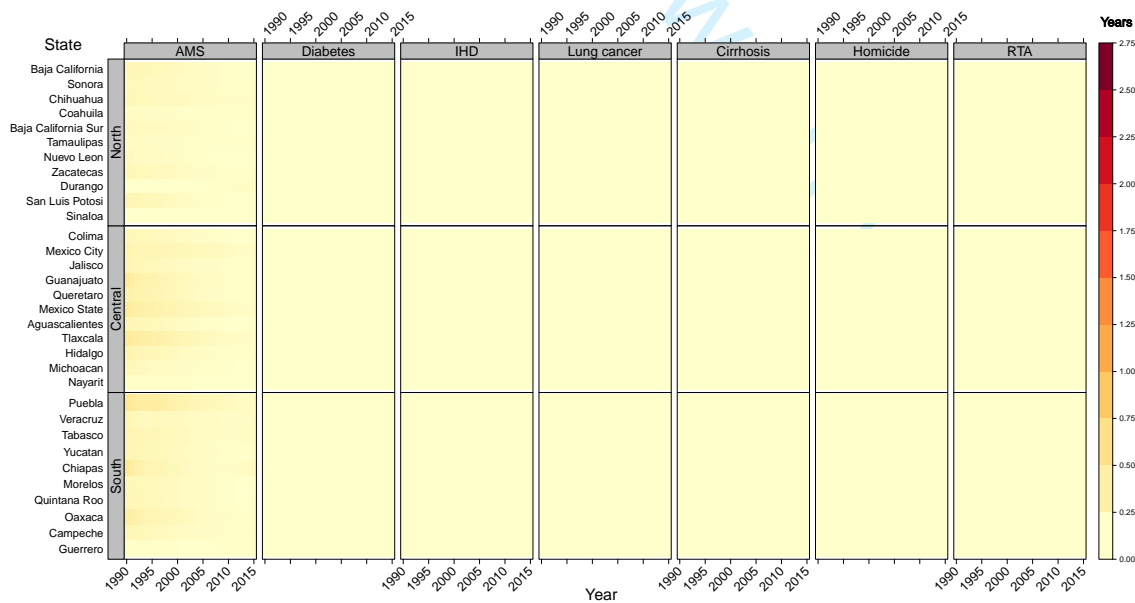

Note: AMS is “amenable to medical service”, IHD is “isquemic heart diseases”, and RTA is “road traffic accidents”. Source: own calculations.

Figure 8: Cause-specific contributions to state differences from low mortality benchmark for male young adults (ages 15-49), 1990-2015.

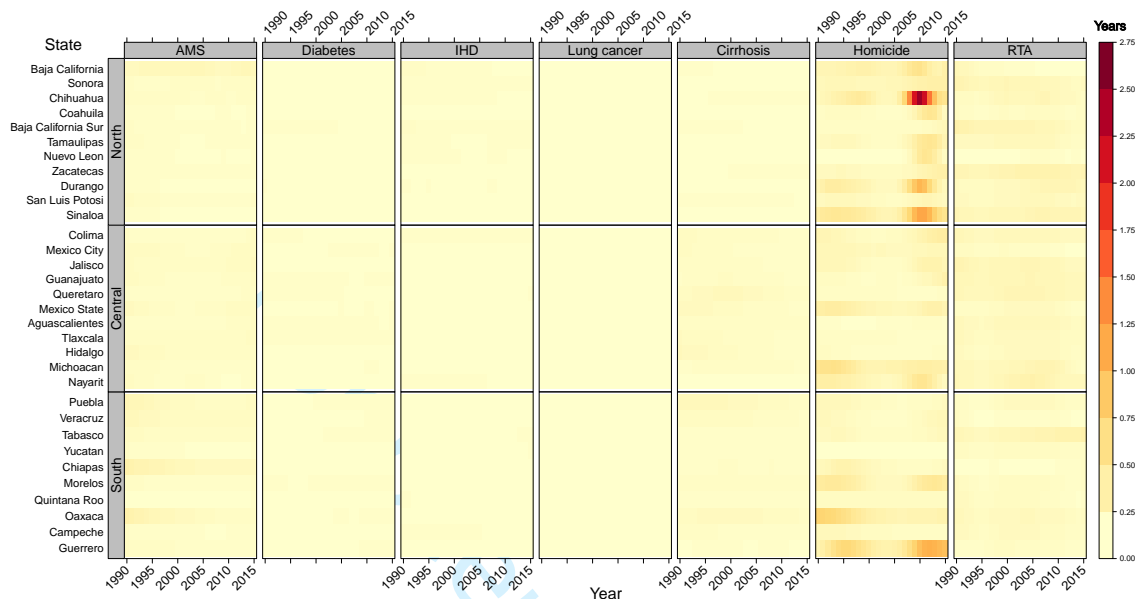

Note:

AMS is “amenable to medical service”, IHD is “ischemic heart diseases”, and RTA is “road traffic accidents”. Source: own calculations.

Figure 9: Cause-specific contributions to state differences from low mortality benchmark for female young adults (ages 15-49), 1990-2015.

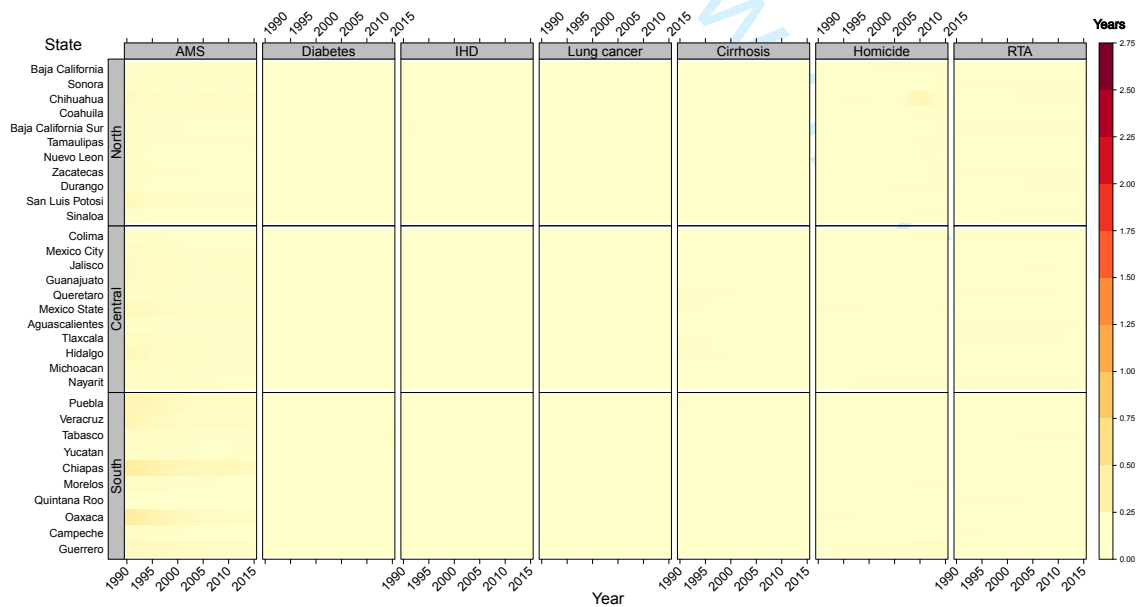

Note:

AMS is “amenable to medical service”, IHD is “ischemic heart diseases”, and RTA is “road traffic accidents”. Source: own calculations.

Figure 10: State specific gap with low mortality benchmark for selected years between ages 0-14. Source: own calculations.

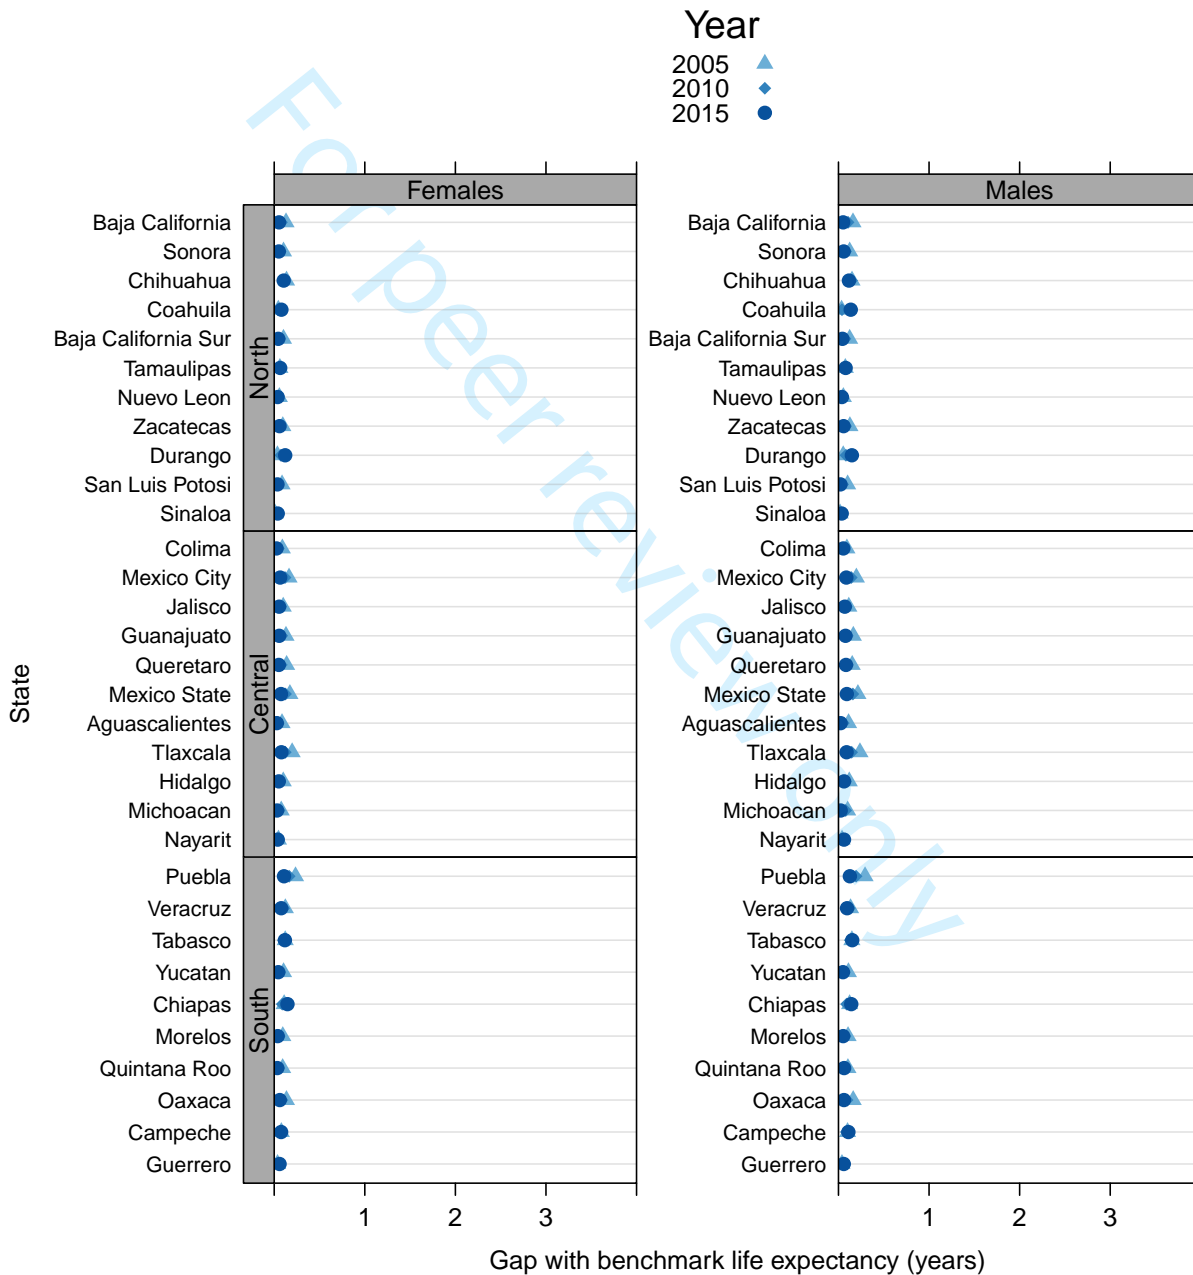

Figure 11: State specific gap with low mortality benchmark for selected years between ages 15-49. Source: own calculations.

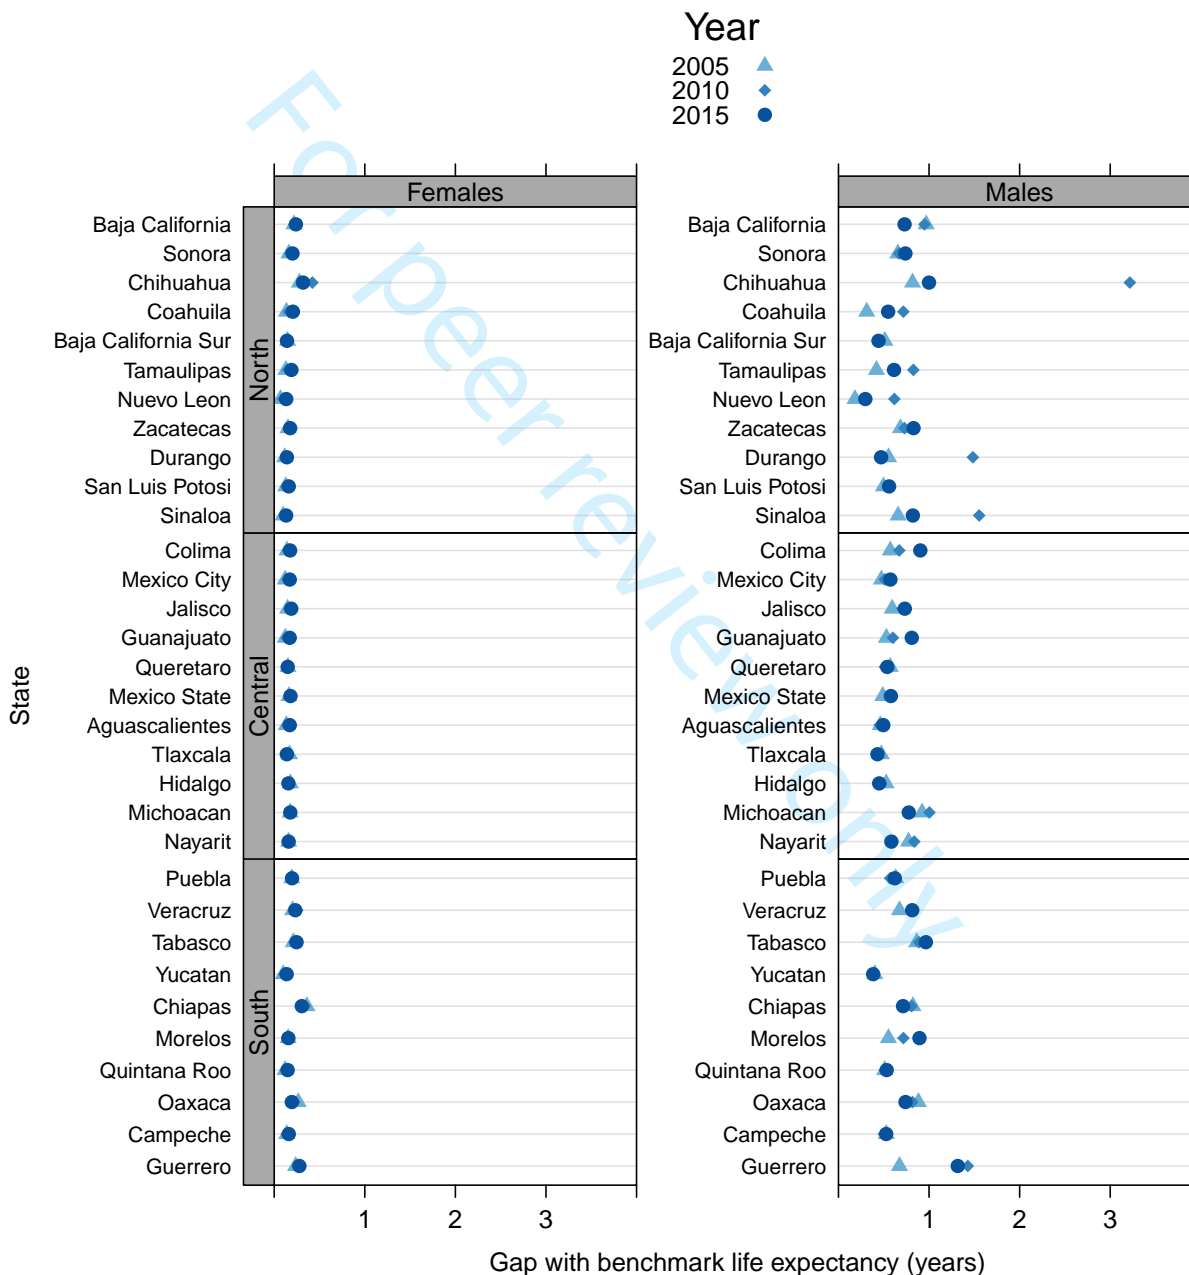



Figure 12: State specific gap with low mortality benchmark for selected years between ages 50-84. Source: own calculations.

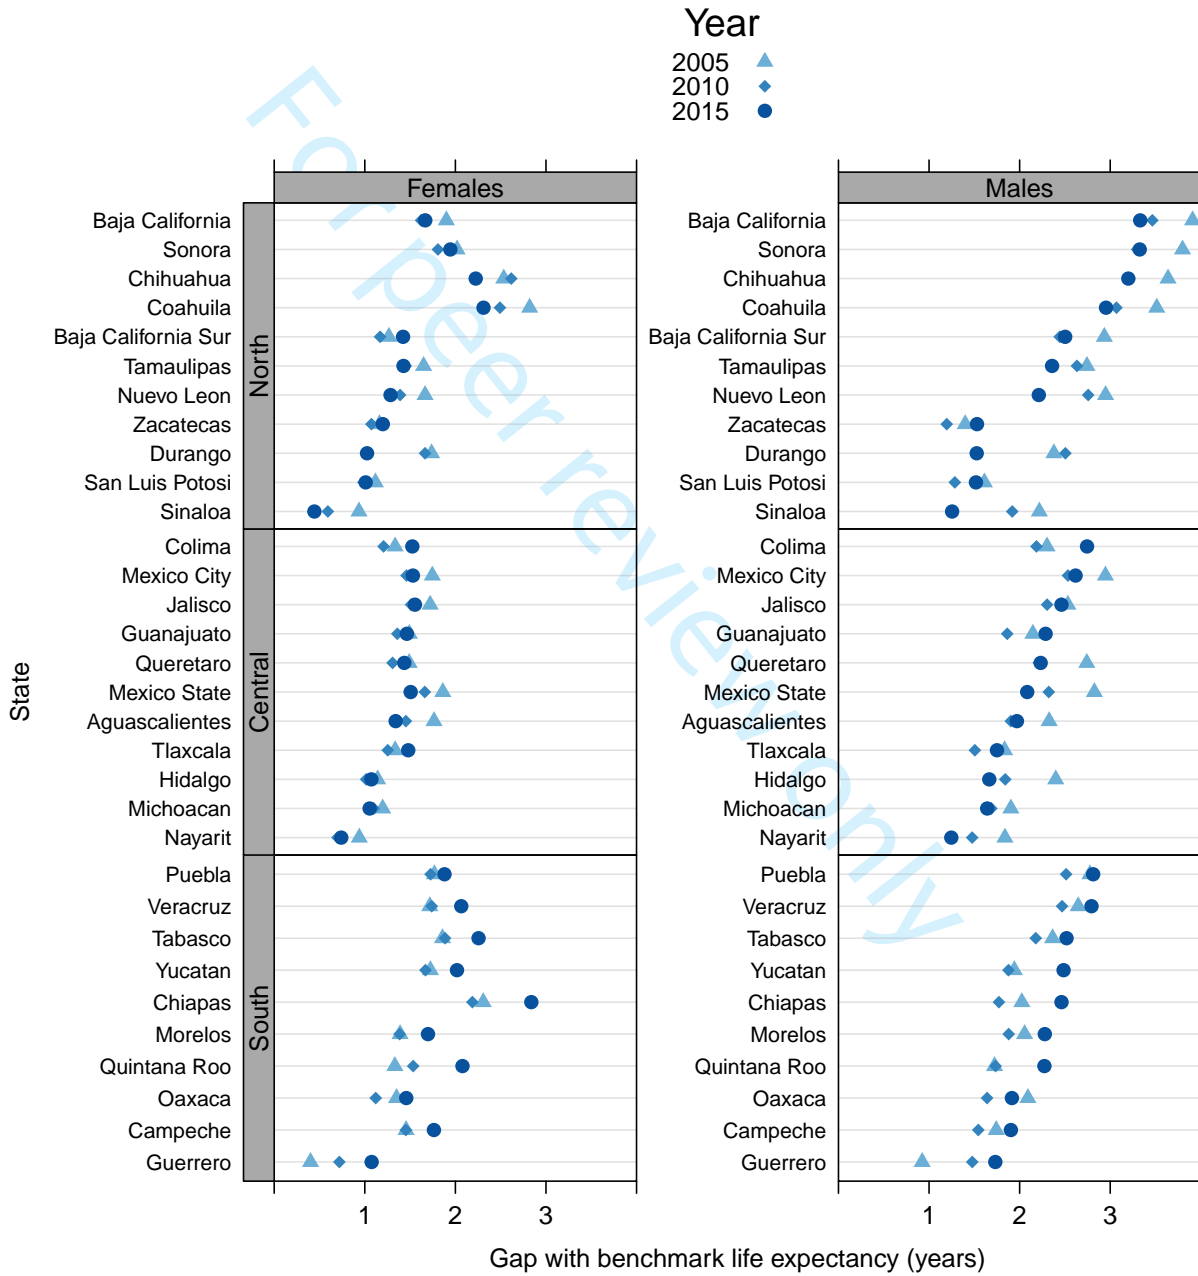

Figure 13: Proportion by cause of death from benchmark mortality for youngest females (ages 0-14). Source: own calculations.

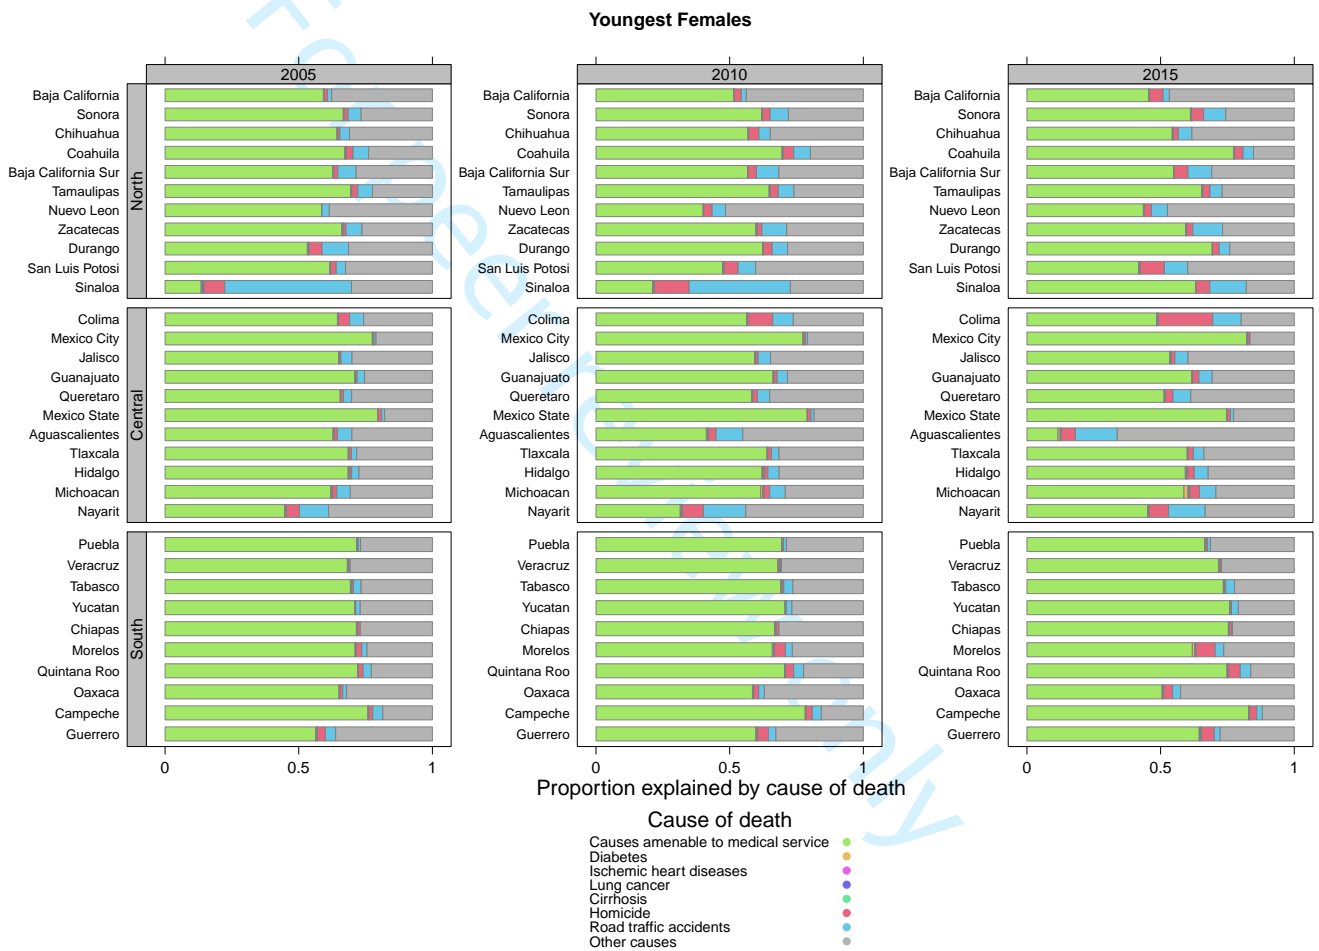

1  
2  
3  
4  
5  
6  
7  
8  
9  
10  
11  
12  
13  
14  
15  
16  
17  
18  
19  
20  
21  
22  
23  
24  
25  
26  
27  
28  
29  
30  
31  
32  
33  
34  
35  
36  
37  
38  
39  
40  
41  
42  
43  
44  
45  
46  
47  
48  
49  
50  
51  
52  
53  
54  
55  
56  
57  
58  
59  
60

Figure 14: Proportion by cause of death from benchmark mortality for youngest males (ages 0-14). Source: own calculations.

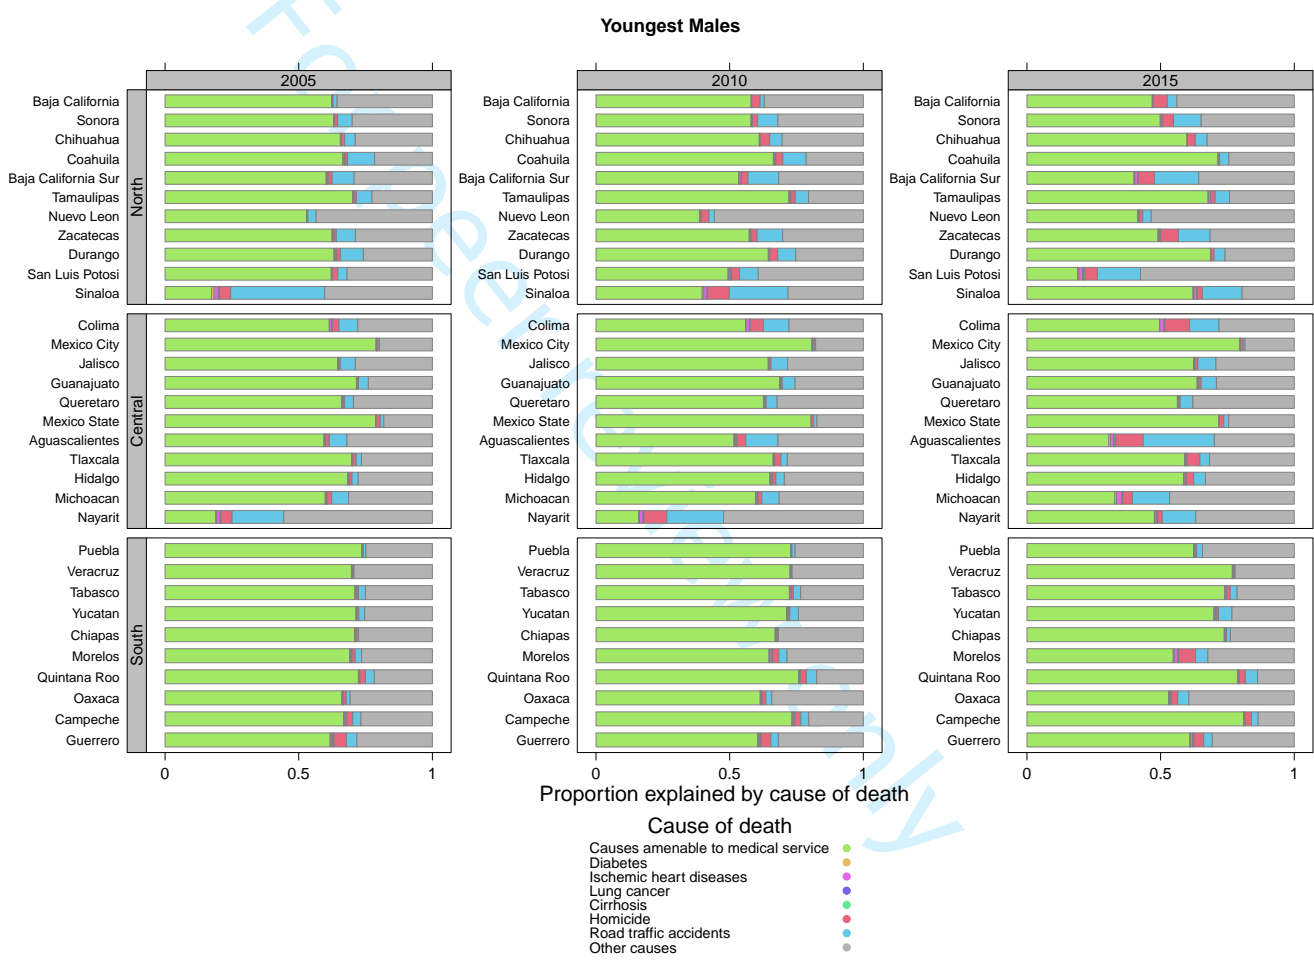

Figure 15: Proportion by cause of death from benchmark mortality for young adult females (ages 15-49).  
Source: own calculations.

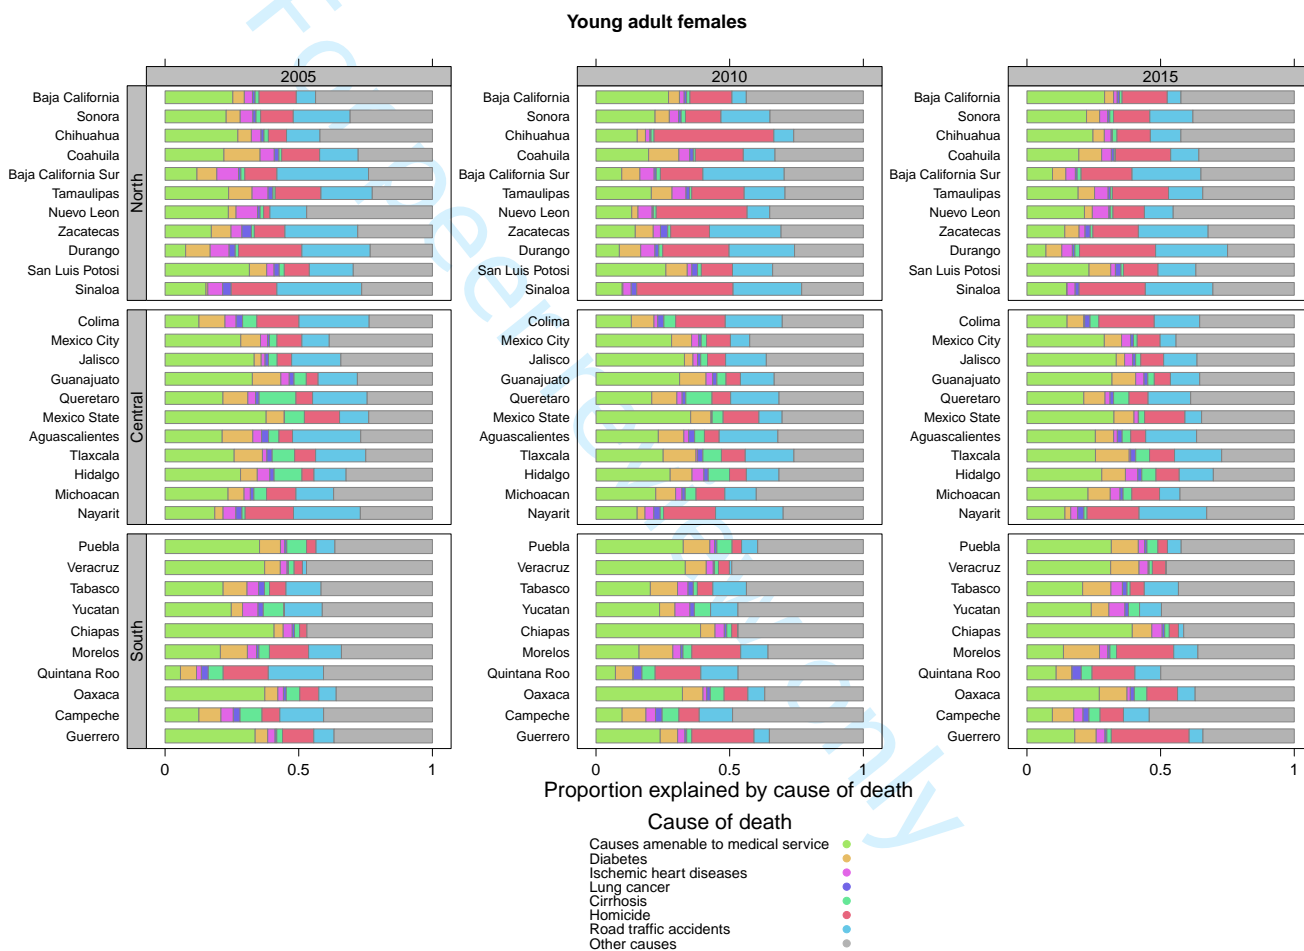

1  
2  
3  
4  
5  
6  
7  
8  
9  
10  
11  
12  
13  
14  
15  
16  
17  
18  
19  
20  
21  
22  
23  
24  
25  
26  
27  
28  
29  
30  
31  
32  
33  
34  
35  
36  
37  
38  
39  
40  
41  
42  
43  
44  
45  
46  
47  
48  
49  
50  
51  
52  
53  
54  
55  
56  
57  
58  
59  
60

Figure 16: Proportion by cause of death from benchmark mortality for young adult males (ages 15-49).  
Source: own calculations.

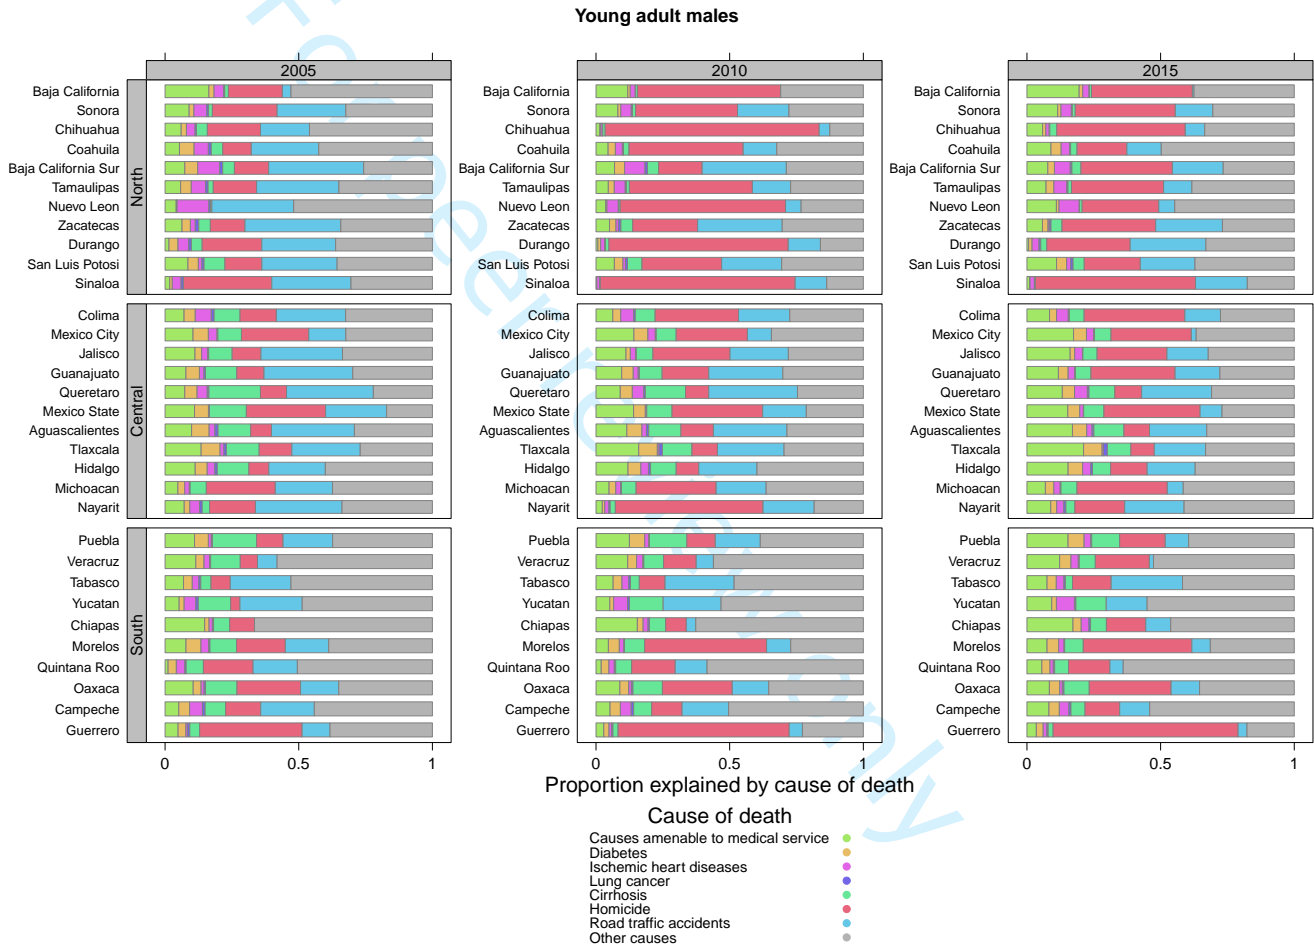

Figure 17: Proportion by cause of death from benchmark mortality for older male adults (ages 50-84). Source: own calculations.

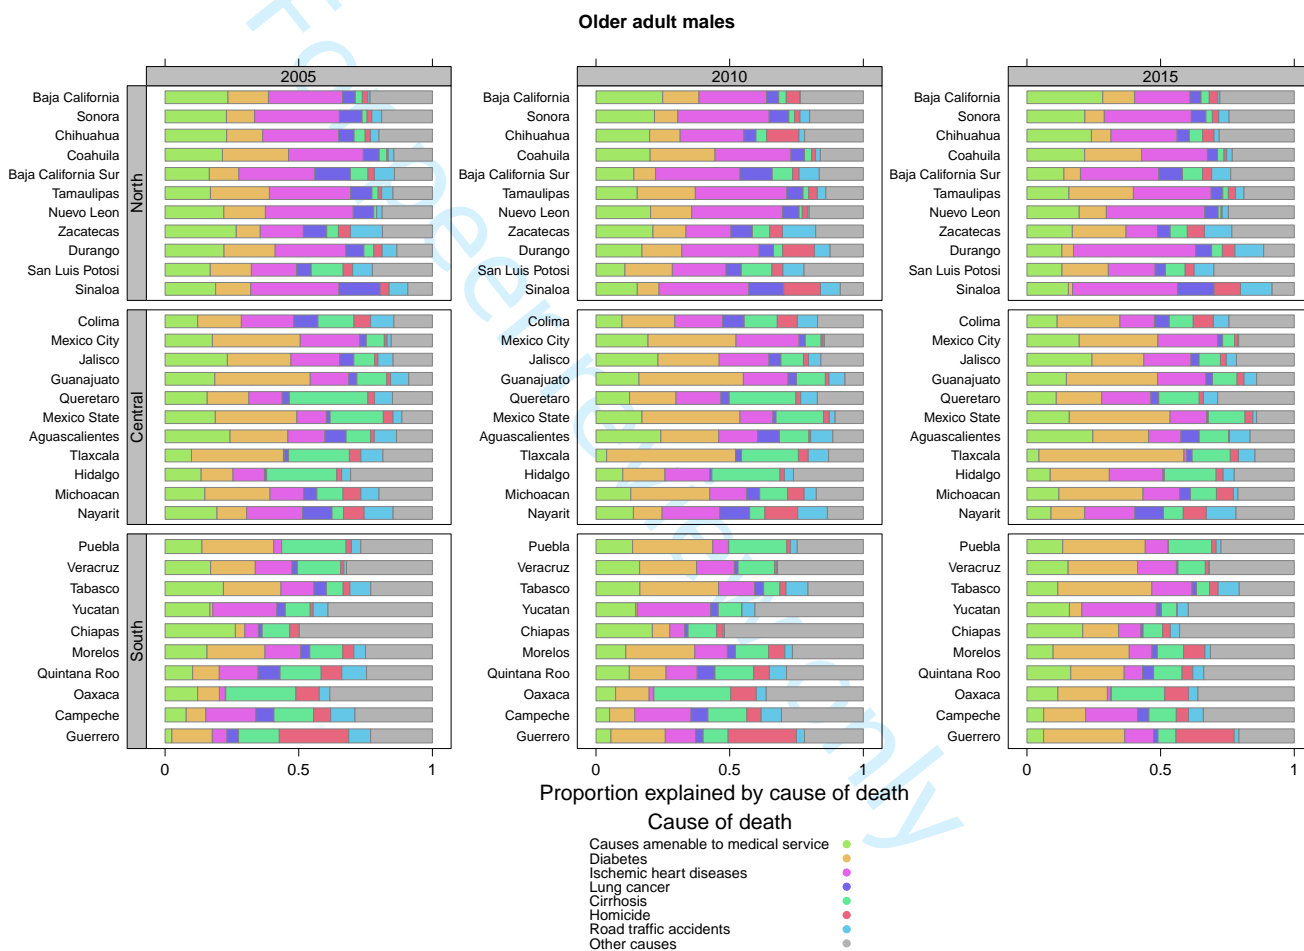

1  
2  
3  
4  
5  
6  
7  
8  
9  
10  
11  
12  
13  
14  
15  
16  
17  
18  
19  
20  
21  
22  
23  
24  
25  
26  
27  
28  
29  
30  
31  
32  
33  
34  
35  
36  
37  
38  
39  
40  
41  
42  
43  
44  
45  
46  
47  
48  
49  
50  
51  
52  
53  
54  
55  
56  
57  
58  
59  
60

Figure 18: Proportion by cause of death from benchmark mortality for older female adults (ages 50-84).  
Source: own calculations.

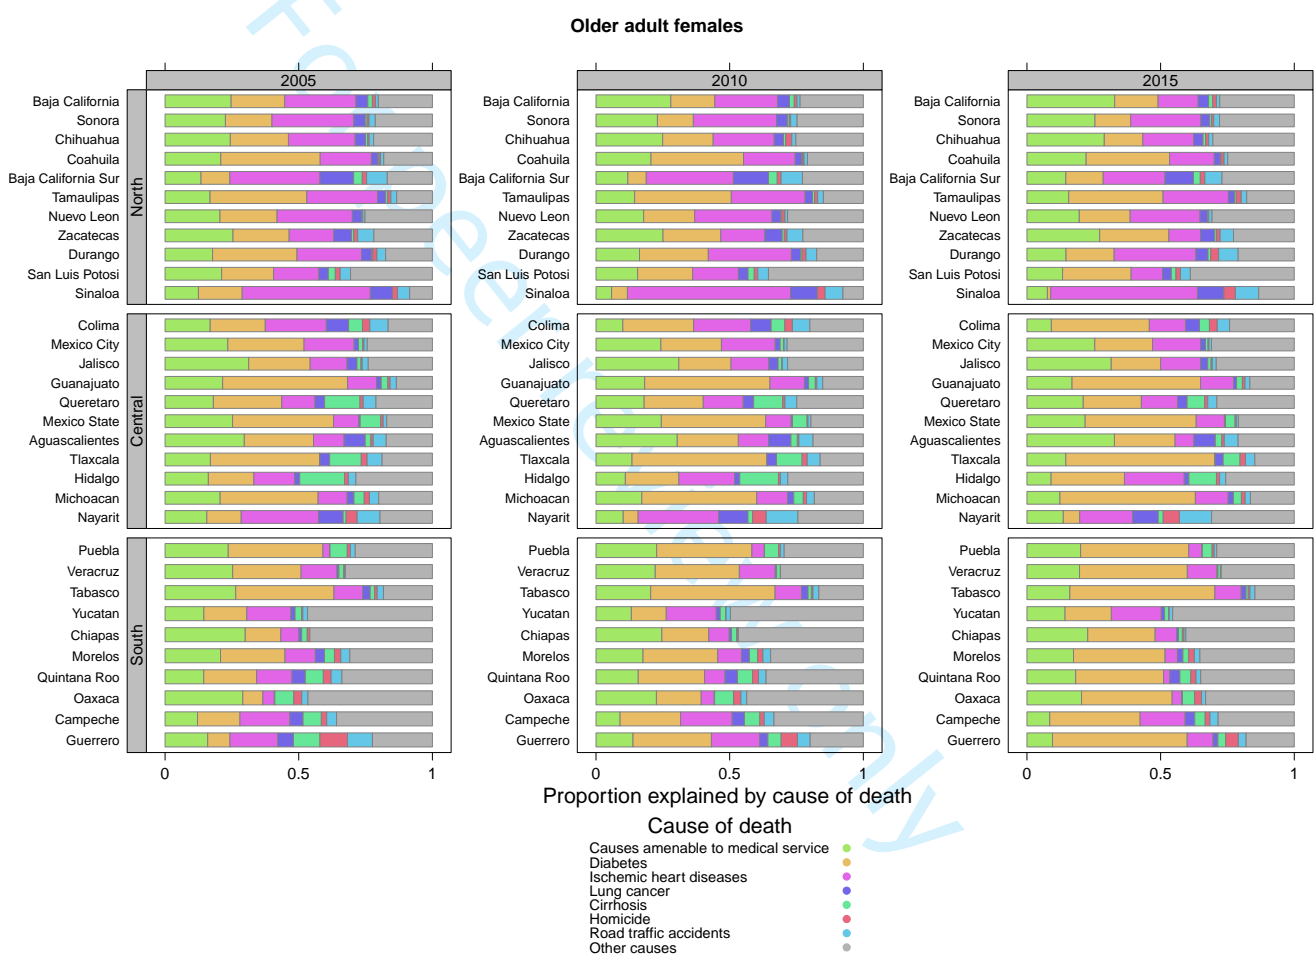

# BMJ Open

## Inequalities and deterioration in average lifespan among adults in Mexico, 1990-2015: A cross-sectional demographic cause-of-death analysis

|                                 |                                                                                                                                                                                                                                                                                             |
|---------------------------------|---------------------------------------------------------------------------------------------------------------------------------------------------------------------------------------------------------------------------------------------------------------------------------------------|
| Journal:                        | <i>BMJ Open</i>                                                                                                                                                                                                                                                                             |
| Manuscript ID                   | bmjopen-2018-022350.R1                                                                                                                                                                                                                                                                      |
| Article Type:                   | Research                                                                                                                                                                                                                                                                                    |
| Date Submitted by the Author:   | 22-May-2018                                                                                                                                                                                                                                                                                 |
| Complete List of Authors:       | Aburto, José Manuel; Syddansk Universitet Det Sundhedsvidenskabelige Fakultet, Biodemography Unit, Department of Public Health<br>Riffe, Tim; Max-Planck-Institut für Demografische Forschung<br>Canudas-Romo, Vladimir; Australian National University College of Arts and Social Sciences |
| <b>Primary Subject Heading</b>: | Public health                                                                                                                                                                                                                                                                               |
| Secondary Subject Heading:      | Epidemiology, Global health, Health policy                                                                                                                                                                                                                                                  |
| Keywords:                       | health inequality, adult health, mortality, homicides, avoidable mortality                                                                                                                                                                                                                  |
|                                 |                                                                                                                                                                                                                                                                                             |

SCHOLARONE™  
Manuscripts



1  
2  
3 **Title: Inequalities and deterioration in average lifespan among adults in Mexico, 1990-2015: A**  
4 **cross-sectional demographic cause-of-death analysis**  
5

6  
7 **Authors:** José Manuel Aburto, *PhD student (JMA)*<sup>a\*\*†</sup>, Tim Riffe, *Research Scientist (TR)*<sup>b†</sup> & Vla-  
8 dimir Canudas-Romo, *Associate Professor (VCR)*<sup>c</sup>

9 **Author affiliations:**

10 <sup>a</sup> Institute of Public Health-Unit of Biodemography, University of Southern Denmark, Odense  
11 5000, Denmark.

12 <sup>b</sup> Max Planck Institute for Demographic Research, Rostock 18057, Germany

13 <sup>c</sup> School of Demography, Australian National University, ACT 0200, Australia

14 <sup>†</sup> These authors contributed equally to the paper

15 <sup>\*</sup>The manuscript's guarantor.  
16  
17

18  
19 **Corresponding author:** José Manuel Aburto: [jmaburto@health.sdu.dk](mailto:jmaburto@health.sdu.dk), T: +45 65509416  
20

21 *The Corresponding Author has the right to grant on behalf of all authors and does grant on be-*  
22 *half of all authors, an exclusive licence (or non exclusive for government employees) on a world-*  
23 *wide basis to the BMJ Publishing Group Ltd to permit this article (if accepted) to be published in*  
24 *BMJ editions and any other BMJ PGL products and sublicences such use and exploit all subsidiary*  
25 *rights, as set out in our licence.*  
26  
27  
28  
29  
30  
31  
32  
33  
34  
35  
36  
37  
38  
39  
40  
41  
42  
43  
44  
45  
46  
47  
48  
49  
50  
51  
52  
53  
54  
55  
56  
57  
58  
59  
60

**Keywords** health inequalities, adult health, , mortality, violence, avoidable mortality

### Abstract

**Objective:** To quantify the effect of medically-amenable conditions, diabetes, ischemic heart diseases, lung cancer, cirrhosis, suicides, homicides and road-traffic accidents on longevity in Mexico during 1990-2015.

**Design:** Retrospective cross-sectional demographic analysis using aggregated data.

**Setting:** Vital statistics from the Mexican civil registration system.

**Participants:** Aggregated national data (from 91.2 million people in 1995 to 119.9 in 2015) grouped in 64 populations (32 Mexican-states [including Mexico City] by sex) with cause-of-death data.

**Main outcome measures:** Cause-specific contributions to the gap in life expectancy in three age groups (0-14, 15-49 and 50-84) with a low-mortality.

**Results:** The population below age 15 shows improvements in survival. Average survival below 15 over states was 14.82 (95% confidence interval, 14.76 to 14.88) and 14.78 years (14.70 to 14.86) in 2015, for females and males respectively. However, the adult population aged 15 to 49 shows deterioration among males after 2006 in almost every state due to an increasing homicides and a slow recovery thereafter. Out of 35 potential years, females and males live on average 34.57 (34.48 to 34.67) and 33.80 (33.34 to 34.27), respectively. Adults aged 50 to 84 show an unexpected decrease in the low mortality benchmark, indicating nationwide deterioration in both females and males with average survival of 28.59 (27.43 to 29.75) and 26.52 (25.33 to 27.73) out of 35, respectively. State gaps from the benchmark were mainly caused by ischemic heart diseases, diabetes, cirrhosis and homicides. We find large health disparities between states, particularly for the adult population after 2005.

**Conclusions:** Mexico has succeeded in reducing mortality and between-state inequalities in children. However, the adult population is becoming vulnerable as it has not been able to reduce the burden of conditions amenable to health services and violence. This has led to large health disparities between Mexican states in the last 25 years.

### Strengths and limitations of this study

- We analyze nine cause-of-death groups using the concept of avoidable/amenable mortality that enables us to capture recent changes in mortality in Mexico.
- We introduce a methodology to quantify the impact of medically amenable mortality and behavior related conditions on life expectancy relative to a low mortality benchmark.
- We analyze patterns in life expectancy for different age groups over time (1995-2015) and simultaneously account for changes in causes of death and inequality between states that have undergone major social and public health transitions.
- Mortality data from Mexico are likely to present inaccuracies in cause-of-death classification due to comorbidities, particularly at older ages.
- Our estimates regarding homicide mortality are likely to be underestimated due to inaccurate practices regarding counting, reporting, and due to the large number of missing individuals in Mexico

### Introduction

The second half of the 20th century was marked by sizable improvements in mortality, living conditions, and health in most Latin American countries.<sup>1</sup> In Mexico, these improvements have slowed down recently due to opposing trends in particular causes of death. For instance, homicide and diabetes increased during the first decade of the 2000's, even as infectious and respiratory diseases continued to fall over the same period. While life expectancy at birth increased by 4.3 years for males (from 67.6 to 71.9) and 3.4 years for females (from 73.8 to 77.2) between 1990 and 2000,<sup>2</sup> between 2000 and 2010, life expectancy at birth entered into a period of stagnation for males and slowed progress for females.<sup>3</sup>

This period coincides with ongoing public health interventions, such as the Universal Vaccination Program and established health systems (IMSS, ISSSTE), and with the implementation of a Universal Health Coverage program (*Seguro Popular*). The latter program provides primary and secondary health care to the uninsured population and allocates funds to cover catastrophic health expenditures.<sup>4</sup> Further, since 1997 conditional cash transfer programs were introduced to supply incentives for poor families to invest in education, health, and nutrition.<sup>5</sup> Some evidence suggests that Mexico experienced substantial decreases in infant and child mortality, and in the prevalence of acute malnutrition between 1980 and 2000 thanks partially to these interventions.<sup>6</sup> Similarly, by 2012 *Seguro Popular* had provided health insurance coverage to an additional 52 million people in Mexico (or 44.4% of the population), leading to increased access to public health care and protection from the financial consequences of disease.<sup>7</sup>

1  
2  
3 Conditional cash transfers have focused on the poorest states, and *Seguro Popular* was intro-  
4 duced at different times in different states across the country. Although these actions under-  
5 score broad progress in public health interventions, they mask disparities between Mexican  
6 states and the epidemiological patterns for different age groups. For instance, Mexico faces a  
7 rapid aging process in which the interaction between infectious diseases and noncommunicable  
8 conditions can be anticipated in the adult population.<sup>8</sup> Therefore, it is necessary to assess the  
9 varied impacts that these interventions may have had on mortality in Mexican states at differ-  
10 ent ages.<sup>9</sup>

11  
12  
13  
14 One approach to approximate the impact of health care and other interventions, and to reveal  
15 potential areas of improvement is by operationalizing the concept of Avoidable or Amenable  
16 Mortality (hereafter abbreviated AM).<sup>10 11</sup> This categorization of mortality aims to measure the  
17 quality of health service systems by selecting certain causes of death that should not occur in  
18 the presence of effective and timely health care. Therefore, improvements in AM mortality are  
19 expected over time, as has been observed in several countries. For example, among 19 industri-  
20 alized countries, including 14 countries from Western Europe, USA, Canada, Australia, New Zea-  
21 land and Japan, a reduction in AM rates was observed over the past 20 years.<sup>10</sup> Avoidable mor-  
22 tality rates fell, on average, by 17% for males and 14% for females in these countries between  
23 1997 and 2003. However, the USA lagged behind the other countries in this group, while Japan,  
24 France and Australia were the top performers. Despite mortality reductions from cancers and  
25 circulatory diseases for both sexes, disparities between countries persist, with the United States  
26 showing the smallest reductions (around 5%) for both sexes.<sup>10</sup>

27  
28  
29  
30  
31 In Mexico, the components of avoidable mortality had different trends since the late 1990's.  
32 Mortality from infectious diseases and nutrition-related conditions decreased between 2000  
33 and 2004,<sup>12</sup> while deaths related to diabetes and ischemic heart diseases increased in the first  
34 decade of the 2000s.<sup>13</sup> Importantly, increases in the latter causes of death were concentrated in  
35 the poorest states of the country.<sup>13</sup>

36  
37  
38 The objective of this research is twofold. Firstly, analysing mortality trends by cause of death for  
39 all 32 Mexican states, by sex, and over the full period from 1990 to 2015. Thereby complement-  
40 ing previous studies focusing on earlier years of the 21st century.<sup>3 13-16</sup> This choice of period co-  
41 vers several public health interventions and captures several major trends in state and cause-of-  
42 death variation. We further segment AM into health intervention-related and behavior-related  
43 AM causes that capture the epidemiological patterns of Mexico.<sup>14</sup> Secondly, our work differen-  
44 tiates from earlier studies by comparing state mortality patterns with an easy-to-understand  
45 low-mortality benchmark calculated for large age groups (i.e. 0-14, 15-49 and 50-84). This con-  
46 cept has been previously used in mortality studies.<sup>17-19</sup> Deviations from the low-mortality  
47 benchmark indicate a strong potential for improvement.

48  
49  
50  
51  
52 We hypothesize age-dependent variations in mortality outcomes. In particular, we expect con-  
53 vergence between states and improvement in survival for young people, since public health  
54 interventions are mainly focused on infant and child health. For instance, the vaccination pro-  
55 gram and *Seguro Popular* aim to fully cover children in the entire country, and recent evidence  
56

1  
2  
3 suggests a decrease in mortality below age 15 due to a decline in infectious and respiratory dis-  
4 eases.<sup>20</sup> On the contrary, we expect little improvement in survival for the young-adult popula-  
5 tion due to the sudden and egregious rise in homicide mortality.<sup>21</sup> We foresee health deteriora-  
6 tion among older adults due to documented increases in diabetes mortality.<sup>20</sup> Although every  
7 state has the commitment to provide universal coverage and equitable access to health care,  
8 we anticipate disparities in mortality improvements between states due to heterogeneous epi-  
9 demiological transitions among states,<sup>16</sup> and differences in how health care programs have been  
10 delivered to the population.<sup>22</sup>  
11  
12  
13  
14

## 15 **Data sources & methods**

16  
17  
18 Our analyses are based on publicly available anonymized datasets. We used death register mi-  
19 crodata files produced by the Mexican Statistical Office (INEGI) for years 1990 to 2015.<sup>23</sup> From  
20 these data, information on causes of death by single age, sex, and state of residence at the time  
21 of death was extracted. Population estimates from 1990 to 2015 came from the Mexican Popu-  
22 lation Council (CONAPO).<sup>24</sup> These population estimates adjust for age misstatement, under-  
23 counting, and interstate and international migration. Death counts and estimates of the popula-  
24 tion exposed to risk were used to calculate cause-age-specific death rates by sex for each state  
25 from 1990 to 2015.  
26  
27  
28

### 29 *Classification of Causes of Death*

30 To classify deaths we use the concept of “Avoidable/Amenable” Mortality (AM).<sup>10 11</sup> We group  
31 causes of death into nine categories based on previous classifications that has recently been  
32 adapted to the case of Mexico.<sup>14</sup> The first category refers to those conditions that are suscepti-  
33 ble to medical intervention, such as infectious and respiratory diseases, some cancers and circula-  
34 tory conditions, and birth conditions, among others. It is labeled “Causes amenable to medical  
35 service”. We separate diabetes, ischemic heart diseases (IHD), lung cancer, and cirrhosis as sub-  
36 categories of AM because these causes are susceptible to both health behavior and medical  
37 service, and because the first two represent major causes of death in Mexican adults.<sup>16</sup> Like-  
38 wise, we separate homicide, suicide and road traffic accidents because they have emerged as  
39 leading causes of death among young people, and the first one recently had a sizeable impact  
40 on life expectancy in Mexico.<sup>14</sup> Remaining causes were grouped into a single category labeled  
41 “Other causes”.  
42  
43  
44  
45

46 Death data were originally classified according to the International Classification of Diseases  
47 (ICD), revision 9 for years 1990 to 1997 and revision 10 for 1998 to 2015 (see Additional file 1  
48 Table 1 for details on ICD codes for each category). To check the validity of these cause-of-death  
49 codes in Mexico, we performed a sensitivity analysis and did not find major ruptures in mortality  
50 trends by AM classification (See Additional file 1, Figure 1).  
51  
52

53 Comorbidity in the old age population has increased in Mexico.<sup>25</sup> As a result inaccuracies may  
54 arise in cause of death registration due to problems associated with medical diagnosis, and se-  
55 lection and coding of the main cause of death. Although analyses in these ages should consider  
56  
57  
58  
59

multiple causes of death to better represent old age mortality, it is out of the scope of this study since we focus on the primary cause of death. We truncate our analysis at age 85 to avoid misinterpreting results related to inaccurate cause of death coding practices.

### *Age groups*

We calculate life expectancy in three large age groups to capture mortality differences along the life course. Life expectancy in each age group simply refers to the average years of life lived between two ages conditional on survival to the lower age bound. This measure is also known in demographic analysis as temporary life expectancy.<sup>26</sup> The first age group refers to people aged 0-14. This group is likely to represent improvements in causes amenable to medical service (e.g. infectious diseases and conditions of perinatal period).<sup>3</sup> The second group, aged 15-49, is used to capture the effect of homicide mortality and external causes historically related to the young-adult mortality hump, as well as maternal mortality for women.<sup>27</sup> This age group had an important impact on changes in state life expectancy in the first decade of the 2000s.<sup>14</sup> The third group covers older adults aged 50-84; with similar life expectancy (ages 40-84) used for international cancer comparisons.<sup>28</sup> Older adults are likely to represent a vulnerable group due to deterioration in non-communicable diseases and injury-related mortality in recent years.<sup>16 29</sup>

### *Low mortality benchmark*

Our low-mortality benchmark is calculated on the basis of the lowest observed mortality rates over all states by age, year, cause, and sex. Subsequently, life expectancies are calculated with these rates. This represents the highest potentially achievable life expectancy from the aggregated low mortality profiles. This benchmark is a practical reference because it is based neither on a projection of improvements into the future nor on an arbitrary and likely dissimilar population. The resulting minimum mortality rate schedule has a unique age profile, and it determines our benchmark temporary life expectancy. It can be treated as the best presently achievable mortality assuming perfect diffusion of the best available practices and technologies in Mexico.<sup>19</sup>

### *Methods*

Cause-specific death rates are the basis of all calculations in this work. To mitigate random variations over time and correct for age-heaping, these rates are adjusted in two steps. First, we smooth cause-specific death counts over age and time for each state and sex separately using a 2-d p-spline.<sup>30</sup> Second, we rescale the smoothed cause-specific death rates to sum to the raw all-cause death rates for each sex and state. Period life tables up to age 84 for males and females from 1990 to 2015 and their benchmarks were calculated following standard demographic methods (for life table construction see Chapter 2 of reference 32).<sup>31 32</sup> Temporary life expectancies were calculated<sup>26</sup> (see Additional file 1 for a technical overview and 95% CIs) and cause-specific contributions to the difference between each state and the low mortality benchmark were estimated using standard decomposition techniques.<sup>33</sup> The decomposition method used in this analysis is based on a model of demographic functions that change gradually over time.<sup>33</sup> It is a stepwise-based demographic method and has been successfully used to decompose age and cause-specific effects on life expectancy.<sup>34</sup> We provide a short description in the Supplemental

1  
2  
3 Material and the results are fully reproducible from the R-code provided in the Data Sharing  
4 statement. Finally, the coefficient of variation of the gap between temporary life expectancy in  
5 each age group with the low mortality benchmark was calculated to measure the level of dispar-  
6 ity between states over time. This indicator is relative and has the property that even if tempo-  
7 rary life expectancy refers to different age-ranges, i.e. 0-14,15-49, and 50-84, the values are still  
8 comparable over age-groups and time. In addition, we performed two-way ANOVA and post  
9 hoc tests to analyze disparities in temporary life expectancy between states and age groups in  
10 Mexico.  
11  
12

### 13 14 **Patient involvement**

15  
16 No patients were involved in setting the research question, outcome measures, design of the  
17 study. No patients were asked to advise on the interpretation of the results and there are no  
18 plans on disseminating the results of this research to study participants or the relevant patient  
19 community.  
20  
21  
22

### 23 24 **Results**

#### 25 26 *Trends in life expectancy for Mexican states by age-groups*

27 Figure 1 presents the temporary life expectancies by state for three large age groups: the  
28 youngest (ages 0-14), young adults (15-49) and older adults (50-84), over the period 1990-2015.  
29 Grey lines refer to each of the 32 states; the black lines represent the average over states; and  
30 the blue lines represent the low mortality benchmark. The black line at the top of each panel  
31 indicates the maximum livable years in each age group: 15 for the youngest, and 35 for young  
32 and older adults conditional on surviving to ages 15 and 50, respectively. Any gap between a  
33 state line and the blue line represents potential additional years of life if mortality were to  
34 achieve the low mortality benchmark.  
35  
36  
37

38 All states show improvements in the youngest age group since 1990, approaching the low mor-  
39 tality benchmark, which itself is very close to maximum survival below age 15. This was ob-  
40 served even in the southern states such as Puebla, Chiapas and Tabasco which have lagged in  
41 reducing mortality at these ages throughout the entire period.  
42  
43  
44

45 Life expectancy between ages 15 and 49 shows a sudden drop after 2005 among males in al-  
46 most every state in Mexico. In 2005, young males in this age group had a temporary life expec-  
47 tancy of 33.9 years (95% CI, 33.5 to 34.2) averaged over states. By 2010, the number of states  
48 below this level had increased from 14 to 23. Chihuahua, Sinaloa and Durango, in the northern  
49 region, experienced a substantial mortality shock in 2010 in this age group, and consequently  
50 recorded the largest departures from the low mortality benchmark. In 2015, the state average  
51 (33.8 years, 33.3 to 34.3) had almost recovered to its 2005 level. Trends for females are closer  
52 to the low mortality benchmark.  
53  
54  
55  
56  
57  
58  
59  
60

1  
2  
3 Among older adults, life expectancy between ages 50 and 84 shows stagnation and deteriora-  
4 tion over the entire period of observation. Even the low mortality benchmark exhibits a gradual  
5 downward trend, pointing to a generalized mortality increase. The female state average life ex-  
6 pectancy declined from 28.8 years (27.4 to 30.2) in 1990 to 28.3 years (27.4 to 29.2) in 2010. By  
7 2015, this average only managed to recover to 28.6 years (27.4 to 29.8). Among males, the av-  
8 erage over states decreased from 26.7 years (24.7 to 28.8) in 1990 to 26.3 years (24.9 to 27.6) in  
9 2010, and 26.5 years (25.3 to 27.7) in 2015. Furthermore, we fitted three linear models to both  
10 sexes, combined and independently, and the slope coefficient was significant in all of them at  
11 the level of  $p < .005$ . These results suggest that the decline observed was significant. As with  
12 young adult males, some states experienced deterioration after 2005, with a minor recovery  
13 since 2010.  
14  
15  
16

17  
18 [Figure 1 about here]  
19  
20

### 21 *Health disparities between states and age groups*

22 Figures 2-5 show results for males because they exhibit the largest departures from the low  
23 mortality benchmark and higher inequality. However, results for females are shown in the Addi-  
24 tional file 1.  
25  
26

27 Figure 2 shows trends in inequalities between states in Mexico for males in the three age  
28 groups, as measured by the coefficient of variation (results for females are reported in Addi-  
29 tional file 1, Figure 2). This indicator measures the variation in the gap of temporary life expec-  
30 tancy with the low mortality benchmark between states within the three age groups. Larger  
31 values are related to higher disparities between states. Trends show mixed patterns of conver-  
32 gence with temporary divergence, and with females in all cases showing less between-state  
33 inequality than males over the entire period studied.  
34  
35  
36

37 There are important differences in inequality levels and trends between age groups. Since 1990,  
38 state inequality in life expectancy in the youngest age group has been decreasing. Among fe-  
39 males, young adults show even lower values than the population in the youngest age group.  
40 However, for males in the young adult age-group a crossover in the early 2000's is seen, with  
41 the coefficient of variation increasing after 2005. The highest values are observed in the period  
42 2009-2011. By 2015, state inequalities among young adults had decreased substantially, but still  
43 remain higher than that of the youngest age group. Older adults show substantially higher ine-  
44 quality than the other age groups over the entire period studied, but also show steady conver-  
45 gence between states. From 2013, both males and females show a potential rise in disparities  
46 between states, although could be random variation since it only accounts for 2 years (Addi-  
47 tional file 1 Figure 2).  
48  
49  
50

51  
52 [Figure 2 about here]  
53  
54  
55  
56  
57  
58  
59  
60



1  
2  
3 To illustrate discordance between age groups within each state, Figure 3 shows the state ranking of temporary life expectancy for the years 2010-15 for males in each age group (see Additional file 1, Figure 3 for females' results). States at the top show the highest values in temporary life expectancy, while states in the bottom refer to the lowest values. We chose to highlight the states with most discordant age-rankings. Green and purple lines refer to selected states that show drastic changes in the ranking between different age groups. For example, Sinaloa, in the northern part of Mexico, holds the record life expectancy below age 15; however, young adults (15-49) show one of the lowest values, while older adults are in the sixth position out of 32. Similar trajectories are shown with green lines for Nayarit and Michoacán in the central region, Zacatecas in the North, as well as Morelos and Guerrero from the southern region. Conversely, the pattern of age discordance in Hidalgo, Querétaro and Mexico City from the central region, and Yucatan and Puebla in the South (purple lines) is summarized by changing from a low rank in the youngest age group to a high rank in young adults, followed by low rank in older adults.

21 We performed a two-way ANOVA on temporary life expectancy by state and age-groups controlling for year. There was a statistically significant interaction between the effects of states and age groups [ $F=12.25$ ,  $p < .001$ ] indicating, as shown in Figure 3, that part of the existing variation in the country is due to within-variability in each state. There were also significant differences in temporary life expectancy between age groups [ $p < .001$ ] and states [ $p < .001$ ] reflecting between-state variability, as shown in Figure 2.

31 [Figure 3 about here]

### 35 *Cause-decomposition analysis*

36 In Figures 4 and 5, the Mexican states in each region are arranged according to the largest gap with the low mortality benchmark among older adult males in 2015. Figure 4 shows how causes amenable to medical service, diabetes, ischemic heart diseases (IHD), lung cancer, cirrhosis, homicide, and road traffic accidents contributed to the gap between each state and the low mortality benchmark from 1990 to 2015 for male older adults (ages 50-84). These are the causes of death that contributed the most to holding states back from achieving the low mortality benchmark. Light-yellow colors indicate negligible contributions, which means that are very close to the low mortality benchmark within each category. Darker red hues indicate larger contributions to the gap. If a particular state is improving during the period, it shows a transition from red to light-yellow.

49 Medically amenable causes of death show gradual improvements in most states from 1990 to 2015, bringing them closer to the benchmark in this category. However, large disparities between states and potential for improvements remain. For example, Baja California, Sonora, Chihuahua and Coahuila from the northern region show substantial contributions to the gap. Diabetes mortality has increasingly contributed to widening the benchmark gap in several states, including Coahuila and Tamaulipas in the North, Mexico City, Guanajuato, Mexico state and

1  
2  
3 Tlaxcala in the central region, and Puebla, Veracruz and Tabasco in the South. Similarly, IHD sig-  
4 nificantly affects the northern part of the country, while cirrhosis is mostly concentrated in the  
5 South. Lung cancer and road traffic accidents have lower contributions to the benchmark gap,  
6 but these remain important causes of death. Homicides increased the gap in this age group in  
7 some states after 2005, such as Chihuahua, Durango and Sinaloa in the North, Colima, Michoa-  
8 cán and Nayarit in the central region, and Guerrero in the South.  
9  
10

11 [Figure 4 about here]  
12  
13

14 Females show similar regional patterns to males, albeit of lower magnitude. For males, causes  
15 amenable to medical service, diabetes, and IHD contributed the largest share to the gap with  
16 the low mortality benchmark among older adult females. In the youngest age group, improve-  
17 ments in life expectancy and in reducing the gap with the low mortality benchmark were mainly  
18 driven by causes amenable to medical service among both females and males. Finally, homicide  
19 mortality and road traffic accidents are the main drivers of the gap with the benchmark among  
20 young male adults (ages 15-49). Importantly, homicides contributed more than 2.5 years to the  
21 gap with the low mortality benchmark in 2010 in the northern state of Chihuahua, and several  
22 states from the North and South of Mexico showed substantial impacts from homicide after  
23 2005. Results for all age-groups are shown in Additional file 1, Figures 4-9.  
24  
25  
26  
27  
28

#### 29 *Potential gains and causes of death in 2015* 30

31 Figure 5 breaks down the state-specific low mortality benchmark gap for males aged 50-84 into  
32 potential gains and their cause of death composition. The left panel shows the potential gains  
33 for older adults if the low mortality benchmark were achieved for each state in 2015. The right  
34 panel shows the proportion of potential gains due to specific causes of death in the same year.  
35  
36

37 Every state in Mexico could increase survival by at least one year in older adult ages if they were  
38 to achieve the low mortality benchmark. However, for 17 of them the gap with the benchmark  
39 is higher than 2 years, and for 3 states in the northern region it is greater than 3 years. For fe-  
40 males, with the exception of Sinaloa and Nayarit, all the states show the potential to gain over  
41 an additional year of life between ages 50-84.  
42  
43

44 More than half of these potential gains in life expectancy between ages 50 and 84 are due to  
45 medically amenable causes, diabetes, IHD, and cirrhosis in every state in Mexico (right panel).  
46 This is true also for females. Although older males show lower impact of homicide mortality on  
47 potential gains compared to young adult males (15-49), its effect is present in almost every  
48 state, particularly in Guerrero, Morelos in the South, Nayarit and Colima in the central region,  
49 and Sinaloa in the North. Results for all the age groups for the years 2005, 2010, and 2015 are  
50 shown in the Additional file 1, Figures 10-18.  
51  
52  
53

54 [Figure 5 about here]  
55  
56  
57  
58  
59  
60

## Discussion

In Mexico since 1990, life expectancy in three large age groups has followed discordant patterns of rise, stagnation, and deterioration. Such patterns have been driven mainly by causes of death that are amenable to medical service (such as infectious and respiratory diseases) and health behaviors (such as homicides, suicide, diabetes, IHD, and cirrhosis) as subcategories of the broader concept of Avoidable/Amenable mortality (AM). Patterns in these two large cause-of-death categories led to contrasting levels of inequality in the country.

Life expectancy below age 15 converged towards the low mortality benchmark and maximum survival in all 32 Mexican states. These results underscore public health interventions aimed at youngest ages. This is supported by evidence that vaccination coverage has been achieved for the entire young population, and that health insurance coverage has improved, due to vaccination programs and the implementation of *Seguro Popular* along with previous established health systems, respectively.<sup>9</sup> Causes amenable to medical service are at the heart of such improvements, consisting of decreases in infectious and respiratory diseases associated with public health interventions targeting children.<sup>6</sup> For example, Puebla and Tlaxcala (in the South and central regions respectively) were the states with the lowest life expectancy below age 15 in 1990 and have improved by more than half a year since then. Moreover, the average over states improved from 14.5 in 1990 to 14.8 in 2015, with no state below 14.7. As a result of continuous and nationwide convergence towards the low mortality benchmark, inequalities between states in life expectancy below age 15 have been reduced.

Opposing the optimistic trend in the under-15 population, increases in homicide mortality reversed gains in male life expectancy, particularly between ages 15-49. These results are consistent with previous studies quantifying the effect of homicide mortality on the stagnation of national life expectancy at birth in the first decade of the 21st century,<sup>3</sup> and with the reversal experienced in life expectancy in most states between 2005 and 2010.<sup>14</sup> Our results extend such findings by adding five years of data and segmenting by specific age groups. We found that after ten years of the unexpected rise in homicide mortality, most states have experienced a slow and partial recovery since 2010. However, the impact of homicide is still higher than the levels observed in 2005. Between 2010 and 2015, this cause of death accounted for most of the gap between states and the low mortality benchmark in ages 15-49. For this age group, the states that show the greatest benchmark gap for homicide in 2015 are Guerrero in the South, and Sinaloa and Chihuahua in the North, which could gain one year, and half a year (each) respectively if homicides were reduced to the level of the southern state of Yucatán, which in this case makes up 100% of the benchmark. Moreover, health inequalities in life expectancy between states followed the rise in homicides after 2005 (Figure 2), and the considerable discordance between age-groups (Figure 3) was likely due in great part to homicide mortality in ages 15-49. It is unclear how these levels of state life expectancy will change with the new reports which highlight a three year increase in homicide in Mexico.<sup>23,ii</sup> Further, the exposure that people have had to violence has triggered mental health problems, e.g. population perceived vulnerability.<sup>15</sup> At the same time suicide is strongly linked to mental disorders.<sup>35</sup> Thus, if the Mexican health system

1  
2  
3 does not have proper interventions to handle the mental health needs of the population, an  
4 increase in suicides might be observed in the future.  
5

6  
7 The population aged 50-84 shows the largest low mortality benchmark gap in both females and  
8 males. Out of 35 livable years in this age group, females lived on average 28.6 years and males  
9 26.5 in 2015 without any clear improvement in the 26 years since 1990. Even the low mortality  
10 benchmark itself shows a downward trend for males and females (Figure 1). Moreover, this age  
11 group exhibits the highest inequality between states in the last 26 years. Our results show that  
12 causes of death holding states back from the low mortality benchmark vary between regions.  
13 Causes amenable to medical service showed gradual improvements in almost every state since  
14 1990. However, in some states of the northern region such as Baja California, Sonora, and Chi-  
15 huahua, these causes of death still show large room for improvements among older adults. Dia-  
16 betes, Ischemic Heart Diseases (IHD) and cirrhosis account for the majority of the gap with the  
17 benchmark mortality with large regional differences. For example, IHD is mostly concentrated in  
18 the North (Figure 4), while cirrhosis and diabetes show a stronger impact in the central and  
19 southern regions. These results are supported by previous evidence documenting an increase in  
20 adult mortality rates from chronic kidney disease, diabetes, and cirrhosis since 2000.<sup>16</sup> Lung  
21 cancer and homicides had a lower impact on life expectancy for this age group, and both are  
22 higher in the northern part of the country.  
23  
24  
25  
26

### 27 **Strengths and limitations of the study**

28 The methodology we performed enables to measure the impact of medically amenable mortality  
29 and behavior-related mortality on life expectancy relative to a low mortality benchmark in  
30 three large age groups. It allows to analyze patterns in life expectancy for different age groups  
31 over time and simultaneously account for changes in causes of death and inequality between  
32 populations that have undergone major social and public health transitions. Therefore, it is im-  
33 perative to consider the effect of different causes of death to estimate the effectiveness of pub-  
34 lic health and policy interventions.  
35  
36  
37

38 The limitations of our study should be mentioned. First, Mortality data from Mexico are likely to  
39 present inaccuracies in cause-of-death classification due to comorbidities, particularly at older  
40 ages.<sup>36</sup> To mitigate this, we focus on ages below 85 and broad groups of causes of death. In ad-  
41 dition, road traffic accidents and homicides may happen not in the place of residence but in  
42 another state, which might cause differences in state specific mortality. Moreover, our esti-  
43 mates regarding homicide mortality are likely to be underestimated due to inaccurate practices  
44 regarding counting, reporting, and due to the large number of missing individuals in Mexico.<sup>37 38</sup>  
45 Similarly, in 1997 a change in diagnosis criterion for diabetes took place, and this could have an  
46 impact on trends of mortality caused by diabetes in years adjacent to 1997.<sup>39</sup> In addition, un-  
47 derreported deaths and ill-defined causes of death could potentially bias our results. Mexico is  
48 among the countries with high-quality data according with the Pan American Health Organiza-  
49 tion's criteria. Underreported deaths are estimated to be around 0.8%,<sup>40 41</sup> while ill-defined  
50 causes of death represented 2.1% in the beginning of the century and has decreased to 1.7%  
51 more recently.<sup>40</sup> Therefore, we expect our main findings to hold given the small percentages of  
52 ill-defined and underreported deaths. Finally, small population sizes could bias our results. As a  
53  
54  
55  
56  
57

1  
2  
3 robustness check, we calculated Confidence Intervals (95%) for all our estimates of temporary  
4 life expectancy, including the benchmark (Supplementary material), and did not find major dif-  
5 ferences with our main results.  
6  
7

8 Avoidable mortality should be understood as an indicator of potential weaknesses with respect  
9 to health care and some public health policies and not as a definitive assessment.<sup>10</sup> The amount  
10 of deaths that should be considered within the avoidable classification is not clear<sup>42</sup>. For in-  
11 stance, some researchers consider only 50 percent of heart disease mortality to be avoidable.<sup>43</sup>  
12<sup>44</sup> There is no direct information to precisely measure percentages of avoidable mortality within  
13 cause groups in Mexico. Nonetheless, the difference between a given mortality schedule and  
14 the best mortality schedule of the same year can be conceived of as a minimal definition of  
15 avoidable mortality. The benchmark mortality schedule sets a lower bound to how much mor-  
16 tality could have been avoided. Certainly, even the best mortality schedule will contain ele-  
17 ments of mortality that most would consider avoidable. To the extent that the components of  
18 the benchmark schedule were indeed attained somewhere in Mexico, one can view any excess  
19 mortality with respect to the benchmark schedule as avoidable. We believe this perspective  
20 improves on the AM concept by giving a directly measurable standard against which to estimate  
21 avoidable deaths.  
22  
23  
24  
25  
26  
27

### 28 **Implications of findings**

29  
30 Beyond the mortality implications of the rise in homicide, violence has had a toll on perceived  
31 vulnerability in the country.<sup>15</sup> The recent increase in homicides in some states could trigger an  
32 increase in the perception of vulnerability, which would result in a higher average lifetime fear  
33 in specific states. Although we are not able to link the trends in mortality among young adults in  
34 Mexico with specific public policies, some evidence suggests that the propagation of homicide  
35 mortality is not only a result of the war between drug cartels, but also because of the imple-  
36 mentation of specific policies aimed to mitigate drug cartel operations after 2006.<sup>45</sup> There is no  
37 simple way to lessen the impact of homicide mortality, but it is clear that the government has  
38 not been able to reduce its burden back to levels observed before 2005. Furthermore, state  
39 homicide rates may underestimate the effect of violence in particular localities. For example,  
40 Guerrero in the South, has two of the most dangerous cities in the world,<sup>iii</sup> but no information is  
41 available on the heterogeneity in homicide mortality for the rest of the state.  
42  
43  
44  
45  
46

47 The fact that in 2015 the older adult population of Mexico could add more than one year of life  
48 in every state for males, and in 30 states for females by achieving the benchmark mortality lev-  
49 els, underscores vulnerability in these ages. Public health interventions targeting specific causes  
50 of death for this age group according to the epidemiological profile of each state would not only  
51 increase life expectancy, but it would also forge a path towards more equality between states in  
52 health outcomes. More than 50% of the potential gains in life expectancy between ages 50 and  
53 84 are due to avoidable mortality, and to a large extent mortality related to health behaviors  
54 and medically amenable causes. For instance, obesity and overweight, risk factors for diabetes  
55  
56  
57

1  
2  
3 and IHD, have dramatically increased since the 1990s in developing countries because of the  
4 consumption of cheap, energy-dense food and reduced physical activities.<sup>46</sup> In this sense, Mexi-  
5 co, along with the USA, has the highest rates of overweight and obesity among all OECD coun-  
6 tries<sup>20</sup> and one of the highest in Latin America, along with Chile, El Salvador, Honduras, and Par-  
7aguay.<sup>47</sup> However, obesity prevalence is not homogeneous across Mexico. The highest rates of  
8 obesity are concentrated in the northern and central regions<sup>20</sup> and in urban areas of the coun-  
9 try,<sup>48</sup> which roughly matches our regional pattern of IHD and diabetes mortality.

## 12 13 **Conclusion**

14  
15 Mexico stands today at an advanced stage of the epidemiological transition.<sup>16</sup> However this  
16 transition was achieved rapidly and the health system is ill-prepared for the burden of non-  
17 communicable diseases.<sup>49</sup> The cardiovascular mortality reductions that brought the developed  
18 world into advanced levels of life expectancy trends, still are in progress in Mexico. Neverthe-  
19 less, no single solution is available to reduce behavioral mortality in this country since, as we  
20 show, great heterogeneity in mortality levels exist among its states.

21  
22  
23  
24 Signs of a fragile situation in the health and mortality of the oldest age groups is observed in the  
25 decline in the low mortality benchmark used in our analysis. The aging of the population could  
26 scale up this situation if timely preventive measures are not put in place. Furthermore, a resur-  
27 gence of violent deaths<sup>14 15 21</sup> has created a new burden in Mexican society.

28  
29  
30 As many developing countries, Mexico will have to face these new challenges with a broad  
31 strategy. This should include a continuous and adaptable health system ready for the current  
32 and future health adversities at the physical, mental and societal levels. Many other institutions  
33 will also have to coevolve including importantly the development of an education system that  
34 embraces and encourages physical and healthy activities to diminish risk factors that contribute  
35 to the high prevalence of obesity and cirrhosis in Mexico. Finally, the burden of violence in re-  
36 cent years demonstrates the failure of current policies trying to mitigate violence in the country.  
37 New strategies that replace current ones are needed and embracing evidence based policies  
38 (e.g. drug policies) could be a new venue to eradicate the consequences of violence on the Mex-  
39 ican population.

40  
41  
42  
43 **Contributors:** JMA and TR contributed to data collection, study design, data analysis, and interpretation of the  
44 results, and wrote the first draft of the paper. VCR contributed to the study design, interpretation of the results,  
45 drafting of the paper, and finalizing the paper.

46 **Funding:** JMA acknowledges support from the Max Planck Society, the European Doctoral School of Demography,  
47 and his current institution.

48 **Competing interest statement:** All authors have completed the Unified Competing Interest form and declare: no  
49 support from any organisation for the submitted work; no financial relationships with any organisations that might  
50 have an interest in the submitted work in the previous three years, no other relationships or activities that could  
51 appear to have influenced the submitted work.

52 **Data sharing:** All data used are publicly available in references 22 and 23. All the study is fully replicable at  
53 <https://github.com/jmaburto/DecompMex>

**Transparency:** The lead author\* affirms that this manuscript is an honest, accurate, and transparent account of the study being reported; that no important aspects of the study have been omitted; and that any discrepancies from the study as planned (and, if relevant, registered) have been explained.

**Ethical approval:** No ethical approval was needed from the institutions' boards since we work with anonymized aggregated publicly available datasets.

## Figures

Figure 1. State-specific life expectancy trends (grey), average (black) and low mortality benchmark (blue) for three age groups, the youngest (0-14), young adults (14-49), and older adults (50-84) by sex for the period 1990-2015. Source: calculations based on INEGI and CONAPO files.

Figure 2. Inequality in male life expectancy between states for the youngest (0-14), young adults (15-49) and older adults (50-84), 1990-2015. Source: calculations based on INEGI and CONAPO files.

Figure 3. Discordant age-rankings for average male life expectancy 2010-15 for the youngest (0-14), young adults (14-49), and older adults (50-84). Source: calculations based on INEGI and CONAPO files.

Figure 4. Cause-specific contributions to the gap between states and low mortality benchmark for older male adults (50-84), 1990-2015. Source: calculations based on INEGI and CONAPO files.

Figure 5. State-specific gap with the low mortality benchmark and its cause-of-death composition for older male adults (50-84) in 2015. Source: calculations based on INEGI and CONAPO files.

## References

1. World Health Organization. The world health report 2000: health systems: improving performance: World Health Organization 2000.
2. Mexican Society of Demography. [Demographic reconciliation of Mexico and its states 1990–2010]. Mexico City: SOMEDE-CONAPO; 2011. Conciliación demográfica de México y entidades federativas 1990–2010. Unpublished paper. Spanish2010.
3. Canudas-Romo V, García-Guerrero VM, Echarri-Cánovas CJ. The stagnation of the Mexican male life expectancy in the first decade of the 21st century: the impact of homicides and diabetes mellitus. *J Epidemiol Community Health* 2015;69(1):28-34.
4. Knaul FM, Frenk J. Health insurance in Mexico: achieving universal coverage through structural reform. *Health affairs* 2005;24(6):1467-76.
5. Neufeld LM. The Oportunidades Program and Child Growth: Mexico Perspectives. Handbook of Growth and Growth Monitoring in Health and Disease: Springer 2012:1659-71.
6. Sepúlveda J, Bustreo F, Tapia R, et al. Improvement of child survival in Mexico: the diagonal approach. *The Lancet* 2006;368(9551):2017-27.
7. Knaul FM, González-Pier E, Gómez-Dantés O, et al. The quest for universal health coverage: achieving social protection for all in Mexico. *The Lancet* 2012;380(9849):1259-79.
8. Bygberg I. Double burden of noncommunicable and infectious diseases in developing countries. *Science* 2012;337(6101):1499-501.
9. Urquieta-Salomón JE, Villarreal HJ. Evolution of health coverage in Mexico: evidence of progress and challenges in the Mexican health system. *Health policy and planning* 2015;31(1):28-36.

10. Nolte E, McKee CM. Measuring the health of nations: updating an earlier analysis. *Health affairs* 2008;27(1):58-71.
11. Nolte E, McKee M. Measuring the health of nations: analysis of mortality amenable to health care. *Bmj* 2003;327(7424):1129.
12. Franco-Marina F, Lozano R, Villa B, et al. La mortalidad en México, 2000-2004. Muertes Evitables: magnitud, distribución y tendencias. *Dirección General de Información en Salud, Secretaría de Salud México* 2006:2.
13. Dávila-Cervantes CA, Agudelo-Botero M. Mortalidad evitable en México y su contribución a los años de vida perdidos: Análisis por grado de marginación estatal, 2001-2010. *Papeles de población* 2014;20(82):267-86.
14. Aburto JM, Beltrán-Sánchez H, García-Guerrero VM, et al. Homicides in Mexico reversed life expectancy gains for men and slowed them for women, 2000–10. *Health Affairs* 2016;35(1):88-95.
15. Canudas-Romo V, Aburto JM, García-Guerrero VM, et al. Mexico's epidemic of violence and its public health significance on average length of life. *Journal of epidemiology and community health* 2017;71(2):188-93.
16. Gómez-Dantés H, Fullman N, Lamadrid-Figueroa H, et al. Dissonant health transition in the states of Mexico, 1990–2013: a systematic analysis for the Global Burden of Disease Study 2013. *The Lancet* 2016;388(10058):2386-402.
17. Whelpton PK, Eldridge HT, Seigel JS. Forecasts of the Population of the United States, 1945-1975: US Govt. Print. Off. 1948.
18. Wunsch G. A minimum life-table for Europe. *European Demographic Information Bulletin* 1975;5(1):2-10.
19. Vallin J, Meslé F. Minimum Mortality: A Predictor of Future Progress? *Population-E* 2008;63(04):557-90.
20. González-Pier E, Barraza-Lloréns M, Beyeler N, et al. Mexico's path towards the Sustainable Development Goal for health: an assessment of the feasibility of reducing premature mortality by 40% by 2030. *The Lancet Global Health* 2016;4(10):e714-e25.
21. Gamlin J. Violence and homicide in Mexico: a global health issue. *The Lancet* 2015;385(9968):605-06.
22. Frenk J. Bridging the divide: global lessons from evidence-based health policy in Mexico. *The Lancet* 2006;368(9539):954-61.
23. INEGI. Estadísticas vitales Mortalidad. *National Institute of Statistics Mexico* 2017
24. CONAPO. Mexican Population Council: Population estimates. 2017 [Available from: <https://datos.gob.mx/busca/dataset/activity/proyecciones-de-la-poblacion-de-mexico> accessed 21/4/2017 2017.
25. Patel KV, Peek MK, Wong R, et al. Comorbidity and disability in elderly Mexican and Mexican American adults: findings from Mexico and the southwestern United States. *Journal of aging and health* 2006;18(2):315-29.
26. Arriaga EE. Measuring and explaining the change in life expectancies. *Demography* 1984;21(1):83-96.
27. Canudas-Romo V, Liu L, Zimmerman L, et al. Potential gains in reproductive-aged life expectancy by eliminating maternal mortality: a demographic bonus of achieving MDG 5. *PloS one* 2014;9(2):e86694.
28. Cao B, Bray F, Beltrán-Sánchez H, et al. Benchmarking life expectancy and cancer mortality: global comparison with cardiovascular disease 1981-2010. *Bmj* 2017;357:j2765.
29. González-González C, Sánchez-García S, Juárez-Cedillo T, et al. Health care utilization in the elderly Mexican population: expenditures and determinants. *BMC public health* 2011;11(1):192.
30. Camarda CG. MortalitySmooth: An R Package for Smoothing Poisson Counts with P-Splines. *Journal of Statistical Software* 2012;50:1-24.



- 1
- 2
- 3 31. Wilmoth JR, Andreev K, Jdanov D, et al. Methods protocol for the human mortality database.  
4 *University of California, Berkeley, and Max Planck Institute for Demographic Research, Rostock*  
5 *URL: <http://mortality.org> [version 31/05/2007] 2007;9:10-11.*
- 6
- 7 32. Preston S, Heuveline P, Guillot M. Demography: measuring and modeling population processes 2000.
- 8 33. Horiuchi S, Wilmoth JR, Pletcher SD. A decomposition method based on a model of continuous  
9 change. *Demography* 2008;45(4):785-801.
- 10 34. Aburto JM, van Raalte A. Lifespan dispersion in times of life expectancy fluctuation: the case of  
11 Central and Eastern Europe. 2017
- 12 35. Zalsman G, Hawton K, Wasserman D, et al. Suicide prevention strategies revisited: 10-year systematic  
13 review. *The Lancet Psychiatry* 2016;3(7):646-59.
- 14 36. Hernández B, Ramírez-Villalobos D, Romero M, et al. Assessing quality of medical death certification:  
15 concordance between gold standard diagnosis and underlying cause of death in selected  
16 Mexican hospitals. *Population health metrics* 2011;9(1):38.
- 17 37. Steinberg N. Neither Rights Nor Security: Killings, Torture, and Disappearances in Mexico's War on  
18 Drugs: Human Rights Watch 2011.
- 19 38. Wright MW. Epistemological Ignorances and Fighting for the Disappeared: Lessons from Mexico.  
20 *Antipode* 2017;49(1):249-69.
- 21 39. Gavin JR, Alberti KG, Davidson MB, et al. Report of the expert committee on the diagnosis and  
22 classification of diabetes mellitus. *Diabetes care* 2003;26(SUPPL. 1)
- 23 40. Organization WH. Global health observatory data repository 2018. Available at *who*  
24 *int/gho/data/node main A* 2018;364
- 25 41. Salud OMDI, Salud dPDI. Enfermedades transmisibles y análisis de salud/información y análisis de  
26 Salud: Situación de salud en las Américas: Indicadores Básicos 2013: OPS Washington^ eD. C DC,  
27 2013.
- 28 42. Beltrán-Sánchez H. Avoidable mortality. *International handbook of adult mortality*: Springer  
29 2011:491-508.
- 30 43. Nolte E, McKee CM. In amenable mortality—deaths avoidable through health care—progress in the  
31 US lags that of three European countries. *Health Affairs* 2012;10.1377/hlthaff. 2011.0851.
- 32 44. Holland W. Commentary: should we not go further than descriptions of avoidable mortality?  
33 *International journal of epidemiology* 2003;32(3):447-48.
- 34 45. Espinal-Enríquez J, Larralde H. Analysis of México's Narco-War Network (2007–2011). *PloS one*  
35 2015;10(5):e0126503.
- 36 46. Hossain P, Kavar B, El Nahas M. Obesity and diabetes in the developing world—a growing challenge.  
37 *New England journal of medicine* 2007;356(3):213-15.
- 38 47. Aschner P. Obesity in Latin America. *Metabolic Syndrome: A Comprehensive Textbook* 2016:33-39.
- 39 48. Kuri-Morales P, Emberson J, Alegre-Díaz J, et al. The prevalence of chronic diseases and major disease  
40 risk factors at different ages among 150 000 men and women living in Mexico City: cross-  
41 sectional analyses of a prospective study. *BMC Public Health* 2009;9(1):9.
- 42 49. Rivera JA, Barquera S, Campirano F, et al. Epidemiological and nutritional transition in Mexico: rapid  
43 increase of non-communicable chronic diseases and obesity. *Public health nutrition*  
44 2002;5(1a):113-22.
- 45
- 46
- 47
- 48
- 49
- 50
- 51
- 52
- 53

## Endnotes

---

<sup>i</sup> The percentage of the population aged 65 or older is projected to go from 6.0% in 2015 to 10.2% in 2030 (Reference: CONAPO)

1  
2  
3  
4 ii [<https://www.businessinsider.com.au/homicides-hit-new-high-mexico-alongside-increase-in-robberies-2017-11?r=US&IR=T>]

5  
6 iii [<http://www.economist.com/blogs/graphicdetail/2017/03/daily-chart-23>]

7  
8  
9 **Additional Files**

10 Additional file 1 | Supplemental material  
11  
12  
13  
14  
15  
16  
17  
18  
19  
20  
21  
22  
23  
24  
25  
26  
27  
28  
29  
30  
31  
32  
33  
34  
35  
36  
37  
38  
39  
40  
41  
42  
43  
44  
45  
46  
47  
48  
49  
50  
51  
52  
53  
54  
55  
56  
57  
58  
59  
60

For peer review only

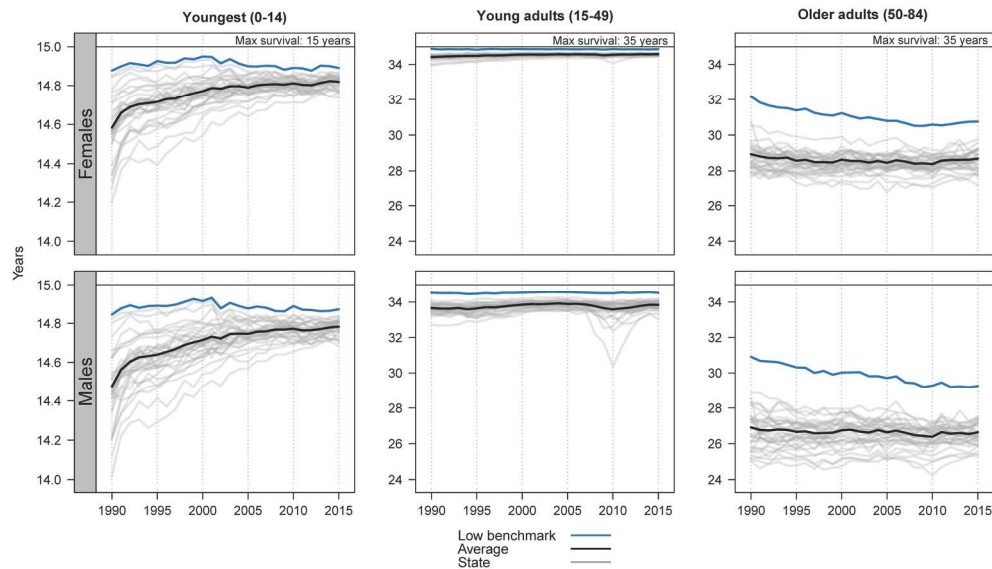

Figure 1. State-specific life expectancy trends (grey), average (black) and low mortality benchmark (blue) for three age groups, the youngest (0-14), young adults (14-49), and older adults (50-84) by sex for the period 1990-2015. Source: calculations based on INEGI and CONAPO files.

177x103mm (300 x 300 DPI)

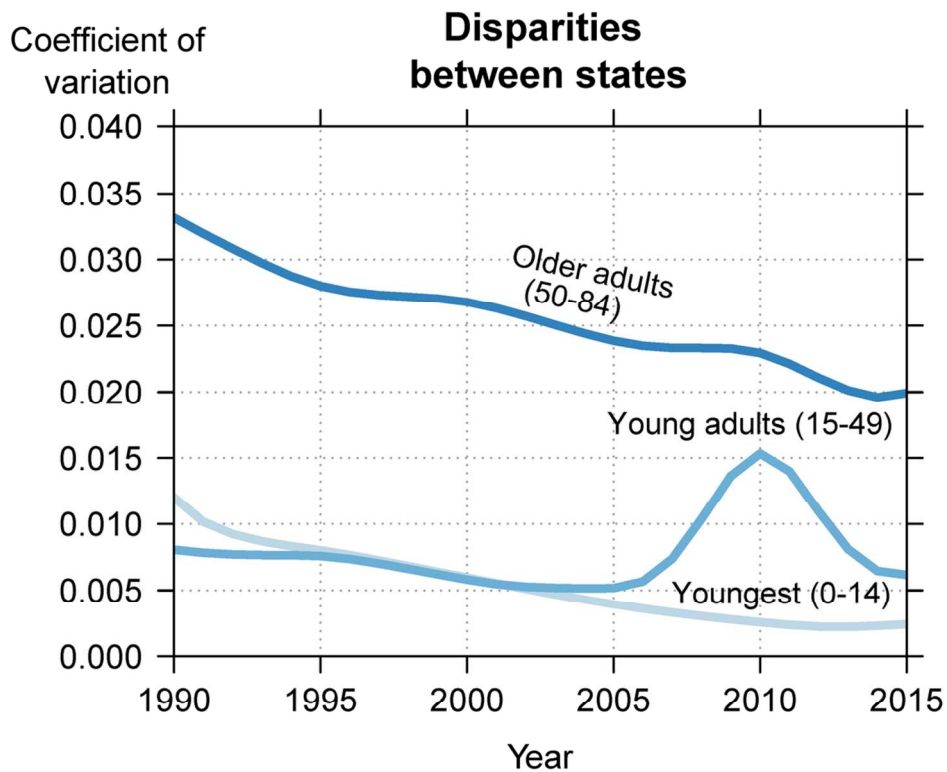

Figure 2. Inequality in male life expectancy between states for the youngest (0-14), young adults (15-49) and older adults (50-84), 1990-2015. Source: calculations based on INEGI and CONAPO files.

101x81mm (300 x 300 DPI)

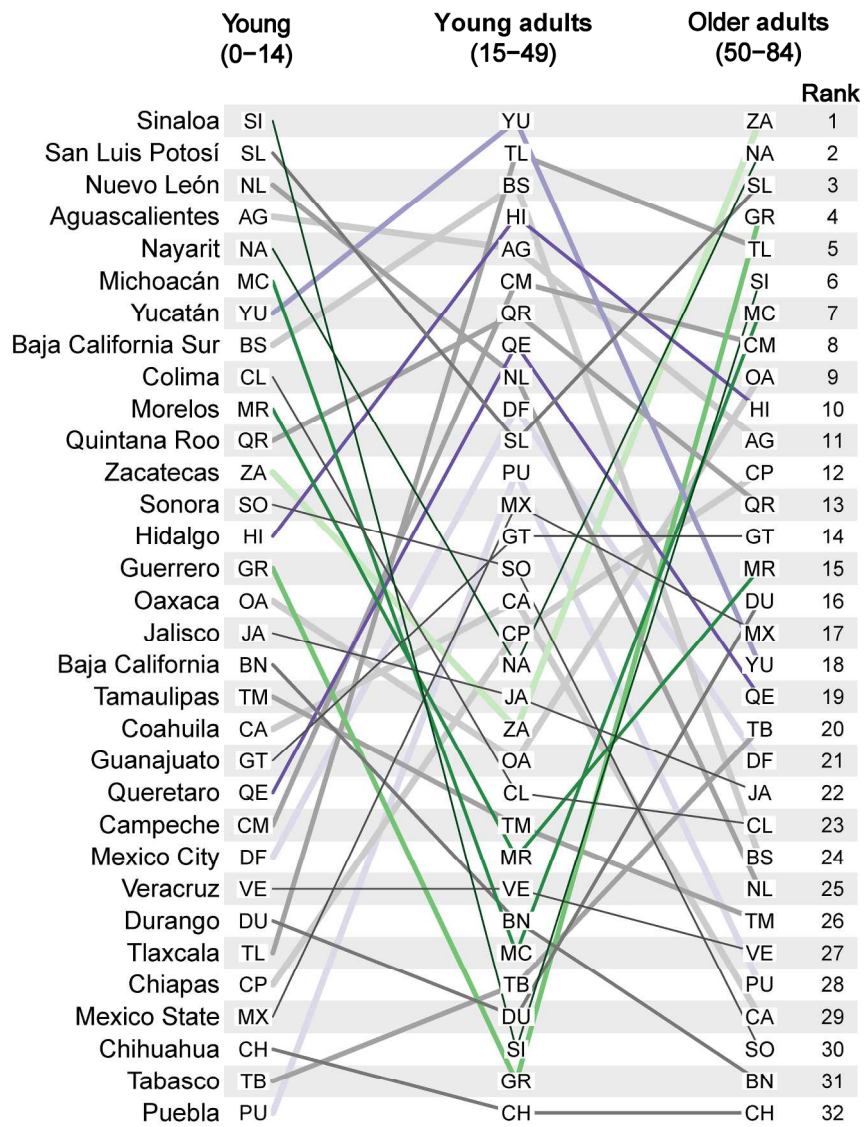

Figure 3. Discordant age-rankings for average male life expectancy 2010-15 for the youngest (0-14), young adults (14-49), and older adults (50-84). Source: calculations based on INEGI and CONAPO files.

203x270mm (300 x 300 DPI)

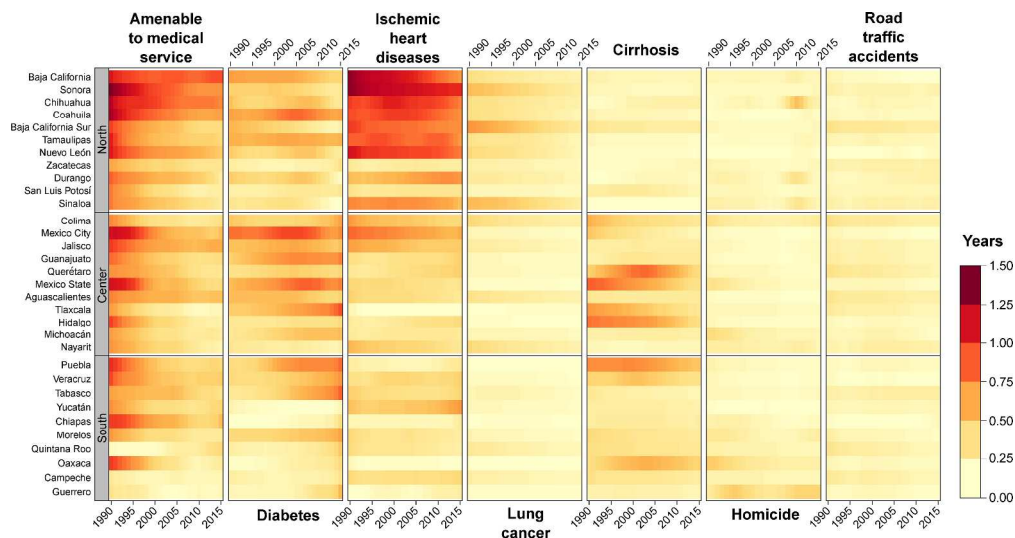

Figure 4. Cause-specific contributions to the gap between states and low mortality benchmark for older male adults (50-84), 1990-2015. Source: calculations based on INEGI and CONAPO files.

511x267mm (300 x 300 DPI)

review only

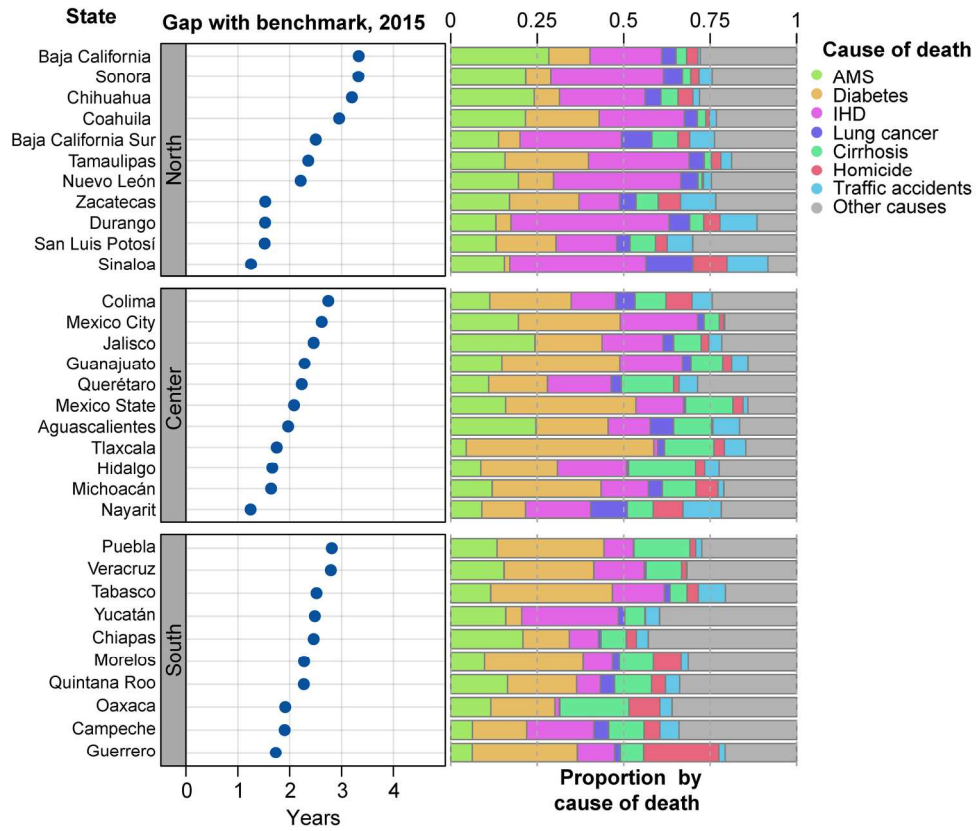

Figure 5. State-specific gap with the low mortality benchmark and its cause-of-death composition for older male adults (50-84) in 2015. Source: calculations based on INEGI and CONAPO files.

177x155mm (300 x 300 DPI)

1  
2  
3  
4  
5  
6  
7  
8  
9  
10  
11  
12  
13  
14  
15  
16  
17  
18  
19  
20  
21  
22  
23

# Inequalities and deterioration in average lifespan among adults in Mexico, 1990-2015: A cross-sectional demographic cause-of-death analysis

14  
15  
16  
17  
18  
19  
20  
21  
22  
23

José Manuel Aburto<sup>1</sup>, Tim Riffe<sup>2</sup>, and Vladimir Canudas-Romo<sup>3</sup>

14  
15  
16  
17  
18  
19  
20  
21  
22  
23

<sup>1</sup>University of Southern Denmark

14  
15  
16  
17  
18  
19  
20  
21  
22  
23

<sup>2</sup>Max Planck Institute for Demographic Research

14  
15  
16  
17  
18  
19  
20  
21  
22  
23

<sup>3</sup>School of Demography, Australian National University

14  
15  
16  
17  
18  
19  
20  
21  
22  
23

May 22, 2018

24  
25  
26  
27  
28  
29  
30  
31  
32  
33  
34  
35  
36  
37  
38  
39  
40  
41  
42  
43  
44  
45  
46  
47  
48  
49  
50  
51  
52  
53  
54  
55  
56  
57  
58  
59  
60

## Abstract

24  
25  
26  
27  
28  
29  
30  
31  
32  
33  
34  
35  
36  
37  
38  
39  
40  
41  
42  
43  
44  
45  
46  
47  
48  
49  
50  
51  
52  
53  
54  
55  
56  
57  
58  
59  
60

**Objective:** To quantify the effect of medically-amenable conditions, diabetes, ischemic heart diseases, lung cancer, cirrhosis, suicides, homicides and road-traffic accidents on longevity in Mexico during 1990-2015.

24  
25  
26  
27  
28  
29  
30  
31  
32  
33  
34  
35  
36  
37  
38  
39  
40  
41  
42  
43  
44  
45  
46  
47  
48  
49  
50  
51  
52  
53  
54  
55  
56  
57  
58  
59  
60

**Design:** Retrospective cross-sectional demographic analysis using aggregated data.

24  
25  
26  
27  
28  
29  
30  
31  
32  
33  
34  
35  
36  
37  
38  
39  
40  
41  
42  
43  
44  
45  
46  
47  
48  
49  
50  
51  
52  
53  
54  
55  
56  
57  
58  
59  
60

**Setting:** Vital statistics from the Mexican civil registration system.

24  
25  
26  
27  
28  
29  
30  
31  
32  
33  
34  
35  
36  
37  
38  
39  
40  
41  
42  
43  
44  
45  
46  
47  
48  
49  
50  
51  
52  
53  
54  
55  
56  
57  
58  
59  
60

**Participants:** Aggregated national data (from 91.2 million people in 1995 to 119.9 in 2015) grouped in 64 populations (32 Mexican-states [including Mexico City] by sex) with cause-of-death data.

24  
25  
26  
27  
28  
29  
30  
31  
32  
33  
34  
35  
36  
37  
38  
39  
40  
41  
42  
43  
44  
45  
46  
47  
48  
49  
50  
51  
52  
53  
54  
55  
56  
57  
58  
59  
60

**Main outcome measures:** Cause-specific contributions to the gap in life expectancy in three age groups (0-14, 15-49 and 50-84) with a low-mortality.

24  
25  
26  
27  
28  
29  
30  
31  
32  
33  
34  
35  
36  
37  
38  
39  
40  
41  
42  
43  
44  
45  
46  
47  
48  
49  
50  
51  
52  
53  
54  
55  
56  
57  
58  
59  
60

**Results:** The population below age 15 shows improvements in survival. Average survival below 15 over states was 14.82 (95% confidence interval, 14.76 to 14.88) and 14.78 years (14.70 to 14.86) in 2015, for females and males respectively. However, the adult population aged 15 to 49 shows deterioration among males after 2006 in almost every state due to an increasing homicides and a slow recovery thereafter. Out of 35 potential years, females and males live on average 34.57 (34.48 to 34.67) and 33.80 (33.34 to 34.27), respectively. Adults aged 50 to 84 show an unexpected decrease in the low mortality benchmark, indicating nationwide deterioration in both females and males with average survival of 28.59 (27.43 to 29.75) and 26.52 (25.33 to 27.73) out of 35, respectively. State gaps from the benchmark were mainly caused by ischemic heart diseases, diabetes, cirrhosis and homicides. We find large health disparities between states, particularly for the adult population after 2005.

24  
25  
26  
27  
28  
29  
30  
31  
32  
33  
34  
35  
36  
37  
38  
39  
40  
41  
42  
43  
44  
45  
46  
47  
48  
49  
50  
51  
52  
53  
54  
55  
56  
57  
58  
59  
60

**Conclusions:** Mexico has succeeded in reducing mortality and between-state inequalities in children. However, the adult population is becoming vulnerable as it has not been able to reduce the burden of conditions amenable to health services and violence. This has led to large health disparities between Mexican states in the last 25 years.



## Supplemental material

Appendix Table 1. Definitions of cause-of-death categories using the 9th and 10th revision of the International Classification of Diseases.

| Category                                                                                                                                                                                                                                                                                                                                                          | ICD-10                                                                                                                                                                      | ICD-9                                                                                                                             |
|-------------------------------------------------------------------------------------------------------------------------------------------------------------------------------------------------------------------------------------------------------------------------------------------------------------------------------------------------------------------|-----------------------------------------------------------------------------------------------------------------------------------------------------------------------------|-----------------------------------------------------------------------------------------------------------------------------------|
| <b>I. Amenable to medical service</b>                                                                                                                                                                                                                                                                                                                             |                                                                                                                                                                             |                                                                                                                                   |
| I.A. AM-Infectious & respiratory diseases : intestinal infections, tuberculosis, zoonotic bacterial diseases, other bacterial diseases, septicemia, poliomyelitis, measles, rubella, infectious hepatitis, ornithosis, rickettsioses/arthropod-borne, syphilis (all forms), yaws, respiratory diseases, influenza & pneumonia, chronic lower respiratory diseases | A00-A09, A16-A19, B90, A20-A26, A28, A32, A33, A35, A36, A37, A40-A41, A80, B05-B06, B15-B19, A70, A68, A75, A77, A50-A64, A66, J00-J08, J20-J39, J60-J99, J09-J18, J40-J47 | 001-009, 010-018, 32, 33, 37, 137, 020-027, 38, 45, 55-56, 70, 73, 080-082, 087, 090-099, 102, 460-479, 500-519, 480-488, 490-496 |
| I.B. AM-Cancers: malignant neoplasm of colon, skin, breast, cervix, prostate, testis, bladder, kidney-Wilm's tumor only, eye, thyroid carcinoma, Hodgkins disease, leukemia                                                                                                                                                                                       | C16,C18-C21, C43-C44, C50, C53, C61, C62, C67, C64, C69, C73, C81, C91-C95                                                                                                  | 153-154, 172-173, 174, 180, 185, 186, 188-189, 190, 193, 201, 204-208                                                             |
| I.C. AM-Circulatory: active/acute rheumatic fever, chronic rheumatic heart disease, hypertensive disease, cerebrovascular disease                                                                                                                                                                                                                                 | I00-I02, I05-I09, I10-I13, I15, I60-I69                                                                                                                                     | 390-392, 393-398, 401-405, 430-438                                                                                                |
| I.D. AM-Birth: maternal deaths (all), congenital cardiovascular anomalies, perinatal deaths (excluding stillbirths)                                                                                                                                                                                                                                               | O00-O99, Q20-Q28, P00-P96                                                                                                                                                   | 630-676, 745-747, 760-779                                                                                                         |
| I.E. AM-Other: disease of thyroid, epilepsy, peptic ulcer, appendicitis, abdominal hernia, cholelithiasis & cholecystitis, nephritis, benign prostatic hyperplasia, misadventures to patients during surgical or medical care, cisticercosis                                                                                                                      | E00-E07, 40-G41, K25-K27, K35-K38, K40-K46, K80-K81, N00-N07, N17-N19, N25-N27, N40, Y60-Y69, Y83-Y84, B69                                                                  | 240-246, 345, 531-533, 540-543, 550-553, 574-575.1, 580-589, 600, E870-E876, E878-E879                                            |
| <b>II. Diabetes</b>                                                                                                                                                                                                                                                                                                                                               | E10-E14                                                                                                                                                                     | 250                                                                                                                               |
| <b>III. Ischemic Heart Diseases (IHD)</b>                                                                                                                                                                                                                                                                                                                         | I20-I25                                                                                                                                                                     | 410-414, 429.2                                                                                                                    |
| <b>IV. Lung cancer</b>                                                                                                                                                                                                                                                                                                                                            | C33-C34                                                                                                                                                                     | 162                                                                                                                               |
| <b>V. Cirrhosis</b>                                                                                                                                                                                                                                                                                                                                               | K70                                                                                                                                                                         | 571.1-571.3                                                                                                                       |
| <b>VI. Homicides</b>                                                                                                                                                                                                                                                                                                                                              | X85-Y09                                                                                                                                                                     | E960-E969                                                                                                                         |
| <b>VII. Road traffic accidents</b>                                                                                                                                                                                                                                                                                                                                | V01-V99                                                                                                                                                                     | E810-E819                                                                                                                         |
| <b>VIII. Suicide and self-inflicted injuries</b>                                                                                                                                                                                                                                                                                                                  | E950-E959                                                                                                                                                                   | X60-X84, Y87.0                                                                                                                    |
| <b>IX. Residual Causes : HIV/AIDS; other cancers and other heart diseases</b>                                                                                                                                                                                                                                                                                     | B20-B24, U03; C00-D48; I00-I99 if not listed above; R00-R99                                                                                                                 | 042-044;140-239; 390-459 if not listed above; 780-799                                                                             |

## Temporary Life Expectancy

Temporary life expectancy between ages  $x_1$  and  $x_2$ , for  $x_1 < x_2$ , is defined as the average years of life lived between these ages according to a given set of mortality rates (Arriaga 1984). We denote this quantity as  ${}_{(x_2-x_1)}e_{x_1}$ , and its benchmark based on minimum death rates for every age and cause of death among the Mexican states for each year as  ${}_{(x_2-x_1)}e_{x_1}^*$ . Defined in terms of the life table survival function,  $\ell(x)$ :

$${}_{(x_2-x_1)}e_{x_1} = \frac{\int_{x_1}^{x_2} \ell(x) dx}{\ell(x_1)} \quad (1)$$

If full survival is achieved, the life expectancy is  $x_2 - x_1$ . For example, if we set  $x_1 = 0$  and  $x_2 = 15$ , and no person dies between the ages 0 and 15, on average the population lives 15 full years.

## Decomposition method

The decomposition method used in this paper relies on a model of demographic functions based on continuous change (Horiuchi et al. 2008). Suppose  $P$  (e.g. temporary life expectancy between ages 15 and 49) is a differentiable function of  $n$  covariates (e.g. each age-cause specific mortality rate) denoted by the vector  $\mathbf{A} = [x_1, x_2, \dots, x_n]^T$ . We assume that  $\mathbf{A}$  is a differentiable function between  $P_1$  and  $P_2$ , then the difference in  $P$  between  $P_1$  and  $P_2$  can be expressed as follows:

$$P_2 - P_1 = \sum_{i=1}^n \int_{x_i(P_1)}^{x_i(P_2)} \frac{\partial P}{\partial x_i} dx_i = \sum_{i=1}^n c_i, \quad (2)$$

where  $c_i$  is the total change in  $P$  produced by changes in the  $i$ -th covariate,  $x_i$ . The  $c_i$ 's in equation (2) were computed by numerical integration following the algorithm suggested by Horiuchi et al. (2008). This method has the advantage of assuming that covariates change gradually along the time dimension.

Figure 1: Cause-specific death counts (different *y*-scale for each cause), 1990-2010.

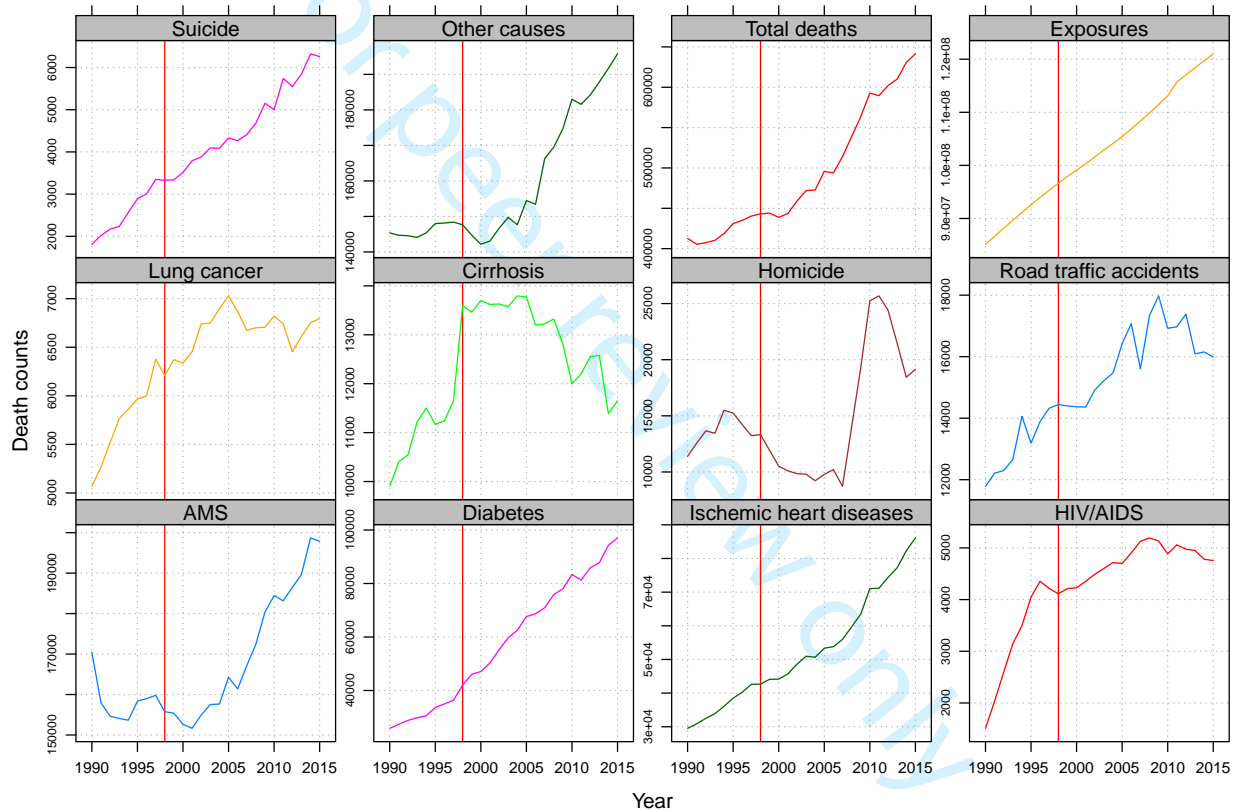

Note: AMS “amenable to medical service”. The red line indicates the change from ICD 9 to ICD 10.

# Robustness check: 95% CIs for male temporary life expectancies

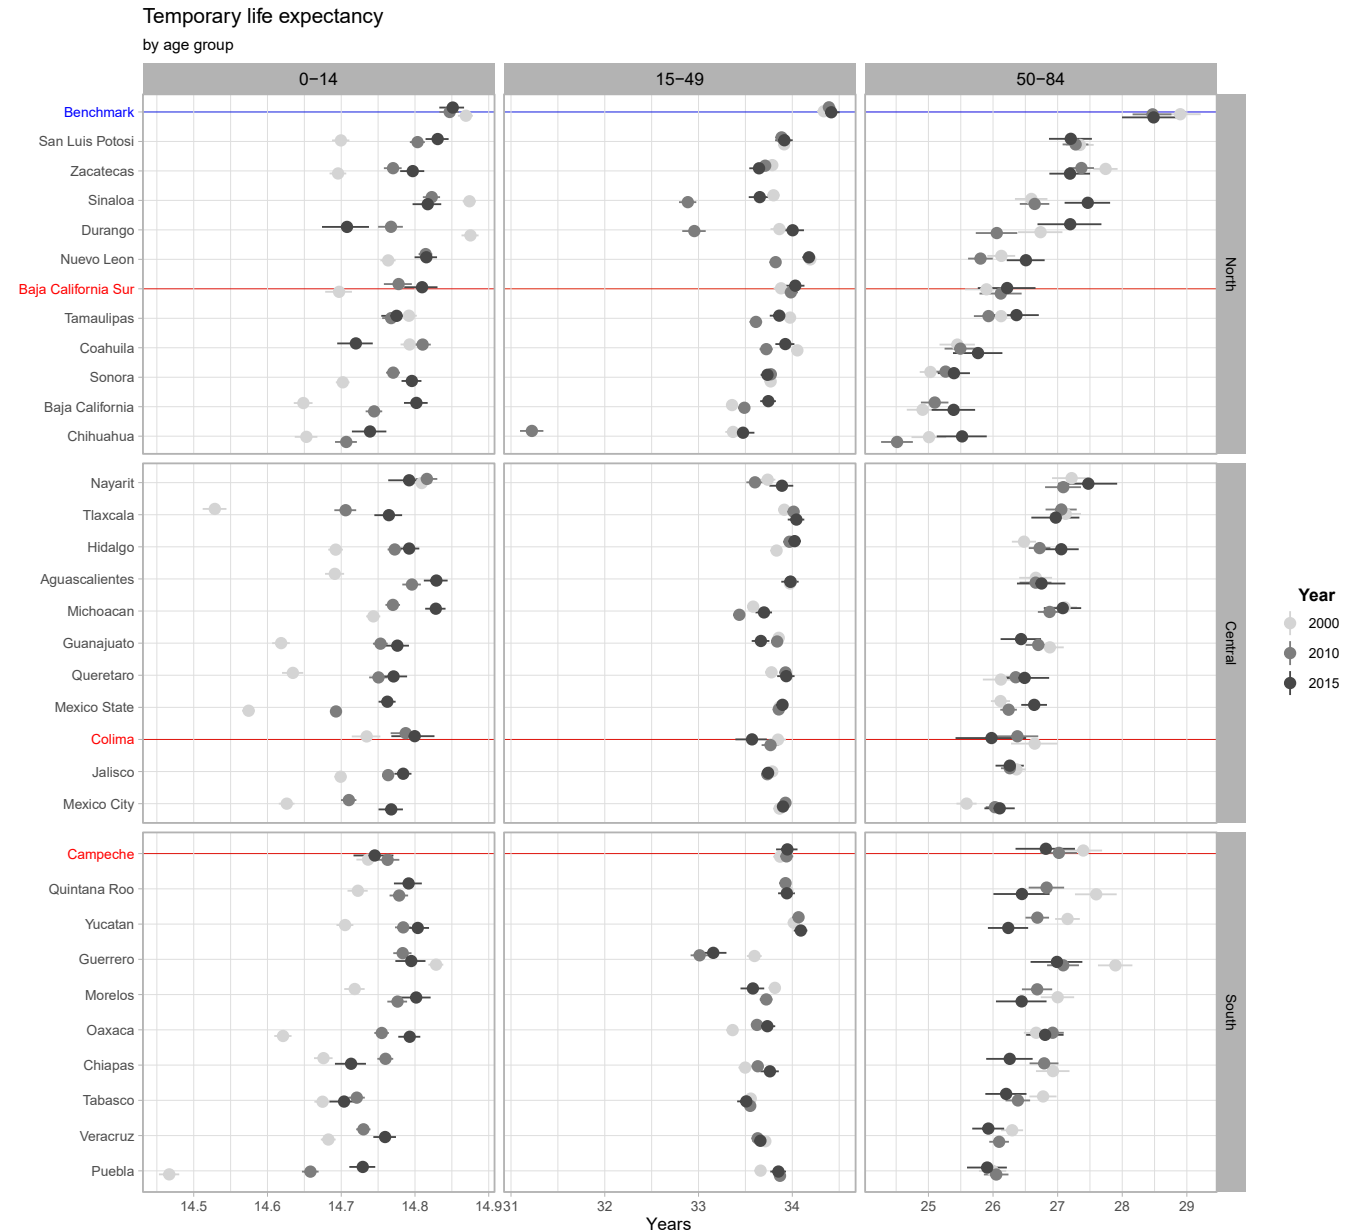

Note: States highlighted in red had less than 1 million population in 2010.

## References

Arriaga, E. E. (1984). Measuring and explaining the change in life expectancies. *Demography*, 21(1):83–96.

Horiuchi, S., Wilmoth, J. R., and Pletcher, S. D. (2008). A decomposition method based on a model of continuous change. *Demography*, 45(4):785–801.

1  
2  
3  
4  
5  
6  
7  
8  
9  
10  
11  
12  
13  
14  
15  
16  
17  
18  
19  
20  
21  
22  
23  
24  
25  
26  
27  
28  
29  
30  
31  
32  
33  
34  
35  
36  
37  
38  
39  
40  
41  
42  
43  
44  
45  
46  
47  
48  
49  
50  
51  
52  
53  
54  
55  
56  
57  
58  
59  
60

Figure 2: Inequality in life expectancy between states for youngest (0-14), young adults (15-49), and older adults (50-84) by sex, 1990-2015.

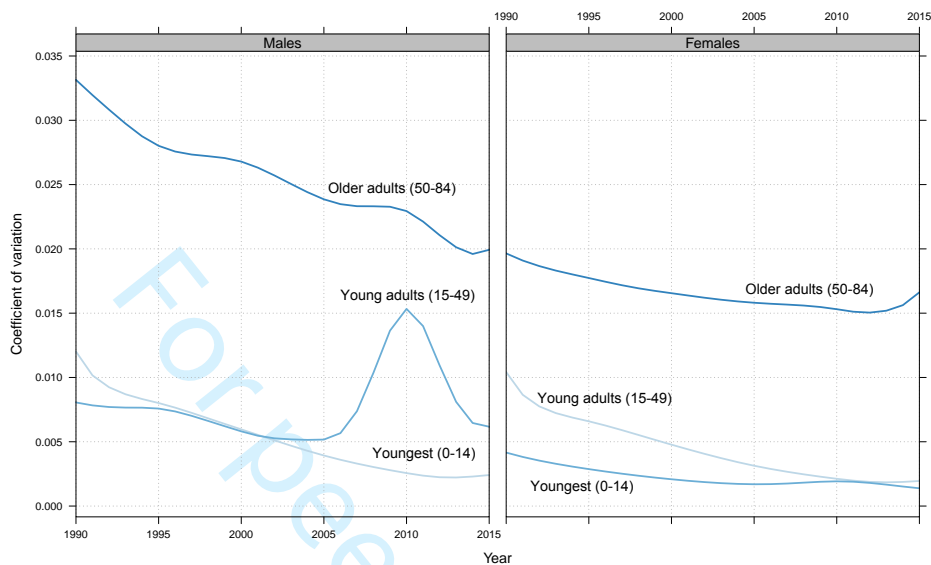

Figure 3: State ranking for average female life expectancy 2010-15 for the youngest (0-14), young adults (15-49), and older adults (50-84).

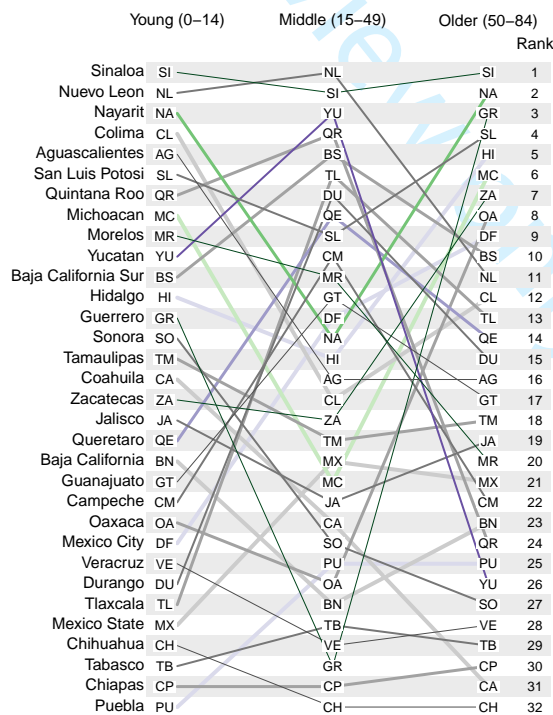

Source: calculations based on INEGI and CONAPO files.

Figure 4: Cause-specific contributions to state differences from low mortality benchmark for older male adults (ages 50-84), 1990-2015. States grouped into three regions. Reproduced from manuscript Figure 4 to have color scale comparable with other Supplementary figures. In subsequent figures 5-9 the color was rescaled to make them comparable over age groups in the supplemental material, the maximum value observed was 2.6 years caused by homicides in Chihuahua in 2010.



Note:  
AMS is “amenable to medical service”, IHD is “ischemic heart diseases”, and RTA is “road traffic accidents”. Source: own calculations.

Figure 5: Cause-specific contributions to state differences from low mortality benchmark for older female adults (ages 50-84), 1990-2015.

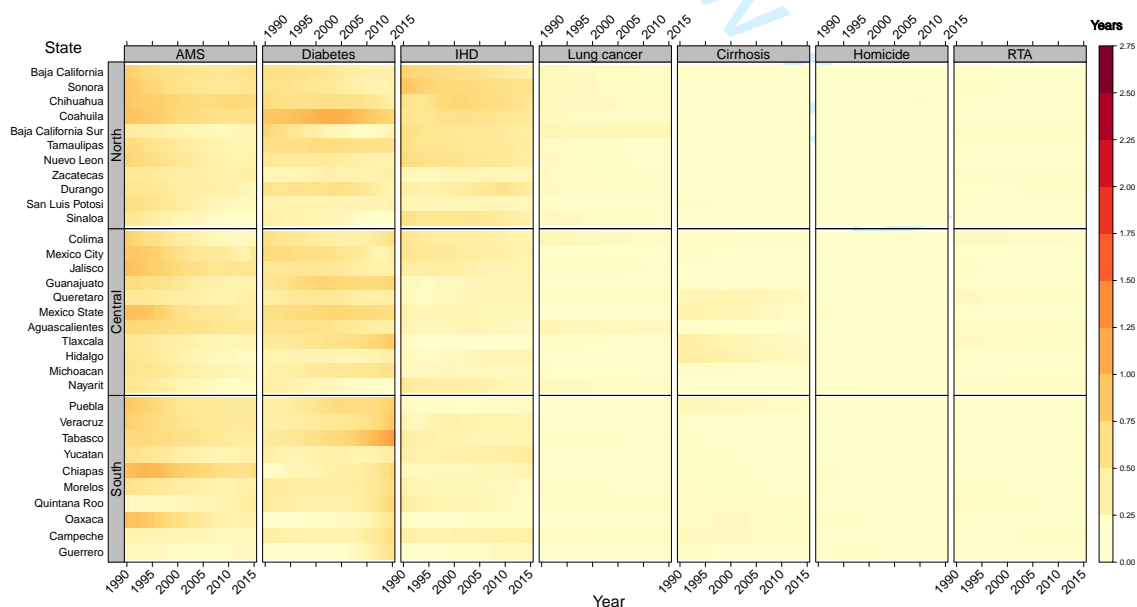

Note:  
AMS is “amenable to medical service”, IHD is “ischemic heart diseases”, and RTA is “road traffic accidents”. Source: own calculations.

Figure 6: Cause-specific contributions to state differences from low mortality benchmark for male youngest population (ages 0-14), 1990-2015.



Note: AMS is “amenable to medical service”, IHD is “isquemic heart diseases”, and RTA is “road traffic accidents”. Source: own calculations.

Figure 7: Cause-specific contributions to state differences from low mortality benchmark for female youngest population (ages 0-14), 1990-2015.



Note: AMS is “amenable to medical service”, IHD is “isquemic heart diseases”, and RTA is “road traffic accidents”. Source: own calculations.

Figure 8: Cause-specific contributions to state differences from low mortality benchmark for male young adults (ages 15-49), 1990-2015.

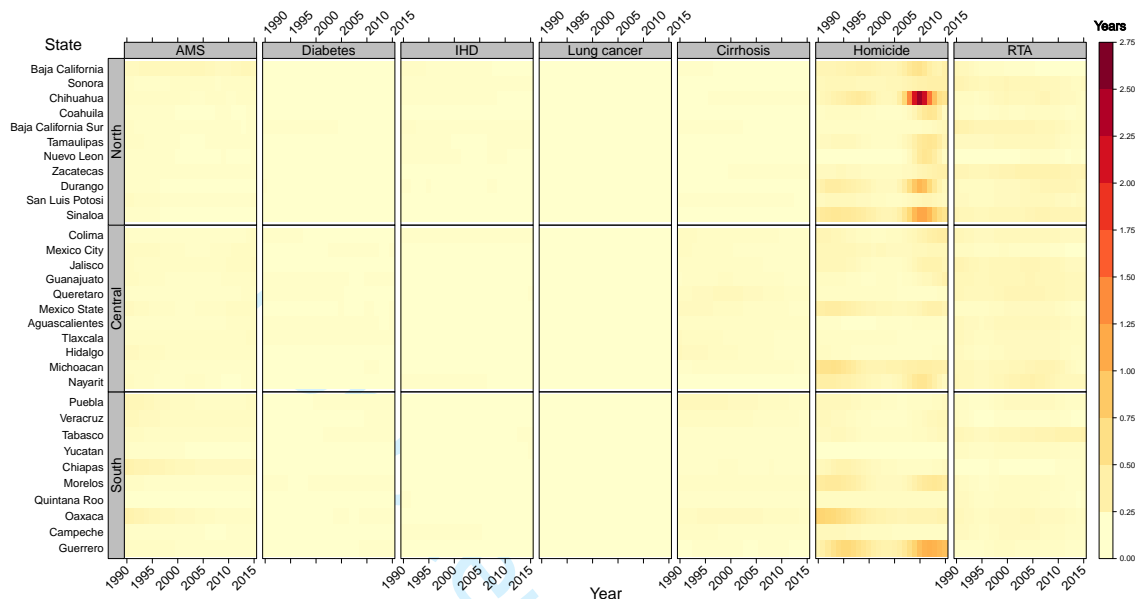

Note:

AMS is “amenable to medical service”, IHD is “ischemic heart diseases”, and RTA is “road traffic accidents”. Source: own calculations.

Figure 9: Cause-specific contributions to state differences from low mortality benchmark for female young adults (ages 15-49), 1990-2015.

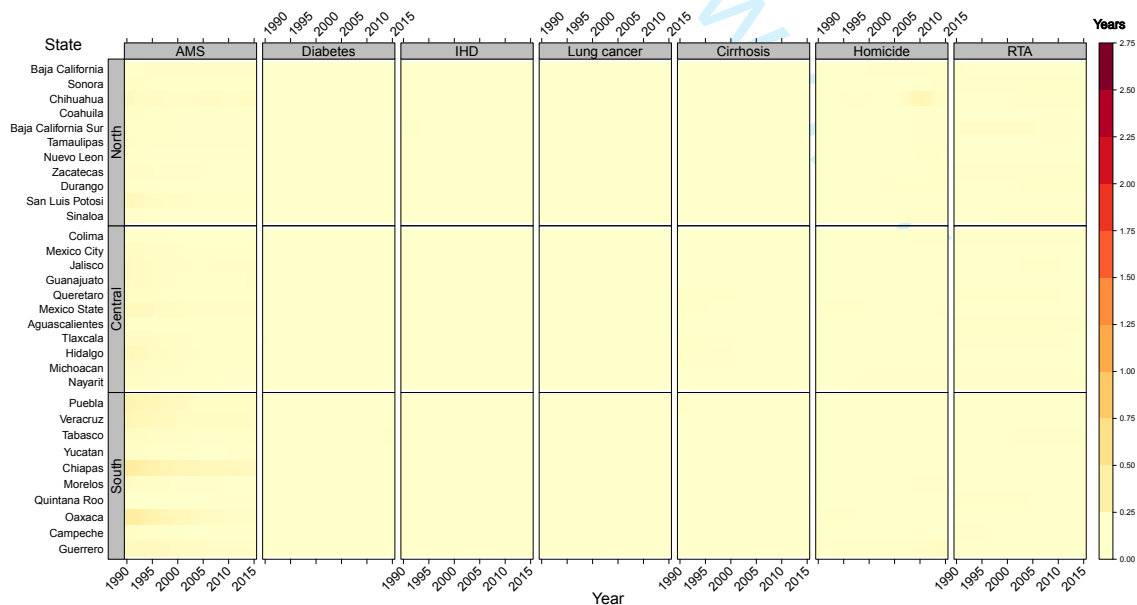

Note:

AMS is “amenable to medical service”, IHD is “ischemic heart diseases”, and RTA is “road traffic accidents”. Source: own calculations.



Figure 10: State specific gap with low mortality benchmark for selected years between ages 0-14. Source: own calculations.

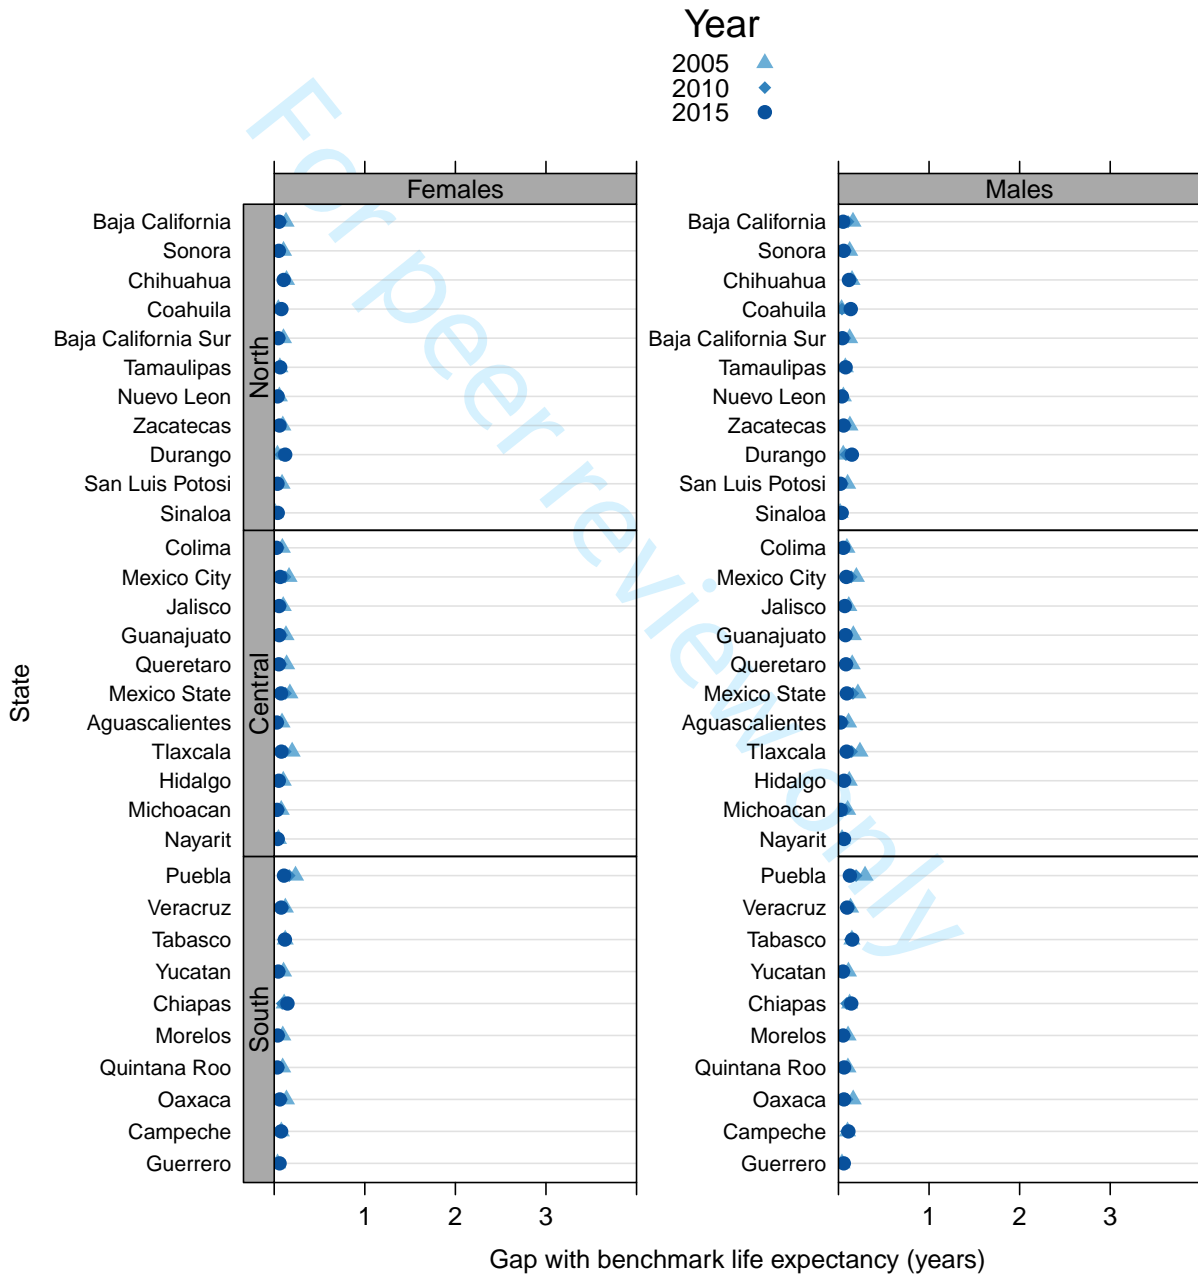

Figure 11: State specific gap with low mortality benchmark for selected years between ages 15-49. Source: own calculations.

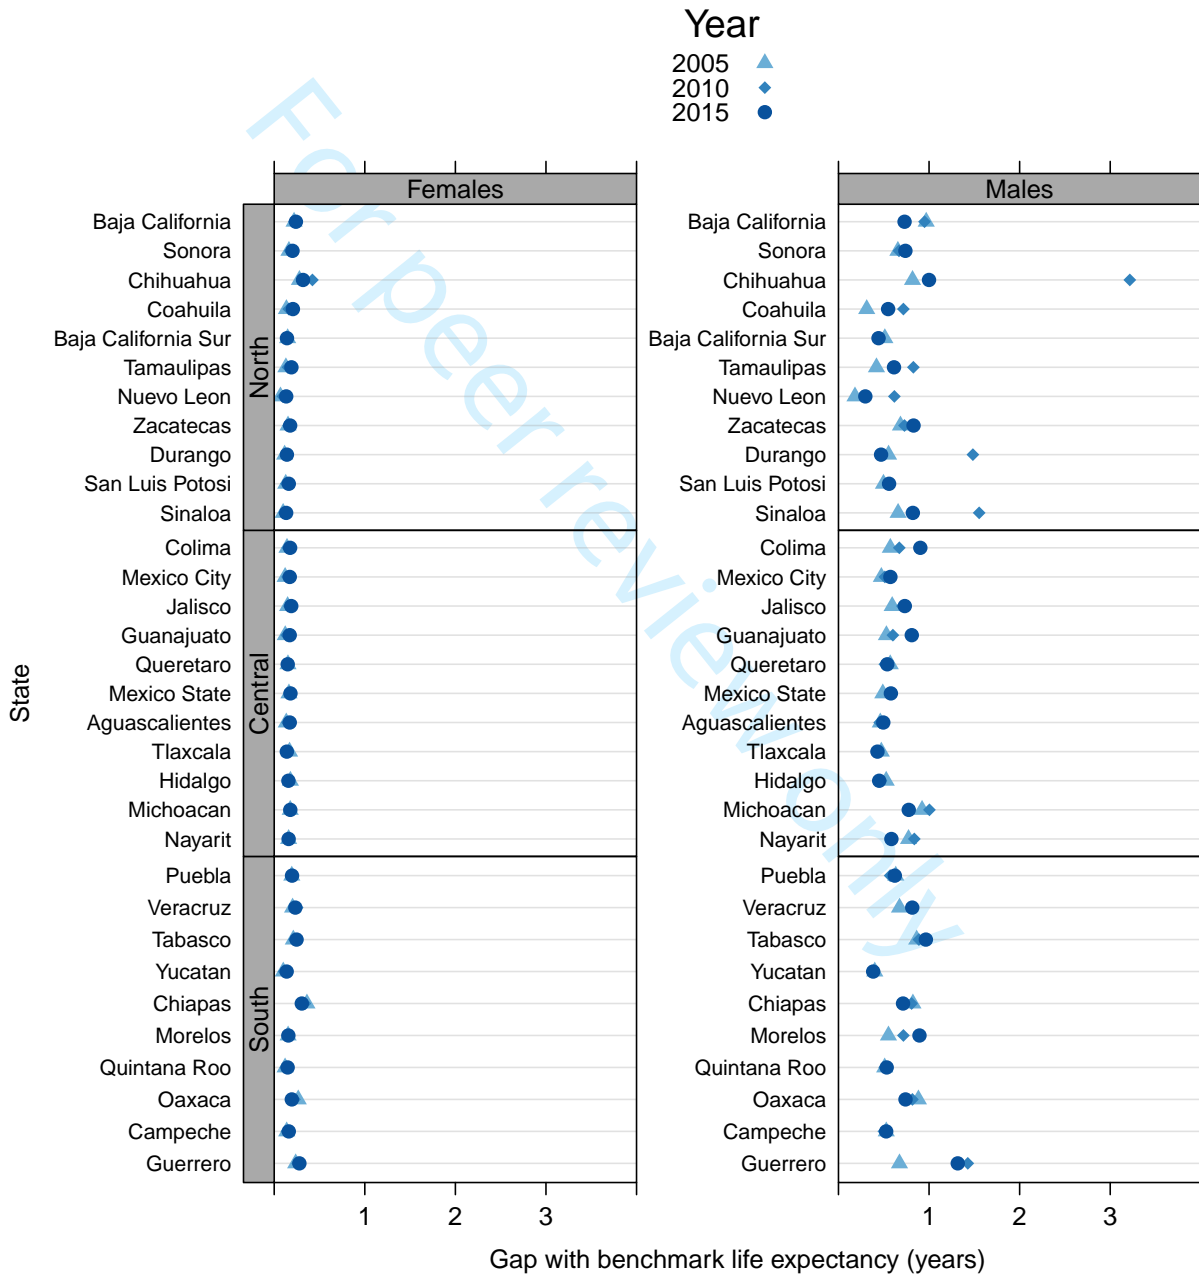

Figure 12: State specific gap with low mortality benchmark for selected years between ages 50-84. Source: own calculations.

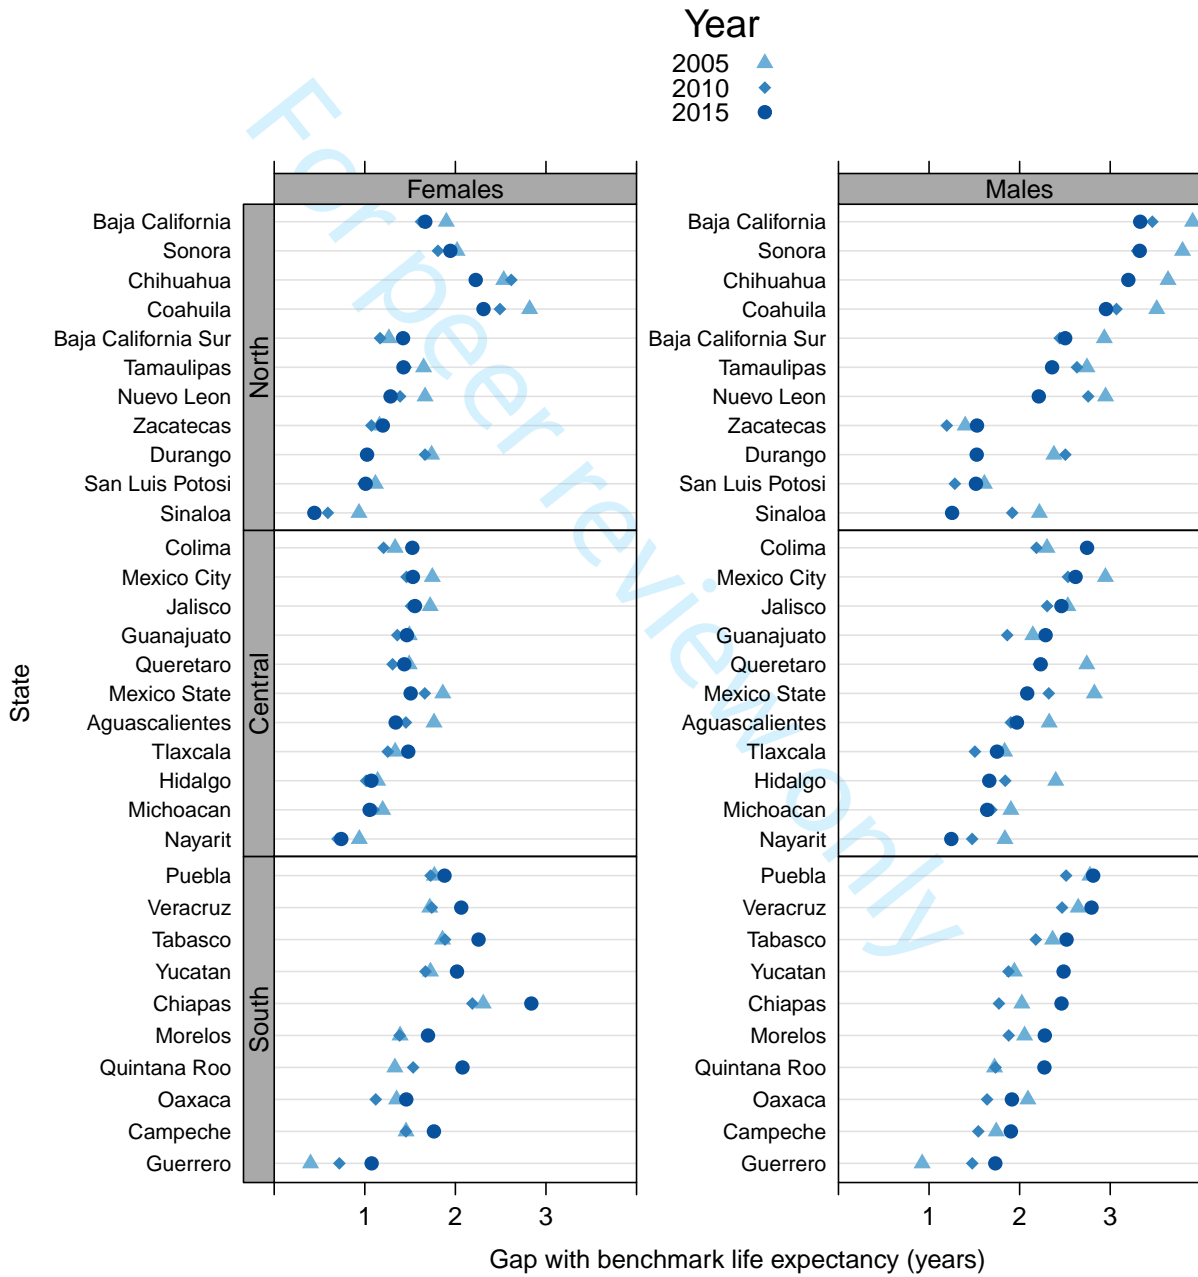

1  
2  
3  
4  
5  
6  
7  
8  
9  
10  
11  
12  
13  
14  
15  
16  
17  
18  
19  
20  
21  
22  
23  
24  
25  
26  
27  
28  
29  
30  
31  
32  
33  
34  
35  
36  
37  
38  
39  
40  
41  
42  
43  
44  
45  
46  
47  
48  
49  
50  
51  
52  
53  
54  
55  
56  
57  
58  
59  
60

Figure 13: Proportion by cause of death from benchmark mortality for youngest females (ages 0-14). Source: own calculations.

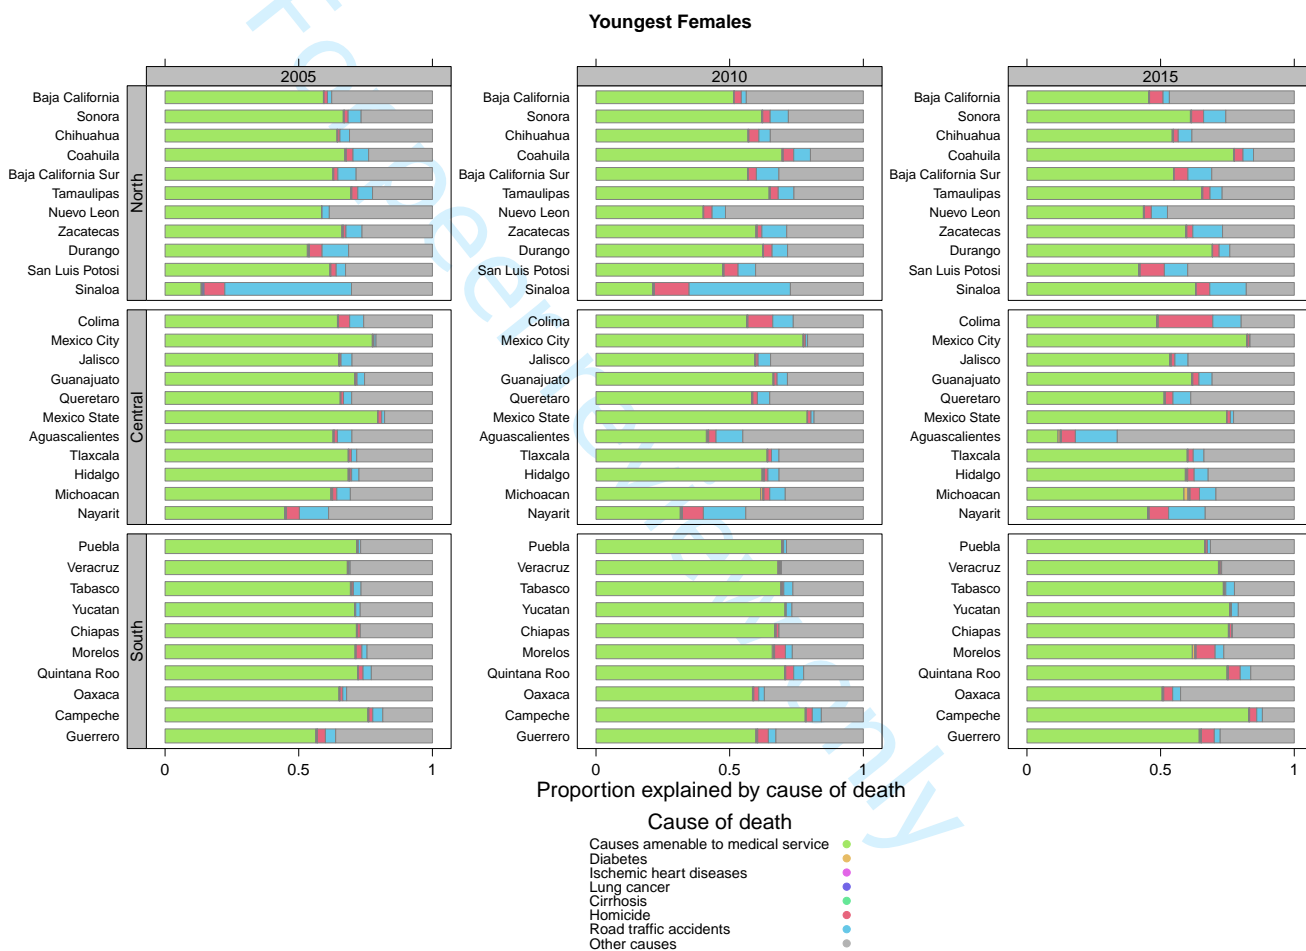

1  
2  
3  
4  
5  
6  
7  
8  
9  
10  
11  
12  
13  
14  
15  
16  
17  
18  
19  
20  
21  
22  
23  
24  
25  
26  
27  
28  
29  
30  
31  
32  
33  
34  
35  
36  
37  
38  
39  
40  
41  
42  
43  
44  
45  
46  
47  
48  
49  
50  
51  
52  
53  
54  
55  
56  
57  
58  
59  
60

Figure 14: Proportion by cause of death from benchmark mortality for youngest males (ages 0-14). Source: own calculations.



1  
2  
3  
4  
5  
6  
7  
8  
9  
10  
11  
12  
13  
14  
15  
16  
17  
18  
19  
20  
21  
22  
23  
24  
25  
26  
27  
28  
29  
30  
31  
32  
33  
34  
35  
36  
37  
38  
39  
40  
41  
42  
43  
44  
45  
46  
47  
48  
49  
50  
51  
52  
53  
54  
55  
56  
57  
58  
59  
60

Figure 15: Proportion by cause of death from benchmark mortality for young adult females (ages 15-49).  
Source: own calculations.

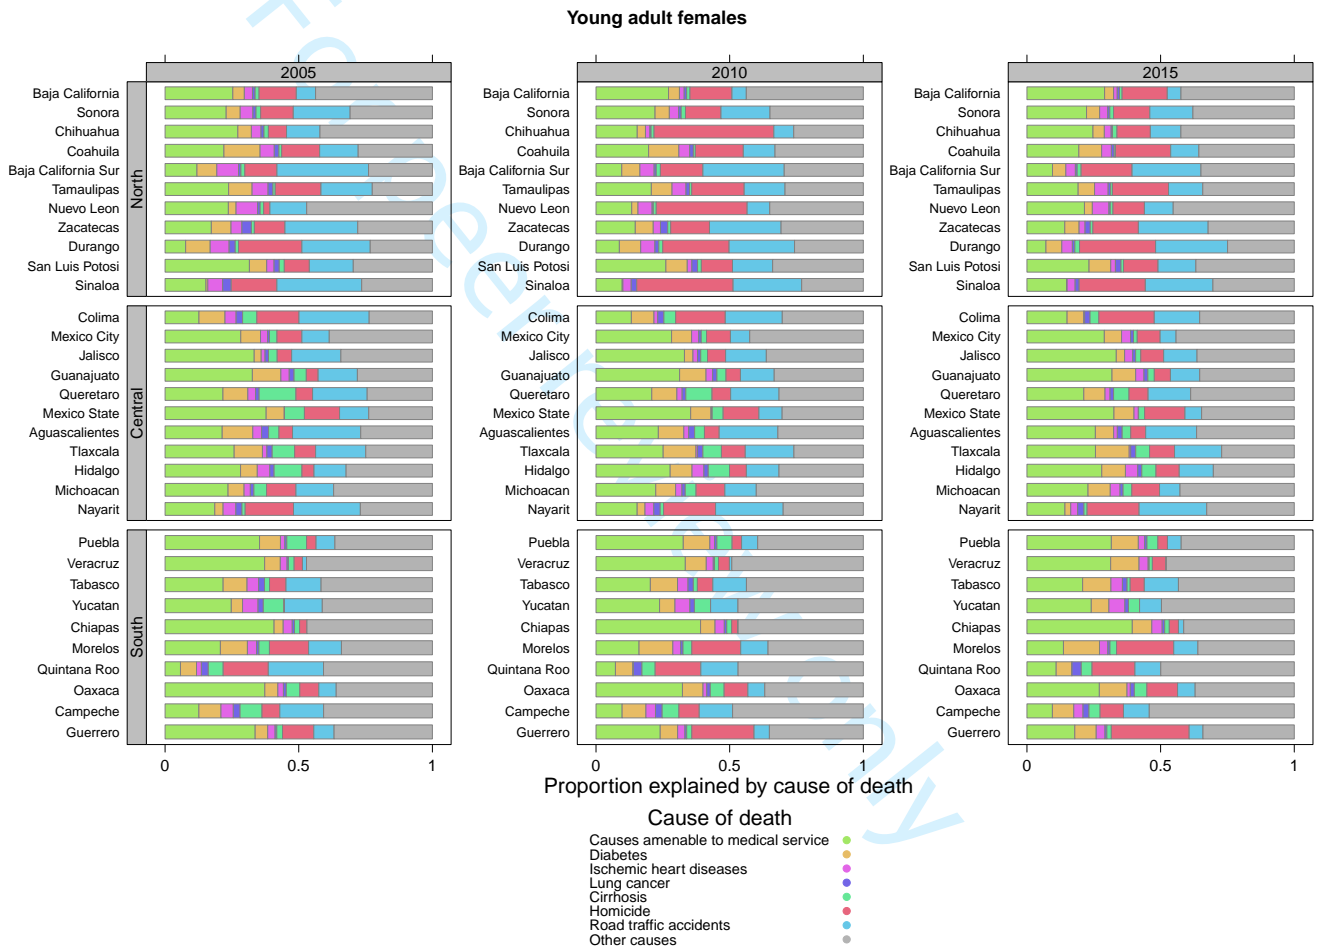

1  
2  
3  
4  
5  
6  
7  
8  
9  
10  
11  
12  
13  
14  
15  
16  
17  
18  
19  
20  
21  
22  
23  
24  
25  
26  
27  
28  
29  
30  
31  
32  
33  
34  
35  
36  
37  
38  
39  
40  
41  
42  
43  
44  
45  
46  
47  
48  
49  
50  
51  
52  
53  
54  
55  
56  
57  
58  
59  
60

Figure 16: Proportion by cause of death from benchmark mortality for young adult males (ages 15-49).  
Source: own calculations.

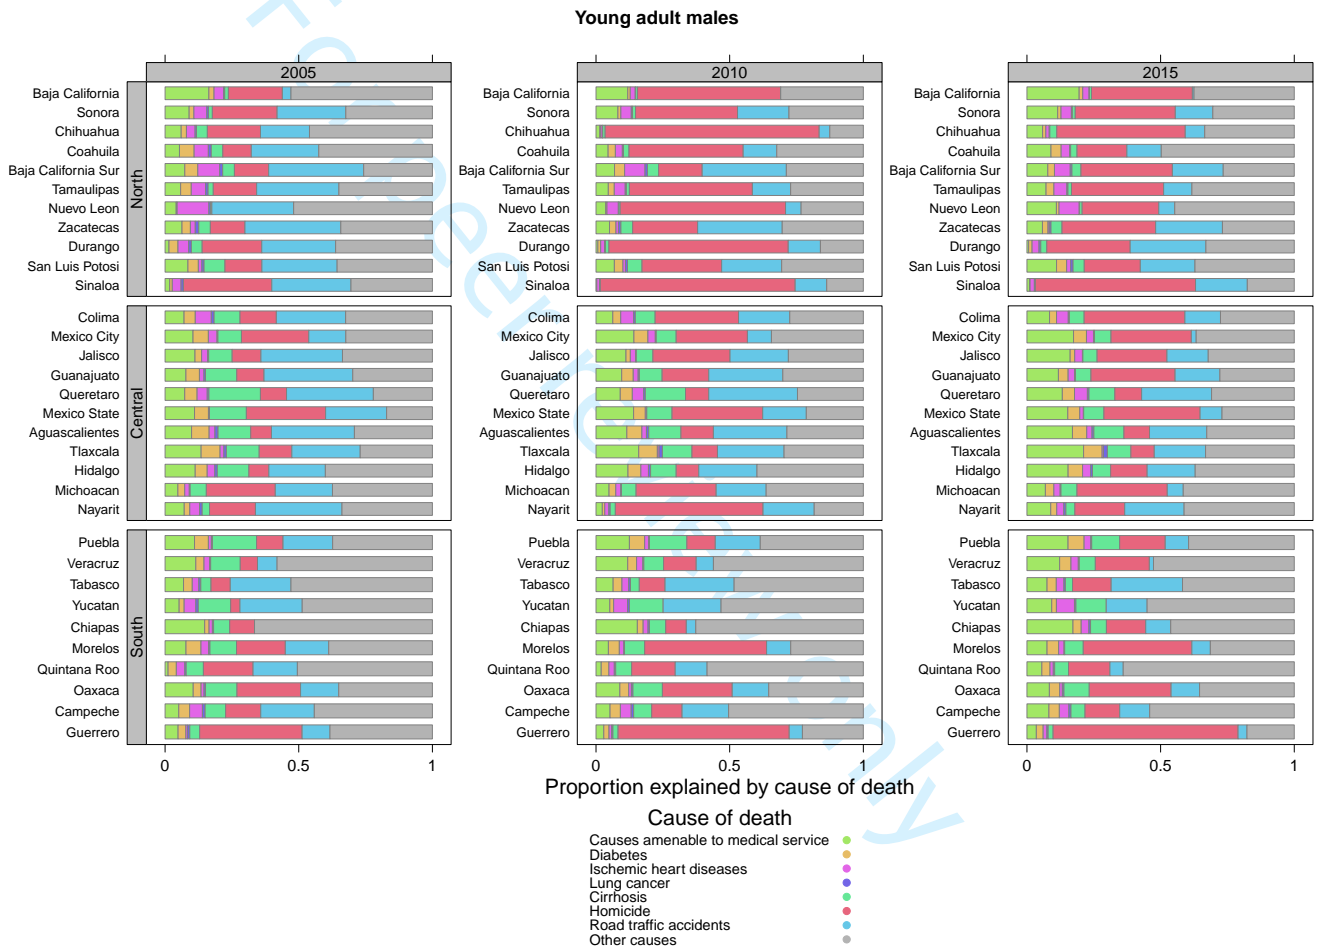

Figure 17: Proportion by cause of death from benchmark mortality for older male adults (ages 50-84). Source: own calculations.

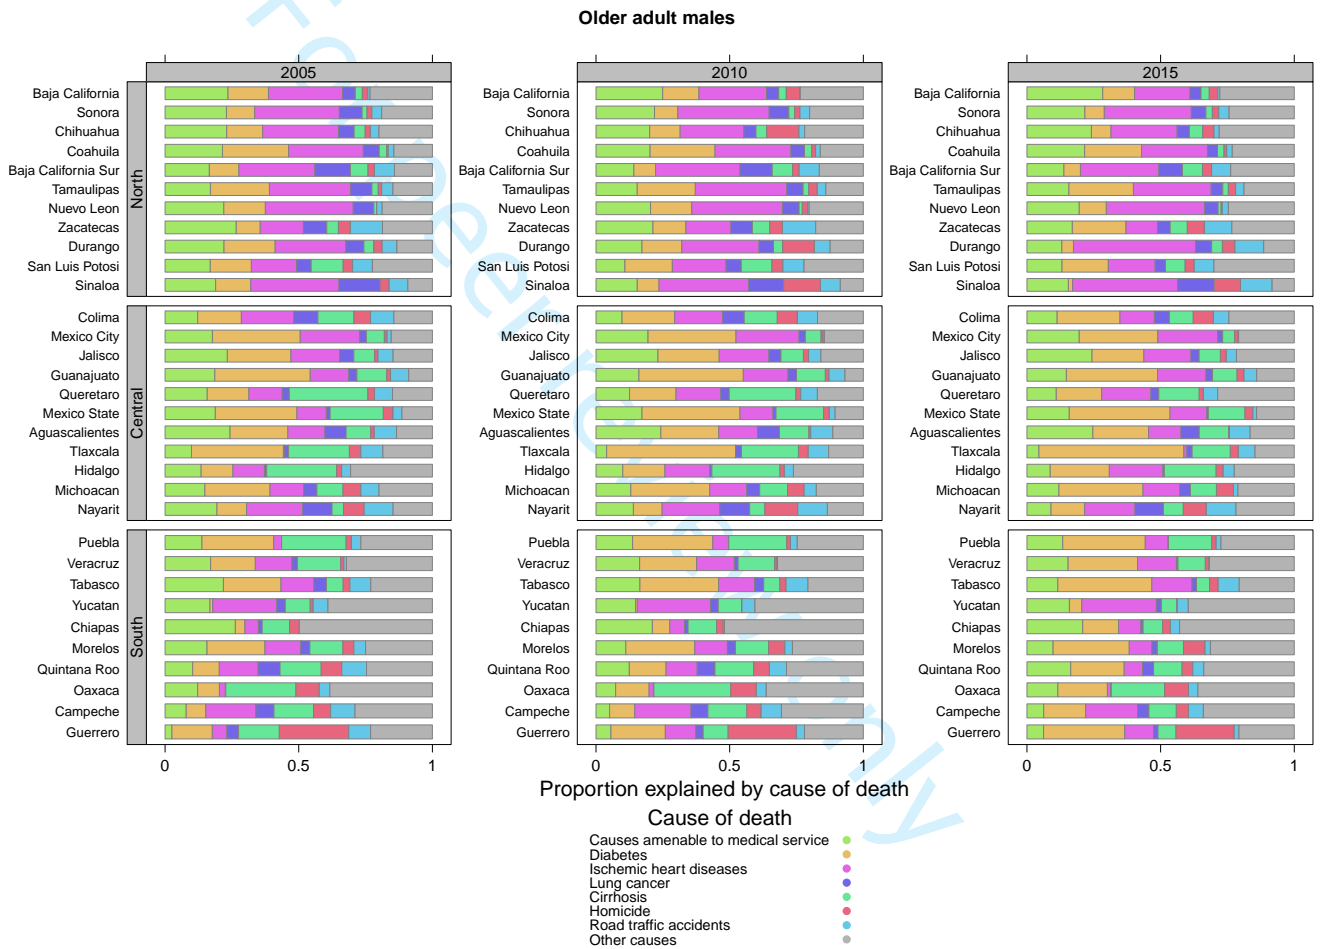



1  
2  
3  
4  
5  
6  
7  
8  
9  
10  
11  
12  
13  
14  
15  
16  
17  
18  
19  
20  
21  
22  
23  
24  
25  
26  
27  
28  
29  
30  
31  
32  
33  
34  
35  
36  
37  
38  
39  
40  
41  
42  
43  
44  
45  
46  
47  
48  
49  
50  
51  
52  
53  
54  
55  
56  
57  
58  
59  
60

Figure 18: Proportion by cause of death from benchmark mortality for older female adults (ages 50-84). Source: own calculations.

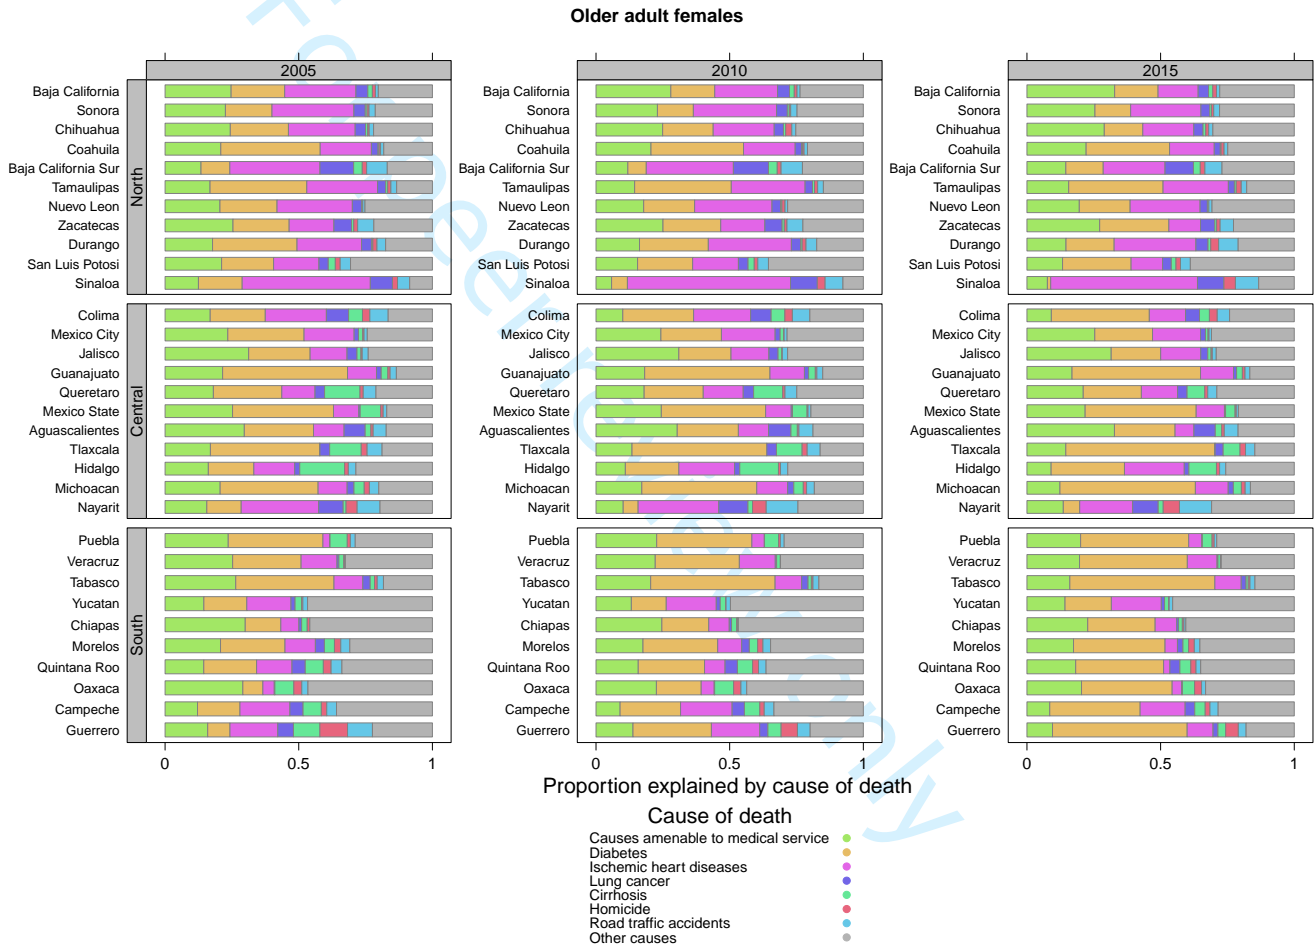

STROBE Statement—Checklist of items that should be included in reports of *cross-sectional studies*

|                              | Item No | Recommendation                                                                                                                                                                                                                                                                                                                                                                                                  |
|------------------------------|---------|-----------------------------------------------------------------------------------------------------------------------------------------------------------------------------------------------------------------------------------------------------------------------------------------------------------------------------------------------------------------------------------------------------------------|
| <b>Title and abstract</b>    | 1       | (a) Indicate the study's design with a commonly used term in the title or the abstract <b>(done)</b><br>(b) Provide in the abstract an informative and balanced summary of what was done and what was found <b>(done)</b>                                                                                                                                                                                       |
| <b>Introduction</b>          |         |                                                                                                                                                                                                                                                                                                                                                                                                                 |
| Background/rationale         | 2       | Explain the scientific background and rationale for the investigation being reported <b>(done)</b>                                                                                                                                                                                                                                                                                                              |
| Objectives                   | 3       | State specific objectives, including any prespecified hypotheses <b>(done)</b>                                                                                                                                                                                                                                                                                                                                  |
| <b>Methods</b>               |         |                                                                                                                                                                                                                                                                                                                                                                                                                 |
| Study design                 | 4       | Present key elements of study design early in the paper <b>(done)</b>                                                                                                                                                                                                                                                                                                                                           |
| Setting                      | 5       | Describe the setting, locations, and relevant dates, including periods of recruitment, exposure, follow-up, and data collection <b>(done)</b>                                                                                                                                                                                                                                                                   |
| Participants                 | 6       | (a) Give the eligibility criteria, and the sources and methods of selection of participants <b>(done)</b>                                                                                                                                                                                                                                                                                                       |
| Variables                    | 7       | Clearly define all outcomes, exposures, predictors, potential confounders, and effect modifiers. Give diagnostic criteria, if applicable <b>(done)</b>                                                                                                                                                                                                                                                          |
| Data sources/<br>measurement | 8*      | For each variable of interest, give sources of data and details of methods of assessment (measurement). Describe comparability of assessment methods if there is more than one group <b>(done)</b>                                                                                                                                                                                                              |
| Bias                         | 9       | Describe any efforts to address potential sources of bias <b>(done)</b>                                                                                                                                                                                                                                                                                                                                         |
| Study size                   | 10      | Explain how the study size was arrived at <b>(done)</b>                                                                                                                                                                                                                                                                                                                                                         |
| Quantitative variables       | 11      | Explain how quantitative variables were handled in the analyses. If applicable, describe which groupings were chosen and why <b>(done)</b>                                                                                                                                                                                                                                                                      |
| Statistical methods          | 12      | (a) Describe all statistical methods, including those used to control for confounding <b>(done)</b><br>(b) Describe any methods used to examine subgroups and interactions <b>(done)</b><br>(c) Explain how missing data were addressed (Not applicable [NA])<br>(d) If applicable, describe analytical methods taking account of sampling strategy (NA)<br>(e) Describe any sensitivity analyses <b>(done)</b> |
| <b>Results</b>               |         |                                                                                                                                                                                                                                                                                                                                                                                                                 |
| Participants                 | 13*     | (a) Report numbers of individuals at each stage of study—eg numbers potentially eligible, examined for eligibility, confirmed eligible, included in the study, completing follow-up, and analysed ( <b>Target population defined</b> )<br>(b) Give reasons for non-participation at each stage<br>(c) Consider use of a flow diagram                                                                            |
| Descriptive data             | 14*     | (a) Give characteristics of study participants (eg demographic, clinical, social) and information on exposures and potential confounders <b>(done)</b><br>(b) Indicate number of participants with missing data for each variable of interest <b>(NA)</b>                                                                                                                                                       |
| Outcome data                 | 15*     | Report numbers of outcome events or summary measures <b>(done)</b>                                                                                                                                                                                                                                                                                                                                              |
| Main results                 | 16      | (a) Give unadjusted estimates and, if applicable, confounder-adjusted estimates and their precision (eg, 95% confidence interval). Make clear which confounders were adjusted for and why they were included <b>(done)</b>                                                                                                                                                                                      |

|                          |    |                                                                                                                                                                                          |
|--------------------------|----|------------------------------------------------------------------------------------------------------------------------------------------------------------------------------------------|
|                          |    | (b) Report category boundaries when continuous variables were categorized <b>(NA)</b>                                                                                                    |
|                          |    | (c) If relevant, consider translating estimates of relative risk into absolute risk for a meaningful time period <b>(NA)</b>                                                             |
| Other analyses           | 17 | Report other analyses done—eg analyses of subgroups and interactions, and sensitivity analyses <b>(done)</b>                                                                             |
| <b>Discussion</b>        |    |                                                                                                                                                                                          |
| Key results              | 18 | Summarise key results with reference to study objectives <b>(done)</b>                                                                                                                   |
| Limitations              | 19 | Discuss limitations of the study, taking into account sources of potential bias or imprecision. Discuss both direction and magnitude of any potential bias <b>(done)</b>                 |
| Interpretation           | 20 | Give a cautious overall interpretation of results considering objectives, limitations, multiplicity of analyses, results from similar studies, and other relevant evidence <b>(done)</b> |
| Generalisability         | 21 | Discuss the generalisability (external validity) of the study results <b>(done)</b>                                                                                                      |
| <b>Other information</b> |    |                                                                                                                                                                                          |
| Funding                  | 22 | Give the source of funding and the role of the funders for the present study and, if applicable, for the original study on which the present article is based <b>(NA)</b>                |

\*Give information separately for exposed and unexposed groups.

**Note:** An Explanation and Elaboration article discusses each checklist item and gives methodological background and published examples of transparent reporting. The STROBE checklist is best used in conjunction with this article (freely available on the Web sites of PLoS Medicine at <http://www.plosmedicine.org/>, Annals of Internal Medicine at <http://www.annals.org/>, and Epidemiology at <http://www.epidem.com/>). Information on the STROBE Initiative is available at [www.strobe-statement.org](http://www.strobe-statement.org).

# BMJ Open

## Trends in avoidable mortality over the life course in Mexico, 1990-2015: A cross-sectional demographic analysis

|                                 |                                                                                                                                                                                                                                                                                                                                                                              |
|---------------------------------|------------------------------------------------------------------------------------------------------------------------------------------------------------------------------------------------------------------------------------------------------------------------------------------------------------------------------------------------------------------------------|
| Journal:                        | <i>BMJ Open</i>                                                                                                                                                                                                                                                                                                                                                              |
| Manuscript ID                   | bmjopen-2018-022350.R2                                                                                                                                                                                                                                                                                                                                                       |
| Article Type:                   | Research                                                                                                                                                                                                                                                                                                                                                                     |
| Date Submitted by the Author:   | 06-Jul-2018                                                                                                                                                                                                                                                                                                                                                                  |
| Complete List of Authors:       | Aburto, José Manuel; Syddansk Universitet Det Sundhedsvidenskabelige Fakultet, Biodemography Unit, Department of Public Health; Max-Planck-Institut für Demografische Forschung, Lifespan Inequalities Research group Riffe, Tim; Max-Planck-Institut für Demografische Forschung Canudas-Romo, Vladimir; Australian National University College of Arts and Social Sciences |
| <b>Primary Subject Heading</b>: | Public health                                                                                                                                                                                                                                                                                                                                                                |
| Secondary Subject Heading:      | Epidemiology, Global health, Health policy                                                                                                                                                                                                                                                                                                                                   |
| Keywords:                       | health inequality, adult health, homicides, avoidable mortality, health behaviours                                                                                                                                                                                                                                                                                           |
|                                 |                                                                                                                                                                                                                                                                                                                                                                              |

SCHOLARONE™  
Manuscripts

1  
2  
3 **Title: Trends in avoidable mortality over the life course in Mexico, 1990-2015: A cross-**  
4 **sectional demographic analysis**  
5

6  
7 **Authors:** José Manuel Aburto, *PhD student (JMA)*<sup>a,b\*†</sup>, Tim Riffe, *Research Scientist (TR)*<sup>b†</sup> & Vla-  
8 dimir Canudas-Romo, *Associate Professor (VCR)*<sup>c</sup>

9 **Author affiliations:**

10 <sup>a</sup> Center on Population Dynamics (CPop), University of Southern Denmark, Odense 5000, Den-  
11 mark.

12 <sup>b</sup> Max Planck Institute for Demographic Research, Rostock 18057, Germany

13 <sup>c</sup> School of Demography, Australian National University, ACT 0200, Australia

14 <sup>†</sup> These authors contributed equally to the paper

15 <sup>\*</sup> The manuscript's guarantor.  
16  
17

18  
19 **Corresponding author:** José Manuel Aburto: [jmaburto@health.sdu.dk](mailto:jmaburto@health.sdu.dk), T: +45 65509416  
20

21 *The Corresponding Author has the right to grant on behalf of all authors and does grant on be-*  
22 *half of all authors, an exclusive licence (or non exclusive for government employees) on a world-*  
23 *wide basis to the BMJ Publishing Group Ltd to permit this article (if accepted) to be published in*  
24 *BMJ editions and any other BMJ PGL products and sublicences such use and exploit all subsidiary*  
25 *rights, as set out in our licence.*  
26  
27  
28  
29  
30  
31  
32  
33  
34  
35  
36  
37  
38  
39  
40  
41  
42  
43  
44  
45  
46  
47  
48  
49  
50  
51  
52  
53  
54  
55  
56  
57  
58  
59  
60

**Keywords** health inequalities, adult health, amenable mortality, violence, homicides

### Abstract

**Objective:** To analyse average lifespan and quantify the effect of Avoidable/Amenable mortality on the difference between state-specific mortality and a low-mortality benchmark in Mexico during 1990-2015.

**Design:** Retrospective cross-sectional demographic analysis using aggregated data.

**Setting:** Vital statistics from the Mexican civil registration system.

**Participants:** Aggregated national data (from 91.2 million people in 1995 to 119.9 in 2015) grouped in 64 populations (32 Mexican-states [including Mexico City] by sex) with cause-of-death data.

**Main outcome measures:** Cause-specific contributions to the gap in life expectancy with a low-mortality benchmark in three age groups (0-14, 15-49 and 50-84).

**Results:** Infants and children under age 15 show improvements towards maximal survival in all states. However, adult males aged 15 to 49 show deterioration after 2006 in almost every state due to increasing homicides, and a slow recovery thereafter. Out of 35 potential years, females and males live on average 34.57 (34.48 to 34.67) and 33.80 (33.34 to 34.27), respectively. Adults aged 50 to 84 show an unexpected decrease in the low mortality benchmark, indicating nationwide deterioration among older adults. Females and males in this age group show an average survival of 28.59 (27.43 to 29.75) and 26.52 (25.33 to 27.73) out of 35 potential years, respectively. State gaps from the benchmark were mainly caused by ischemic heart diseases, diabetes, cirrhosis and homicides. We find large health disparities between states, particularly for the adult population after 2005.

**Conclusions:** Mexico has succeeded in reducing mortality and between-state inequalities in children. However, adults are becoming vulnerable as they have not been able to reduce the burden of violence and conditions amenable to health services and behaviours, such as diabetes, ischemic heart diseases and cirrhosis. These trends have led to large health disparities between Mexican states in the last 25 years.

### Strengths and limitations of this study

- We analyse nine cause-of-death groups using the concept of avoidable/amenable mortality, which enables us to capture recent changes in mortality in Mexico.
- We introduce a methodology to quantify the impact of medically amenable mortality and behavior related conditions on life expectancy relative to a low mortality benchmark.
- We analyze patterns in life expectancy for different age groups over time (1995-2015) and simultaneously account for changes in causes of death and inequality between states that have undergone major social and public health transitions.
- Mortality data from Mexico are likely to present inaccuracies in cause-of-death classification due to comorbidities, particularly at older ages.
- Our estimates of homicide mortality are likely to be underestimated due to inaccurate practices in counting and reporting, and due to the large number of missing individuals in Mexico

### Introduction

The second half of the 20th century was marked by sizable improvements in mortality, living conditions, and health in most Latin American countries.<sup>1</sup> In Mexico, these improvements have slowed down recently due to opposing trends in particular causes of death. For instance, homicide and diabetes increased during the first decade of the 2000's, even as infectious and respiratory diseases continued to fall over the same period. While life expectancy at birth increased by 4.3 years for males (from 67.6 to 71.9) and 3.4 years for females (from 73.8 to 77.2) between 1990 and 2000,<sup>2</sup> between 2000 and 2010, life expectancy at birth entered into a period of stagnation for males and slowed progress for females.<sup>3</sup>

This period coincides with ongoing public health interventions, such as the Universal Vaccination Program and established health systems (IMSS, ISSSTE), and with the implementation of a Universal Health Coverage program (*Seguro Popular*). The latter program provides primary and secondary health care to the uninsured population and distributes funds to cover catastrophic health expenditures.<sup>4</sup> Further, since 1997 conditional cash transfer programs were introduced to supply incentives for poor families to invest in education, health, and nutrition.<sup>5</sup> Some evidence suggests that Mexico experienced substantial decreases in infant and child mortality, and in the prevalence of acute malnutrition between 1980 and 2000 thanks in part to these interventions.<sup>6</sup> Similarly, by 2012 *Seguro Popular* had provided health insurance coverage to an additional 52 million people in Mexico (or 44.4% of the population), leading to increased access to public health care and protection from the financial consequences of disease.<sup>7</sup>

1  
2  
3 Conditional cash transfers have focused on the poorest states, and *Seguro Popular* was intro-  
4 duced at different times in different states across the country. Although these actions under-  
5 score broad progress in public health interventions, they mask disparities between Mexican  
6 states and epidemiological patterns that differ between age groups. For instance, Mexico faces  
7 a rapid aging process in which an interaction between infectious diseases and noncommunica-  
8 ble conditions can be anticipated in the adult population.<sup>8</sup> Therefore, it is necessary to assess  
9 the varied impacts that these interventions may have had on mortality in Mexican states at dif-  
10 ferent ages.<sup>9</sup>

11  
12  
13  
14 One approach to approximate the impact of health care and other interventions on survival, and  
15 to reveal potential areas of improvement is by operationalizing the concept of Avoidable or  
16 Amenable Mortality (hereafter abbreviated AM).<sup>10-11</sup> This categorization of mortality aims to  
17 measure the quality of health service systems by selecting certain causes of death that should  
18 not occur in the presence of effective and timely health care. Therefore, improvements in AM  
19 mortality are expected over time, as has been observed in several countries. For example,  
20 among 19 industrialized countries, including 14 countries from Western Europe, USA, Canada,  
21 Australia, New Zealand and Japan, a reduction in AM rates was observed over the past 20  
22 years.<sup>10</sup> Avoidable mortality rates fell, on average, by 17% for males and 14% for females in the-  
23 se countries between 1997 and 2003. The USA lagged behind the other countries in this group,  
24 while Japan, France, and Australia were the top performers. Despite mortality reductions from  
25 cancers and circulatory diseases for both sexes, disparities between countries persist, with the  
26 United States showing the smallest reductions (around 5%) for both sexes.<sup>10</sup>

27  
28  
29  
30  
31 In Mexico, the components of avoidable mortality have undergone opposing trends since the  
32 late 1990's. Mortality from infectious diseases and nutrition-related conditions decreased be-  
33 tween 2000 and 2004,<sup>12</sup> while deaths related to diabetes and ischemic heart diseases increased  
34 in the first decade of the 2000s.<sup>13</sup> Importantly, increases in the latter causes of death were con-  
35 centrated in the poorest states of the country.<sup>13</sup>

36  
37  
38 The objective of this research is twofold. First, we analyse trends in average lifespan for all 32  
39 Mexican states, by sex, and over the full period from 1990 to 2015. This extends previous stud-  
40 ies that focused on the 21st century.<sup>3, 13-16</sup> Our study period covers several public health inter-  
41 ventions and captures several major trends in state and cause-of-death variation. Second, we  
42 further segment AM into health intervention-related and behaviour-related AM causes that  
43 best characterise the epidemiological patterns of Mexico.<sup>14</sup> This lets us quantify the effect of the  
44 components of AM on the difference between state mortality levels and an easy-to-understand  
45 low-mortality benchmark calculated for large age groups (i.e. 0-14, 15-49 and 50-84). This  
46 benchmark concept has been previously used in mortality studies.<sup>17-19</sup> Deviations from the low-  
47 mortality benchmark indicate a strong potential for improvement.

48  
49  
50  
51  
52 We hypothesize age-dependent variations in mortality outcomes. In particular, since public  
53 health interventions are mainly focused on infant and child health, we expect convergence be-  
54 tween states and improvement in survival for infants and children aged 0 to 15. For instance,  
55 the vaccination program and *Seguro Popular* aim to cover all children, and recent evidence sug-  
56



gests a decrease in mortality below age 15 due to a decline in infectious and respiratory diseases.<sup>20</sup> On the contrary, we expect little improvement in survival for the young-adult population (ages 15 to 35) due to the sudden and egregious rise in homicide mortality.<sup>21</sup> We foresee health deterioration among older adults due to documented increases in diabetes mortality.<sup>20</sup> Although every state has the commitment to provide universal coverage and equitable access to health care, we anticipate disparities in mortality improvements between states due to heterogeneous epidemiological transitions among states,<sup>16</sup> and differences in the implementation and delivery of health care programs.<sup>22</sup>

## Data sources & methods

Our analyses are based on publicly available anonymized datasets. We used 100% sample death register microdata files produced by the Mexican Statistical Office (INEGI) for years 1990 to 2015.<sup>23</sup> We aggregated individual deaths from these annual files by causes of death, single year of age, sex, and state of residence at the time of death. Population estimates from 1990 to 2015 were produced by the Mexican Population Council (CONAPO).<sup>24</sup> These population estimates adjust for age misstatement, undercounting, and interstate and international migration. Death counts and estimates of the population exposed to risk were used to calculate age and cause specific death rates by sex for each state from 1990 to 2015.

### *Classification of Causes of Death*

To classify deaths we use the concept of “Avoidable/Amenable” Mortality (AM).<sup>10 11</sup> We group causes of death into nine categories based on recent classification adapted to the case of Mexico.<sup>14</sup> The first category refers to those conditions that are susceptible to medical intervention, such as infectious and respiratory diseases, some cancers and circulatory conditions, and birth conditions, among others. We label this category as “Causes amenable to medical service”. We separate diabetes, ischemic heart diseases (IHD), lung cancer, and cirrhosis as subcategories of AM because these causes are susceptible to both health behaviour and medical service, and because the first two represent major causes of death among Mexican adults.<sup>16</sup> We also separate homicide, suicide and road traffic accidents because they have emerged as leading causes of death among young people, and the first one recently had a sizable impact on life expectancy in Mexico.<sup>14</sup> We grouped remaining causes into a single category labelled “Other causes”.

Death data were originally classified according to the International Classification of Diseases (ICD), revision 9 for years 1990 to 1997 and revision 10 for 1998 to 2015 (see Additional file 1 Table 1 for details on ICD codes for each category). To check the validity of these cause-of-death codes in Mexico, we performed a sensitivity analysis and did not find major ruptures in mortality trends by AM classification (See Additional file 1, Figure 1).

Comorbidity in the old age population has increased in Mexico.<sup>25</sup> As a result inaccuracies may arise in cause of death registration due to problems associated with medical diagnosis, and selection and coding of the leading cause of death. Although analyses older ages should consider multiple causes of death to better represent old age mortality, we focus on the primary cause of

1  
2  
3 death. We truncate our analysis at age 85 to avoid misinterpreting results related to inaccurate  
4 cause-of-death coding practices.  
5  
6  
7

### 8 *Age groups*

9 We calculate life expectancy in three large age groups to capture mortality differences over the  
10 life course. Life expectancy in each age group refers to the average years of life lived between  
11 two ages conditional on survival to the lower age bound. This measure is also known in demo-  
12 graphic analysis as temporary life expectancy.<sup>26</sup> The first age group contains infants and children  
13 aged 0-14. This group is likely to represent improvements in causes amenable to medical service  
14 (e.g. infectious diseases and conditions of the perinatal period).<sup>3</sup> The second group, aged 15-49,  
15 is used to capture the effect of homicide mortality and external causes historically related to the  
16 young-adult mortality hump, as well as maternal mortality for women.<sup>27</sup> This age group had an  
17 important impact on changes in state life expectancy in the first decade of the 2000s.<sup>14</sup> The  
18 third group covers older adults aged 50-84. Older adults are likely to represent a vulnerable  
19 group due to increases in non-communicable diseases and injury-related mortality in recent  
20 years.<sup>16 28</sup>  
21  
22  
23  
24

### 25 *Low mortality benchmark*

26 Our low-mortality benchmark is calculated on the basis of the lowest observed mortality rates  
27 over all states by age, year, cause, and sex. The resulting minimum mortality rate schedule has a  
28 unique age profile, and it determines our benchmark temporary life expectancy, which we cal-  
29 culate for our three age groups. This benchmark is a practical reference because it is based nei-  
30 ther on a projection of improvements into the future nor on an arbitrary and likely dissimilar  
31 population. It can be treated as the best presently achievable mortality assuming perfect diffu-  
32 sion of the best available practices and technologies in Mexico.<sup>19</sup>  
33  
34  
35

### 36 *Methods*

37 Cause-specific death rates underlie all indices reported in this work. To mitigate the impact of  
38 random variations over time and to correct for age-heaping, we adjust these rates in two steps.  
39 First, we smooth cause-specific rates over age and time for each state and sex separately using a  
40 2-d p-spline.<sup>29</sup> Second, we rescale the smoothed cause-specific death rates to sum to the raw  
41 all-cause death rates for each sex and state. Period life tables up to age 84 for males and fe-  
42 males from 1990 to 2015 and their benchmarks were calculated following standard demograph-  
43 ic methods (for life table construction see Chapter 2 of reference 32).<sup>30 31</sup> We calculated tempo-  
44 rary life expectancies<sup>26</sup> (see Additional file 1 for a technical overview and 95% CIs) and estimat-  
45 ed cause-specific contributions to the difference between each state and the low mortality  
46 benchmark using standard decomposition techniques.<sup>32</sup> The decomposition method used in this  
47 analysis is based on a model of demographic functions that change gradually over time.<sup>32</sup> It is a  
48 stepwise-based demographic method and has been successfully used to decompose age and  
49 cause-specific effects on life expectancy.<sup>33</sup> We provide a short description in the Supplemental  
50 Material and the results are fully reproducible from the R-code provided in the Data Sharing  
51 statement. Finally, to measure the level of disparity between states over time, we calculated the  
52 coefficient of variation of the gap between temporary life expectancy and the low mortality  
53  
54  
55  
56  
57  
58  
59  
60

1  
2  
3 benchmark in each age group. This indicator is comparable over time and over age groups of  
4 different width. We also performed two-way ANOVA and post hoc tests to analyse disparities in  
5 temporary life expectancy between Mexican states and age groups.  
6

## 7 8 **Patient involvement** 9

10 No patients were involved in setting the research question, outcome measures, or design of the  
11 study. No patients were asked to advise on the interpretation of the results and there are no  
12 plans on disseminating the results of this research to study participants or the relevant patient  
13 community.  
14  
15

## 16 17 **Results** 18

### 19 20 *Trends in life expectancy for Mexican states by age-groups*

21 Figure 1 presents temporary life expectancy by state for infants and children (ages 0-14), young  
22 adults (15-49) and older adults (50-84) over the period 1990-2015. Grey lines refer to each of  
23 the 32 states, black lines represent the state average, and the blue lines represent the low mor-  
24 tality benchmark. The black line at the top of each panel indicates the maximum liveable years  
25 in each age group: 15 for the youngest group, and 35 for young and older adults conditional on  
26 surviving to ages 15 and 50, respectively. Any gap between a state line and the blue line repre-  
27 sents potential life expectancy gains if mortality were to drop to the low mortality benchmark.  
28  
29

30  
31 All states show improvements in the youngest age group since 1990, approaching the low mor-  
32 tality benchmark, which itself is very close to maximum survival below age 15. This was ob-  
33 served even in the southern states such as Puebla, Chiapas and Tabasco which have lagged in  
34 reducing mortality in this age group throughout the entire period.  
35  
36

37 Male life expectancy between ages 15 and 49 showed a sudden drop after 2005 in almost every  
38 state in Mexico. In 2005, young males in this age group had a temporary life expectancy of 33.9  
39 years (95% CI, 33.5 to 34.2) averaged over states. By 2010, the number of states below this level  
40 had increased from 14 to 23. Chihuahua, Sinaloa and Durango, in the northern region, experi-  
41 enced a substantial mortality shock in 2010 in this age group, and consequently recorded the  
42 largest gap from the low mortality benchmark. By 2015 the state average (33.8 years, 33.3 to  
43 34.3) had almost recovered to its 2005 level. Trends for females are closer to the low mortality  
44 benchmark.  
45  
46

47  
48 Among older adults, life expectancy between ages 50 and 84 shows stagnation and deteriora-  
49 tion over the entire period of observation. Even the low mortality benchmark exhibits a gradual  
50 downward trend, pointing to a generalised mortality increase. The state average female life ex-  
51 pectancy declined from 28.8 years (27.4 to 30.2) in 1990 to 28.3 years (27.4 to 29.2) in 2010. By  
52 2015, this average only managed to recover to 28.6 years (27.4 to 29.8). Among males, the av-  
53 erage over states decreased from 26.7 years (24.7 to 28.8) in 1990 to 26.3 years (24.9 to 27.6) in  
54 2010, and 26.5 years (25.3 to 27.7) in 2015. Furthermore, we fitted three linear models by sex  
55  
56  
57

1  
2  
3 and for both sexes,  $\beta$ , and the slope coefficient was significant in all of them at the level of  $p < .005$ . These results suggest that the decline observed was significant. As with young adult males, some states experienced deterioration after 2005, with a minor recovery since 2010.

8 [Figure 1 about here]

### 11 *Health disparities between states and age groups*

12 Figures 2-5 show results only for males because they exhibit the largest departures from the low mortality benchmark and higher inequality. Results for females are shown in the Additional file 1.

17 Figure 2 shows trends in inequalities between states in Mexico for males in our three age groups, as measured by the coefficient of variation (results for females are reported in Additional file 1, Figure 2). This indicator measures the between-state variation in the state-specific benchmark within each of the three age groups. Larger values are related to higher disparities between states. Trends show mixed patterns of convergence with temporary divergence around 2010, and with females in all cases showing less between-state inequality than males over the entire period studied.

27 There are important differences in inequality levels and trends between age groups. Since 1990, state inequality in life expectancy in the youngest age group has been decreasing. Among females, young adults show even lower between-state disparity than infants and children. However, for males in the young adult age-group there was a crossover in the early 2000's, with the coefficient of variation increasing after 2005. The highest values are observed in the period 2009-2011. By 2015, state inequalities among young adults had decreased substantially, but remained higher than that of the youngest age group. Older adults show substantially higher inequality than the other age groups over the entire period studied, but also show steady convergence between states. From 2013, both males and females show a potential rise in disparities between states, but we caution that this rise could be random variation as it only appears for 2 years (Additional file 1 Figure 2).

42 [Figure 2 about here]

46 To illustrate discordance between age groups within each state, Figure 3 shows the state ranking of temporary life expectancy for the years 2010-15 for males in each age group (see Additional file 1, Figure 3 for females' results). States at the top show the highest values in temporary life expectancy, while states in the bottom refer to the lowest expectancies. We chose to highlight those states with the most discordant age-rankings. Green and purple lines refer to selected states that show drastic changes in the ranking between different age groups. For example, Sinaloa, in the northern part of Mexico, holds the record life expectancy below age 15; however, young adults (15-49) show one of the lowest expectancies, while older adults are in the sixth position out of 32. Similar trajectories are shown with green lines for Nayarit and Mi-

1  
2  
3 choacán in the central region, Zacatecas in the North, as well as Morelos and Guerrero from the  
4 southern region. Conversely, the pattern of age discordance in Hidalgo, Querétaro and Mexico  
5 City from the central region, and Yucatan and Puebla in the South (purple lines) is summarised  
6 by changing from a low rank in the youngest age group to a high rank in young adults, followed  
7 by low rank in older adults.  
8  
9

10 We performed a two-way ANOVA on temporary life expectancy by state and age-groups con-  
11 trolling for year. There was a statistically significant interaction between the effects of states  
12 and age groups [ $F=12.25$ ,  $p < .001$ ] indicating, as shown in Figure 3, that part of the existing vari-  
13 ation in the country is due to variability within each state. There were also significant differ-  
14 ences in temporary life expectancy between age groups [ $p < .001$ ] and states [ $p < .001$ ] reflect-  
15 ing between-state variability, as shown in Figure 2.  
16  
17  
18  
19

20 [Figure 3 about here]  
21  
22  
23

#### 24 *Cause-decomposition analysis*

25 In Figures 4 and 5, the Mexican states in each region are arranged according to the largest gap  
26 with the low mortality benchmark among older adult males in 2015. Figure 4 shows how causes  
27 amenable to medical service, diabetes, ischemic heart diseases (IHD), lung cancer, cirrhosis,  
28 homicide, and road traffic accidents contributed to the gap between each state and the low  
29 mortality benchmark from 1990 to 2015 for older males (ages 50-84). These are the causes of  
30 death that contributed the most to holding states back from achieving the low mortality  
31 benchmark. Light-yellow colours indicate negligible contributions, which means that are very  
32 close to the low mortality benchmark within each category. Darker red hues indicate larger con-  
33 tributions to the gap. If a state is improving during the period, it shows a transition from red to  
34 light-yellow.  
35  
36  
37  
38

39 Medically amenable causes of death show gradual improvements in most states from 1990 to  
40 2015, bringing them closer to the benchmark in this category. However, large disparities persist  
41 between states and a strong potential for improvements remain. For example, Baja California,  
42 Sonora, Chihuahua, and Coahuila from the northern region show substantial contributions to  
43 the gap. Diabetes mortality has increasingly contributed to widening the benchmark gap in sev-  
44 eral states, including Coahuila and Tamaulipas in the North, Mexico City, Guanajuato, Mexico  
45 state, and Tlaxcala in the central region, and Puebla, Veracruz and Tabasco in the South. Similar-  
46 ly, IHD significantly affects the northern part of the country, while cirrhosis is mostly concen-  
47 trated in the South. Lung cancer and road traffic accidents have lower contributions to the  
48 benchmark gap, but these remain important causes of death. Homicides increased the gap in  
49 this age group in some states after 2005, such as Chihuahua, Durango and Sinaloa in the North,  
50 Colima, Michoacán and Nayarit in the central region, and Guerrero in the South.  
51  
52  
53

54 [Figure 4 about here]  
55  
56  
57  
58  
59  
60

1  
2  
3 Females show similar regional patterns to males, albeit of lower magnitudes. For males, causes  
4 amenable to medical service, diabetes, and IHD contributed the largest share to the gap with  
5 the low mortality benchmark among older adult females. In the youngest age group, improve-  
6 ments in life expectancy and in reducing the gap with the low mortality benchmark were mainly  
7 driven by causes amenable to medical service among both females and males. Finally, homicide  
8 mortality and road traffic accidents are the main drivers of the gap with the benchmark among  
9 young male adults (ages 15-49). Importantly, homicides contributed more than 2.5 years to the  
10 gap with the low mortality benchmark in 2010 in the northern state of Chihuahua, and several  
11 states from the North and South of Mexico showed substantial impacts from homicide after  
12 2005. Results for all age-groups are shown in Additional file 1, Figures 4-9.  
13  
14  
15

### 16 17 18 *Potential gains and causes of death in 2015*

19  
20 Figure 5 breaks down the state-specific low mortality benchmark gap for males aged 50-84 into  
21 potential gains and their cause of death composition. The left panel shows the potential gains  
22 for older adults if the low mortality benchmark were achieved for each state in 2015. The right  
23 panel shows the proportion of potential gains due to specific causes of death in the same year.  
24  
25

26 Every state in Mexico could increase survival by at least one year on average in older adult ages  
27 if they were to achieve the low mortality benchmark. However, for 17 of them the gap with the  
28 benchmark is higher than 2 years, and for 3 states in the northern region it is greater than 3  
29 years. For females, except for Sinaloa and Nayarit, all states show the potential to gain over an  
30 additional year of life between ages 50-84.  
31  
32

33 More than half of these potential gains in life expectancy between ages 50 and 84 are due to  
34 medically amenable causes, diabetes, IHD, and cirrhosis in every state in Mexico (right panel).  
35 This is true also for females. Although older males show lower impact of homicide mortality on  
36 potential gains compared to young adult males (15-49), its effect is present in almost every  
37 state, particularly in Guerrero, Morelos in the South, Nayarit and Colima in the central region,  
38 and Sinaloa in the North. Results for all the age groups for the years 2005, 2010, and 2015 are  
39 shown in the Additional file 1, Figures 10-18.  
40  
41  
42

43 [Figure 5 about here]  
44  
45

### 46 **Discussion**

47  
48 In Mexico since 1990, life expectancy in three large age groups has followed discordant patterns  
49 of rise, stagnation, and deterioration. These patterns were driven mainly by causes of death  
50 that are amenable to medical service (such as infectious and respiratory diseases) and health  
51 behaviours (such as homicides, suicide, diabetes, IHD, and cirrhosis). Patterns in these two large  
52 cause-of-death categories led to high levels of health inequality in the country.  
53  
54  
55  
56  
57  
58  
59  
60

1  
2  
3 Life expectancy below age 15 converged towards the low mortality benchmark and maximum  
4 survival in all 32 Mexican states. These results underscore public health interventions aimed at  
5 infants and children. This is supported by evidence that vaccination coverage has been achieved  
6 for the entire young population, and that health insurance coverage has improved, due to vac-  
7 cination programs and the implementation of *Seguro Popular* along with improvements in pre-  
8 viously existing health systems, respectively.<sup>9</sup> Causes amenable to medical service are at the  
9 heart of such improvements, consisting of decreases in infectious and respiratory diseases asso-  
10 ciated with public health interventions targeting children.<sup>6</sup> For example, Puebla and Tlaxcala (in  
11 the South and central regions respectively) were the states with the lowest life expectancy be-  
12 low age 15 in 1990, but they have since improved by more than half a year. Moreover, the aver-  
13 age over states improved from 14.5 in 1990 to 14.8 in 2015, with no state below 14.7. Because  
14 of continuous and nationwide convergence towards the low mortality benchmark, inequalities  
15 between states in life expectancy below age 15 have been reduced.  
16  
17  
18  
19

20  
21 Opposing the optimistic trend of infants and children, increases in homicide mortality reversed  
22 gains in male life expectancy, particularly between ages 15-49. These results are consistent with  
23 previous studies quantifying the effect of homicide mortality on the stagnation of national life  
24 expectancy at birth in the first decade of the 21st century,<sup>3</sup> and with the reversal experienced in  
25 life expectancy in most states between 2005 and 2010.<sup>14</sup> Our results extend such findings by  
26 adding five years of data and segmenting by three age groups capturing stages of the life  
27 course.<sup>34</sup> We found that after ten years of the unexpected rise in homicide mortality, most  
28 states have experienced a slow and partial recovery since 2010. However, the impact of homi-  
29 cide is still higher than the levels observed pre-2005. Between 2010 and 2015, homicides ac-  
30 counted for most of the gap between states and the low mortality benchmark in ages 15-49. For  
31 this age group, the states that show the greatest benchmark gap for homicide in 2015 are Guer-  
32 rero in the South, and Sinaloa and Chihuahua in the North, which could gain one year, and half a  
33 year (each) respectively if homicides were reduced to the level of the southern state of Yucatán,  
34 which in this case makes up 100% of the benchmark. Moreover, health inequalities in life expec-  
35 tancy between states followed the rise in homicides after 2005 (Figure 2), and the considerable  
36 discordance between age-groups (Figure 3) was likely due in great part to homicide mortality in  
37 ages 15-49. It is unclear how these levels of state life expectancy will change with the new re-  
38 ports which highlight a three year increase in homicide in Mexico.<sup>23,ii</sup> Further, the exposure that  
39 people have had to violence has triggered mental health problems, e.g. a widespread height-  
40 ened perception of vulnerability.<sup>15</sup> At the same time suicide is strongly linked to mental disor-  
41 ders.<sup>35</sup> Thus, if the Mexican health system does not have proper interventions to handle the  
42 mental health needs of the population, an increase in suicides might be observed in the future.  
43  
44  
45  
46  
47

48  
49 The population aged 50-84 shows the largest low mortality benchmark gap in both females and  
50 males. Out of 35 liveable years in this age group, females lived on average 28.6 years and males  
51 26.5 in 2015 without any clear improvement in the 26 years since 1990. Even the low mortality  
52 benchmark itself shows a downward trend for males and females (Figure 1). Moreover, this age  
53 group exhibits the highest inequality between states in the last 26 years. Our results show that  
54 causes of death holding states back from the low mortality benchmark vary between regions.  
55 Causes amenable to medical service showed gradual improvements in almost every state since  
56  
57  
58  
59  
60

1  
2  
3 1990. However, in some states of the northern region such as Baja California, Sonora, and Chi-  
4 huahua, these causes of death still show large room for improvements among older adults. Dia-  
5 betes, Ischemic Heart Diseases (IHD) and cirrhosis account for most of the gap with the bench-  
6 mark mortality, these display large regional differences. For example, IHD is mostly concentrat-  
7 ed in the North (Figure 4), while cirrhosis and diabetes show a stronger impact in the central  
8 and southern regions. These results are supported by previous evidence documenting an in-  
9 crease in adult mortality rates from chronic kidney disease, diabetes, and cirrhosis since 2000.<sup>16</sup>  
10 Lung cancer and homicides had a lower impact on life expectancy for this age group, and both  
11 are higher in the northern part of the country.  
12  
13  
14

### 15 **Strengths and limitations of the study**

16 Our analytical approach enables us to measure the years of life expectancy that could be gained  
17 in Mexican states by improving medically amenable mortality and behaviour-related mortality  
18 to the lowest levels presently observed in Mexico. This concept allows us to analyse patterns in  
19 life expectancy for different age groups over time and simultaneously account for changes in  
20 causes of death and inequality between states that have undergone major social and public  
21 health transitions.  
22  
23  
24

25 The limitations of our study should be mentioned. First, Mortality data from Mexico are likely to  
26 present inaccuracies in cause-of-death classification due to comorbidities, particularly at older  
27 ages.<sup>36</sup> To mitigate this, we focus on ages below 85 and broad cause-of-death groups. In addi-  
28 tion, road traffic accidents and homicides may happen not in the place of residence but in an-  
29 other state, which might cause differences in state specific mortality. Moreover, our estimates  
30 regarding homicide mortality are likely to be underestimated due to inaccurate coding and re-  
31 porting practices, and due to the large number of missing individuals in Mexico.<sup>37 38</sup> Similarly, in  
32 1997 a change in diagnosis criterion for diabetes took place, and this could have an impact on  
33 trends of mortality caused by diabetes in years adjacent to 1997.<sup>39</sup> In addition, underreported  
34 deaths and ill-defined causes of death could potentially bias our results. Mexico is considered to  
35 have high-quality data according to the Pan American Health Organization's criteria. Underre-  
36 ported deaths are estimated to be around 0.8%,<sup>40 41</sup> while ill-defined causes of death fell from  
37 2.1% of all deaths around 2000 to 1.7% more recently.<sup>40</sup> We expect our main findings to be ro-  
38 bust given the small percentages of ill-defined and underreported deaths. Finally, small popula-  
39 tion sizes could bias our results. As a robustness check, we calculated Confidence Intervals  
40 (95%) for all our estimates of temporary life expectancy, including the benchmark (see Supple-  
41 mentary material), and did not find major differences with our main results.  
42  
43  
44  
45  
46

47 Avoidable mortality should be understood as an indicator of potential weaknesses with respect  
48 to health care and some public health policies and not as a definitive assessment.<sup>10</sup> The number  
49 of deaths that should be considered avoidable is not clear<sup>42</sup>. For instance, some researchers  
50 consider only half of heart disease mortality to be avoidable.<sup>43 44</sup> There is no direct information  
51 to precisely measure percentages of avoidable mortality within cause groups in Mexico. None-  
52 theless, the difference between a given mortality schedule and the best mortality schedule of  
53 the same year can be conceived of as a minimal definition of avoidable mortality. The bench-  
54 mark mortality schedule sets a lower bound to how much mortality could have been avoided.  
55  
56  
57  
58  
59  
60



Certainly, even the best mortality schedule will contain elements of mortality that most would consider avoidable. To the extent that the components of the benchmark schedule were indeed attained somewhere in Mexico, one can view any excess mortality with respect to the benchmark schedule as presently avoidable. We believe this perspective improves on the AM concept by giving a directly measurable standard against which to estimate avoidable deaths.

## Implications of findings

Beyond the mortality implications of the rise in homicide, violence has had a toll on perceived vulnerability in the country.<sup>15</sup> The recent increase in homicides in some states could trigger an increase in the perception of vulnerability, which would result in a higher average lifetime experience of fear in specific states. Although we are not able to link the trends in mortality among young adults in Mexico with specific public policies, some evidence suggests that the propagation of homicide mortality is not only a result of the war between drug cartels, but also because of the implementation of specific policies aimed to mitigate drug cartel operations after 2006.<sup>45</sup> There is no simple way to lessen the impact of homicide mortality, but it is clear that the government has not been able to reduce its burden to levels observed before 2005. Furthermore, state homicide rates may underestimate the effect of violence in particular localities. For example, Guerrero in the South, has two of the most dangerous cities in the world,<sup>iii</sup> but no information is available on the heterogeneity in homicide mortality for the rest of the state.

The fact that in 2015 older adults in Mexico could add more than one year of life in every state for males, and in 30 states for females by achieving the benchmark mortality levels, underscores vulnerability in these ages. Public health interventions targeting specific causes of death for this age group according to the epidemiological profile of each state would not only increase state life expectancy, but it would also forge a path towards more equality between states in health outcomes. More than half of the potential gains in life expectancy between ages 50 and 84 are due to avoidable mortality, and to a large extent mortality related to health behaviours and medically amenable causes. For instance, obesity and overweight, risk factors for diabetes and IHD, have dramatically increased since the 1990s in developing countries because of the consumption of cheap, energy-dense food and reduced physical activity.<sup>46</sup> Mexico, along with the USA, has the highest prevalence of overweight and obesity among all OECD countries<sup>20</sup> and one of the highest in Latin America, along with Chile, El Salvador, Honduras, and Paraguay.<sup>47</sup> However, obesity prevalence is not homogeneous across Mexico. The highest rates of obesity are concentrated in the northern and central regions<sup>20</sup> and in urban areas of the country,<sup>48</sup> which roughly matches our regional pattern of IHD and diabetes mortality.

## Conclusion

Mexico stands today at an advanced stage of the epidemiological transition.<sup>16</sup> However this transition was achieved rapidly and the health system is ill-prepared for the burden of non-communicable diseases.<sup>49</sup> The cardiovascular mortality reductions that brought the developed

1  
2  
3 world into advanced levels of life expectancy, are still in progress in Mexico. Nevertheless, no  
4 single solution is available to reduce behavioural mortality in this country since, as we show,  
5 great heterogeneity in mortality levels exist between states.  
6  
7

8 Signs of a fragile situation in the health and mortality of the oldest age group is highlighted by  
9 the decline in the low mortality benchmark used in our analysis. Population ageing could scale  
10 up this situation if timely preventive measures are not put in place. Furthermore, a resurgence  
11 of violent deaths<sup>14 15 21</sup> has created a new burden in Mexican society.  
12  
13

14 As is the case in many developing countries, Mexico will have to face these new challenges with  
15 a broad strategy. This should include a continuous and adaptable health system ready for the  
16 current and future health adversities at the physical, mental, and societal levels. Many other  
17 institutions will also have to coevolve including importantly the development of an education  
18 system that embraces and encourages physical and healthy activities to diminish risk factors  
19 that contribute to the high prevalence of obesity and cirrhosis in Mexico. Finally, the burden of  
20 violence in recent years demonstrates the failure of current policies trying to mitigate violence  
21 in the country. New strategies that replace current ones are needed and embracing evidence  
22 based policies (e.g. drug policies) could be a new venue to eradicate the consequences of vio-  
23 lence on the Mexican population.  
24  
25  
26

27  
28 **Contributors:** JMA and TR contributed to data collection, study design, data analysis, and interpretation of the  
29 results, and wrote the first draft of the paper. VCR contributed to the study design, interpretation of the results,  
30 drafting of the paper, and finalising the paper.

31 **Funding:** JMA acknowledges support from the Max Planck Society (LIFEINEQ group, ERC-grant 716323), the  
32 European Doctoral School of Demography, and his current institution.

33 **Competing interest statement:** All authors have completed the Unified Competing Interest form and declare: no  
34 support from any organisation for the submitted work; no financial relationships with any organisations that might  
35 have an interest in the submitted work in the previous three years, no other relationships or activities that could  
36 appear to have influenced the submitted work.

37 **Data sharing:** All data used are publicly available in references 22 and 23. All the study is fully replicable at  
38 <https://github.com/jmaburto/DecompMex>

39 **Transparency:** The lead author\* affirms that this manuscript is an honest, accurate, and transparent account of the  
40 study being reported; that no important aspects of the study have been omitted; and that any discrepancies from  
41 the study as planned (and, if relevant, registered) have been explained.

42 **Ethical approval:** No ethical approval was needed from the institutions' boards since we work with anonymised  
43 aggregated publicly available datasets.  
44

#### 45 **Figures**

46 Figure 1. State-specific life expectancy trends (grey), average (black) and low mortality bench-  
47 mark (blue) for three age groups, the youngest (0-14), young adults (14-49), and older adults  
48 (50-84) by sex for the period 1990-2015. Source: calculations based on INEGI and CONAPO files.  
49

50 Figure 2. Inequality in male life expectancy between states for the youngest (0-14), young adults  
51 (15-49) and older adults (50-84), 1990-2015. Source: calculations based on INEGI and CONAPO  
52 files.  
53  
54  
55  
56  
57  
58  
59

1  
2  
3 Figure 3. Discordant age-rankings for average male life expectancy 2010-15 for the youngest (0-  
4 14), young adults (14-49), and older adults (50-84). Source: calculations based on INEGI and  
5 CONAPO files.  
6  
7

8 Figure 4. Cause-specific contributions to the gap between states and low mortality benchmark  
9 for older male adults (50-84), 1990-2015. Source: calculations based on INEGI and CONAPO files.  
10

11 Figure 5. State-specific gap with the low mortality benchmark and its cause-of-death composi-  
12 tion for older male adults (50-84) in 2015. Source: calculations based on INEGI and CONAPO  
13 files.  
14  
15

## 16 References

- 17 1. World Health Organization. The world health report 2000: health systems: improving performance:  
18 World Health Organization 2000.
- 19 2. Mexican Society of Demography. [Demographic reconciliation of Mexico and its states 1990–2010].  
20 Mexico City: SOMEDE-CONAPO; 2011. Conciliación demográfica de México y entidades  
21 federativas 1990–2010. Unpublished paper. Spanish2010.
- 22 3. Canudas-Romo V, García-Guerrero VM, Echarri-Cánovas CJ. The stagnation of the Mexican male life  
23 expectancy in the first decade of the 21st century: the impact of homicides and diabetes  
24 mellitus. *J Epidemiol Community Health* 2015;69(1):28-34.
- 25 4. Knaul FM, Frenk J. Health insurance in Mexico: achieving universal coverage through structural reform.  
26 *Health affairs* 2005;24(6):1467-76.
- 27 5. Neufeld LM. The Oportunidades Program and Child Growth: Mexico Perspectives. Handbook of  
28 Growth and Growth Monitoring in Health and Disease: Springer 2012:1659-71.
- 29 6. Sepúlveda J, Bustreo F, Tapia R, et al. Improvement of child survival in Mexico: the diagonal approach.  
30 *The Lancet* 2006;368(9551):2017-27.
- 31 7. Knaul FM, González-Pier E, Gómez-Dantés O, et al. The quest for universal health coverage: achieving  
32 social protection for all in Mexico. *The Lancet* 2012;380(9849):1259-79.
- 33 8. Byggbjerg I. Double burden of noncommunicable and infectious diseases in developing countries.  
34 *Science* 2012;337(6101):1499-501.
- 35 9. Urquieta-Salomón JE, Villarreal HJ. Evolution of health coverage in Mexico: evidence of progress and  
36 challenges in the Mexican health system. *Health policy and planning* 2015;31(1):28-36.
- 37 10. Nolte E, McKee CM. Measuring the health of nations: updating an earlier analysis. *Health affairs*  
38 2008;27(1):58-71.
- 39 11. Nolte E, McKee M. Measuring the health of nations: analysis of mortality amenable to health care.  
40 *Bmj* 2003;327(7424):1129.
- 41 12. Franco-Marina F, Lozano R, Villa B, et al. La mortalidad en México, 2000-2004. Muertes Evitables:  
42 magnitud, distribución y tendencias. *Dirección General de Información en Salud, Secretaría de*  
43 *Salud México* 2006:2.
- 44 13. Dávila-Cervantes CA, Agudelo-Botero M. Mortalidad evitable en México y su contribución a los años  
45 de vida perdidos: Análisis por grado de marginación estatal, 2001-2010. *Papeles de población*  
46 2014;20(82):267-86.
- 47 14. Aburto JM, Beltrán-Sánchez H, García-Guerrero VM, et al. Homicides in Mexico reversed life  
48 expectancy gains for men and slowed them for women, 2000–10. *Health Affairs* 2016;35(1):88-  
49 95.  
50  
51  
52  
53  
54  
55  
56  
57  
58  
59  
60

15. Canudas-Romo V, Aburto JM, García-Guerrero VM, et al. Mexico's epidemic of violence and its public health significance on average length of life. *Journal of epidemiology and community health* 2017;71(2):188-93.
16. Gómez-Dantés H, Fullman N, Lamadrid-Figueroa H, et al. Dissonant health transition in the states of Mexico, 1990–2013: a systematic analysis for the Global Burden of Disease Study 2013. *The Lancet* 2016;388(10058):2386-402.
17. Whelpton PK, Eldridge HT, Seigel JS. Forecasts of the Population of the United States, 1945-1975: US Govt. Print. Off. 1948.
18. Wunsch G. A minimum life-table for Europe. *European Demographic Information Bulletin* 1975;5(1):2-10.
19. Vallin J, Meslé F. Minimum Mortality: A Predictor of Future Progress? *Population-E* 2008;63(04):557-90.
20. González-Pier E, Barraza-Lloréns M, Beyeler N, et al. Mexico's path towards the Sustainable Development Goal for health: an assessment of the feasibility of reducing premature mortality by 40% by 2030. *The Lancet Global Health* 2016;4(10):e714-e25.
21. Gamlin J. Violence and homicide in Mexico: a global health issue. *The Lancet* 2015;385(9968):605-06.
22. Frenk J. Bridging the divide: global lessons from evidence-based health policy in Mexico. *The Lancet* 2006;368(9539):954-61.
23. INEGI. Estadísticas vitales Mortalidad. *National Institute of Statistics Mexico* 2017
24. CONAPO. Mexican Population Council: Population estimates. 2017 [Available from: <https://datos.gob.mx/busca/dataset/activity/proyecciones-de-la-poblacion-de-mexico> accessed 21/4/2017 2017.
25. Patel KV, Peek MK, Wong R, et al. Comorbidity and disability in elderly Mexican and Mexican American adults: findings from Mexico and the southwestern United States. *Journal of aging and health* 2006;18(2):315-29.
26. Arriaga EE. Measuring and explaining the change in life expectancies. *Demography* 1984;21(1):83-96.
27. Canudas-Romo V, Liu L, Zimmerman L, et al. Potential gains in reproductive-aged life expectancy by eliminating maternal mortality: a demographic bonus of achieving MDG 5. *PloS one* 2014;9(2):e86694.
28. González-González C, Sánchez-García S, Juárez-Cedillo T, et al. Health care utilization in the elderly Mexican population: expenditures and determinants. *BMC public health* 2011;11(1):192.
29. Camarda CG. MortalitySmooth: An R Package for Smoothing Poisson Counts with P-Splines. *Journal of Statistical Software* 2012;50:1-24.
30. Wilmoth JR, Andreev K, Jdanov D, et al. Methods protocol for the human mortality database. *University of California, Berkeley, and Max Planck Institute for Demographic Research, Rostock* URL: <http://mortality.org> [version 31/05/2007] 2007;9:10-11.
31. Preston S, Heuveline P, Guillot M. Demography: measuring and modeling population processes 2000.
32. Horiuchi S, Wilmoth JR, Pletcher SD. A decomposition method based on a model of continuous change. *Demography* 2008;45(4):785-801.
33. Aburto JM, van Raalte A. Lifespan dispersion in times of life expectancy fluctuation: the case of Central and Eastern Europe. *Demography* 2018 (in press).
34. Remund A, Camarda CG, Riffe T. A cause-of-death decomposition of young adult excess mortality. *Demography* 2018:1-22.
35. Zalsman G, Hawton K, Wasserman D, et al. Suicide prevention strategies revisited: 10-year systematic review. *The Lancet Psychiatry* 2016;3(7):646-59.
36. Hernández B, Ramírez-Villalobos D, Romero M, et al. Assessing quality of medical death certification: concordance between gold standard diagnosis and underlying cause of death in selected Mexican hospitals. *Population health metrics* 2011;9(1):38.

- 1  
2  
3 37. Steinberg N. Neither Rights Nor Security: Killings, Torture, and Disappearances in Mexico's War on  
4 Drugs: Human Rights Watch 2011.
- 5 38. Wright MW. Epistemological Ignorances and Fighting for the Disappeared: Lessons from Mexico.  
6 *Antipode* 2017;49(1):249-69.
- 7 39. Gavin JR, Alberti KG, Davidson MB, et al. Report of the expert committee on the diagnosis and  
8 classification of diabetes mellitus. *Diabetes care* 2003;26(SUPPL. 1)
- 9 40. World Health Organization. Global health observatory data repository 2018. Available at *who*  
10 *int/gho/data/node main A* 2018;364
- 11 41. World Health Organization. Enfermedades transmisibles y análisis de salud/información y análisis de  
12 Salud: Situación de salud en las Américas: Indicadores Básicos 2013: OPS Washington^ eD. C DC,  
13 2013.
- 14 42. Beltrán-Sánchez H. Avoidable mortality. International handbook of adult mortality: Springer  
15 2011:491-508.
- 16 43. Nolte E, McKee CM. In amenable mortality—deaths avoidable through health care—progress in the  
17 US lags that of three European countries. *Health Affairs* 2012;10.1377/hlthaff. 2011.0851.
- 18 44. Holland W. Commentary: should we not go further than descriptions of avoidable mortality?  
19 *International journal of epidemiology* 2003;32(3):447-48.
- 20 45. Espinal-Enríquez J, Larralde H. Analysis of México's Narco-War Network (2007–2011). *PloS one*  
21 2015;10(5):e0126503.
- 22 46. Hossain P, Kawar B, El Nahas M. Obesity and diabetes in the developing world—a growing challenge.  
23 *New England journal of medicine* 2007;356(3):213-15.
- 24 47. Aschner P. Obesity in Latin America. *Metabolic Syndrome: A Comprehensive Textbook* 2016:33-39.
- 25 48. Kuri-Morales P, Emberson J, Alegre-Díaz J, et al. The prevalence of chronic diseases and major disease  
26 risk factors at different ages among 150 000 men and women living in Mexico City: cross-  
27 sectional analyses of a prospective study. *BMC Public Health* 2009;9(1):9.
- 28 49. Rivera JA, Barquera S, Campirano F, et al. Epidemiological and nutritional transition in Mexico: rapid  
29 increase of non-communicable chronic diseases and obesity. *Public health nutrition*  
30 2002;5(1a):113-22.
- 31  
32  
33  
34  
35  
36

## 37 Endnotes

38  
39 <sup>i</sup> The percentage of the population aged 65 or older is projected to go from 6.0% in 2015 to 10.2% in  
40 2030 (Reference: CONAPO)

41 <sup>ii</sup> [<https://www.businessinsider.com.au/homicides-hit-new-high-mexico-alongside-increase-in-robberies-2017-11?r=US&IR=T>]

42 <sup>iii</sup> [<http://www.economist.com/blogs/graphicdetail/2017/03/daily-chart-23>]

43  
44  
45

## 46 Additional Files

47 Additional file 1 | Supplemental material

48  
49  
50  
51  
52  
53  
54  
55  
56  
57  
58  
59  
60

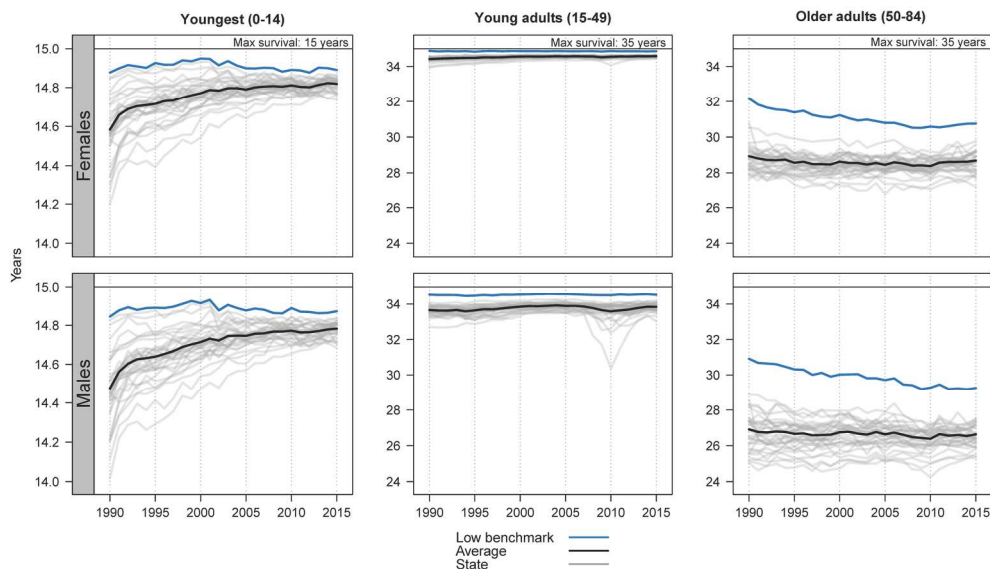

Figure 1. State-specific life expectancy trends (grey), average (black) and low mortality benchmark (blue) for three age groups, the youngest (0-14), young adults (14-49), and older adults (50-84) by sex for the period 1990-2015. Source: calculations based on INEGI and CONAPO files.

177x103mm (300 x 300 DPI)

1  
2  
3  
4  
5  
6  
7  
8  
9  
10  
11  
12  
13  
14  
15  
16  
17  
18  
19  
20  
21  
22  
23  
24  
25  
26  
27  
28  
29  
30  
31  
32  
33  
34  
35  
36  
37  
38  
39  
40  
41  
42  
43  
44  
45  
46  
47  
48  
49  
50  
51  
52  
53  
54  
55  
56  
57  
58  
59  
60

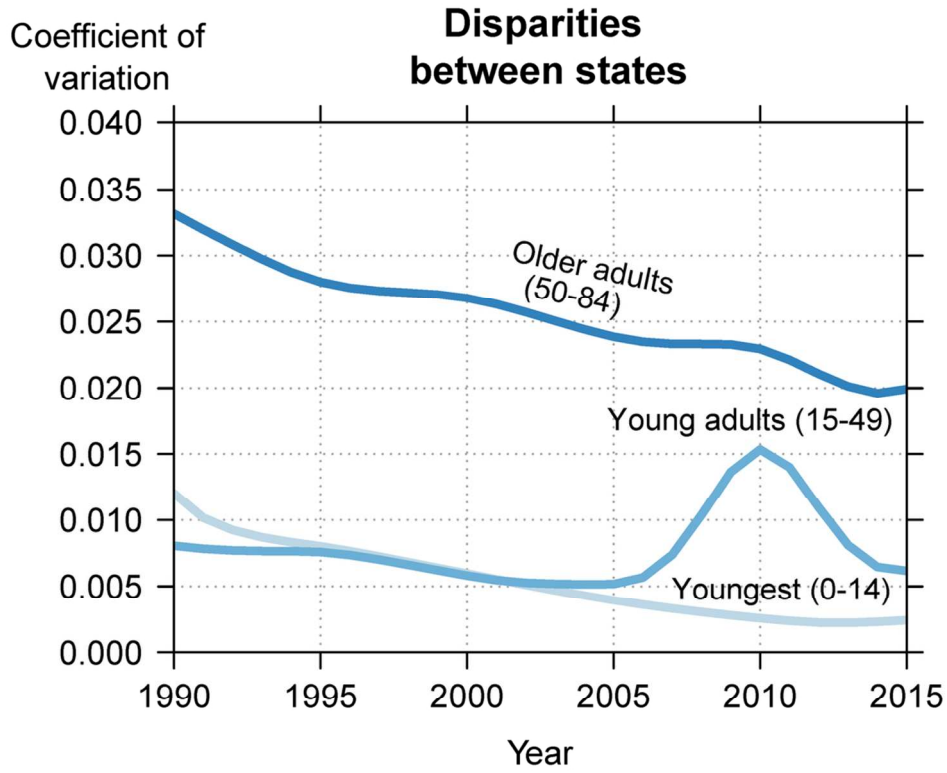

Figure 2. Inequality in male life expectancy between states for the youngest (0-14), young adults (15-49) and older adults (50-84), 1990-2015. Source: calculations based on INEGI and CONAPO files.

101x81mm (300 x 300 DPI)

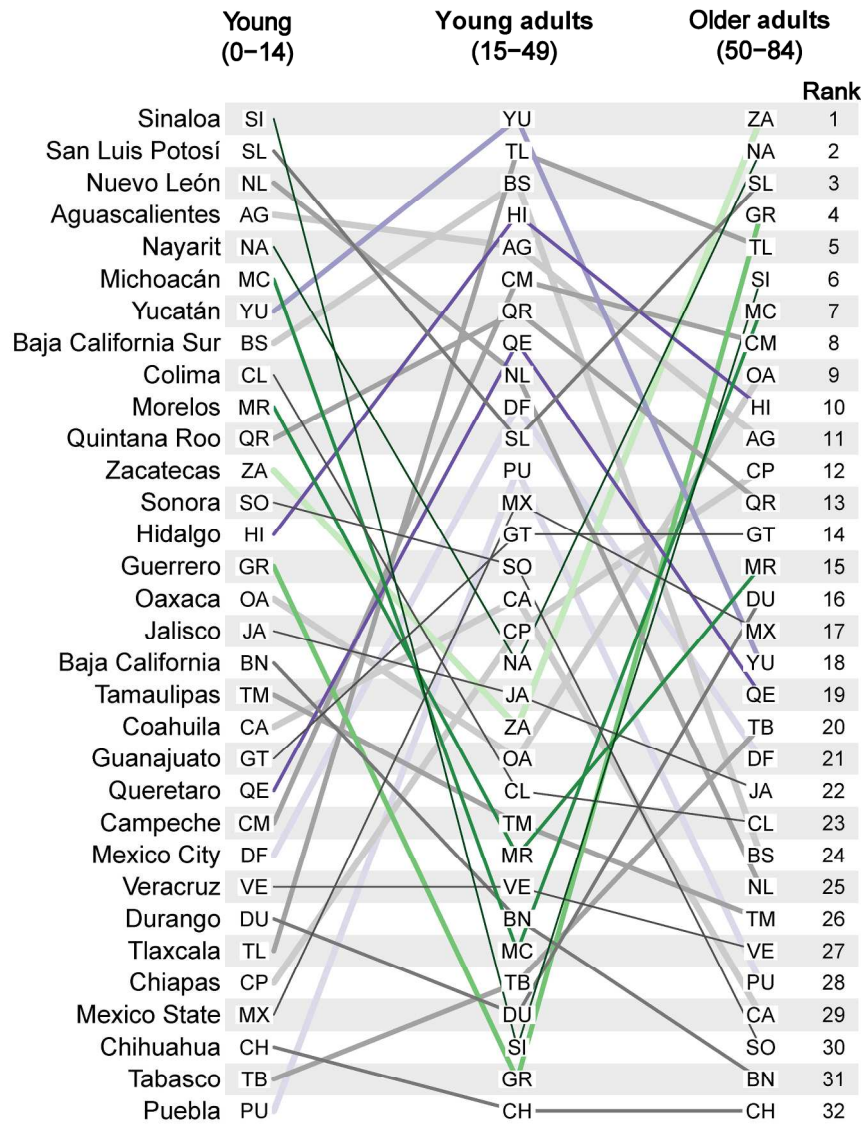

Figure 3. Discordant age-rankings for average male life expectancy 2010-15 for the youngest (0-14), young adults (14-49), and older adults (50-84). Source: calculations based on INEGI and CONAPO files.

203x270mm (300 x 300 DPI)



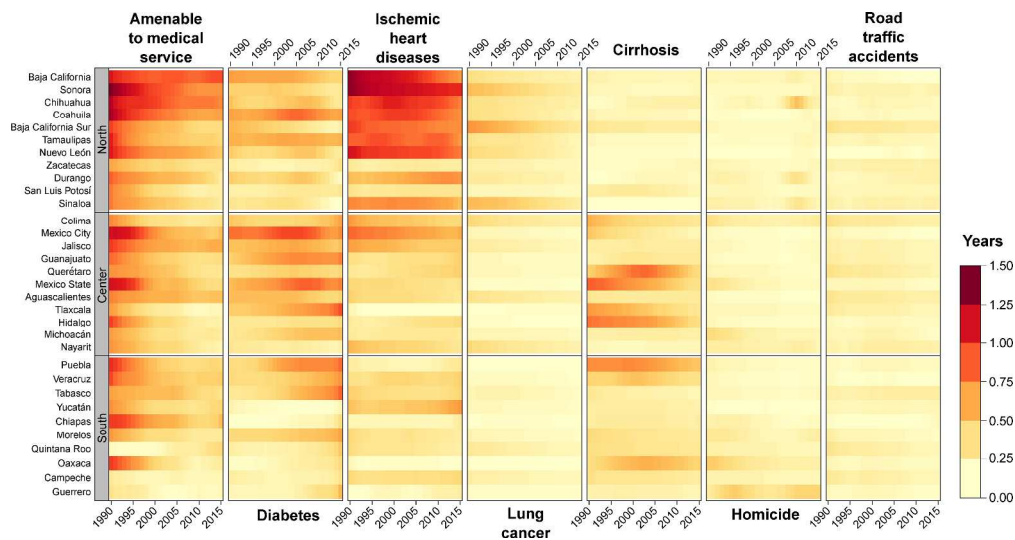

Figure 4. Cause-specific contributions to the gap between states and low mortality benchmark for older male adults (50-84), 1990-2015. Source: calculations based on INEGI and CONAPO files.

511x267mm (300 x 300 DPI)

review only

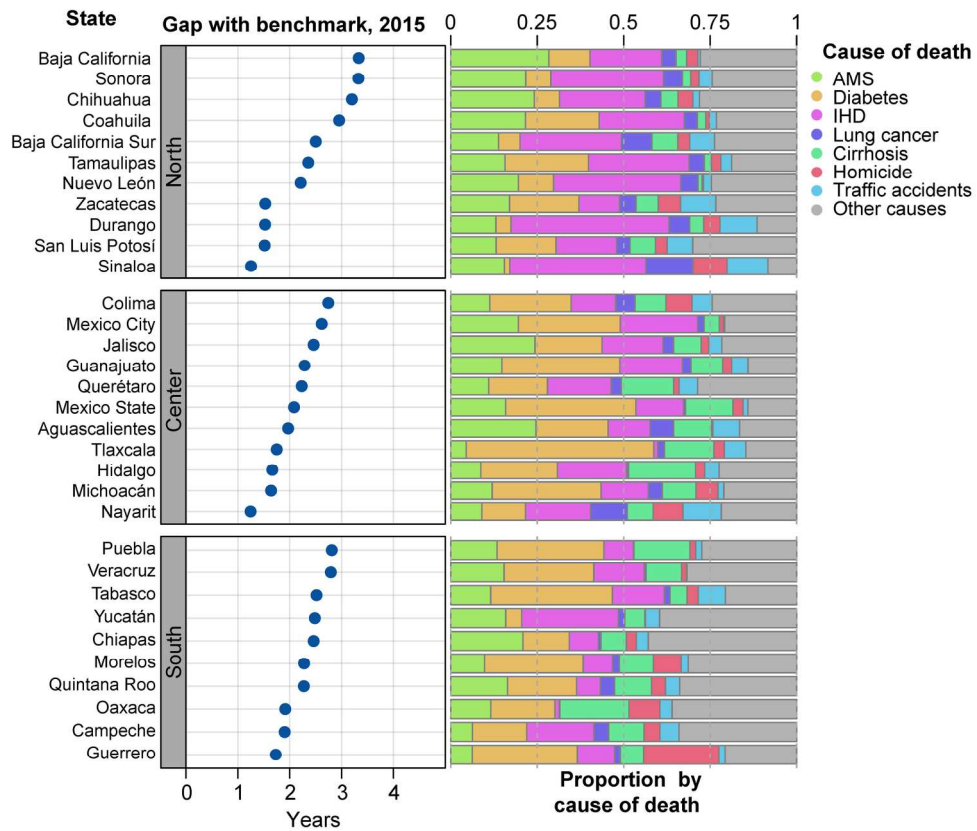

Figure 5. State-specific gap with the low mortality benchmark and its cause-of-death composition for older male adults (50-84) in 2015. Source: calculations based on INEGI and CONAPO files.

177x155mm (300 x 300 DPI)

# Trends in avoidable mortality over the life course in Mexico, 1990-2015: A cross-sectional demographic analysis

José Manuel Aburto<sup>1</sup>, Tim Riffe<sup>2</sup>, and Vladimir Canudas-Romo<sup>3</sup>

<sup>1</sup>University of Southern Denmark

<sup>2</sup>Max Planck Institute for Demographic Research

<sup>3</sup>School of Demography, Australian National University

July 6, 2018

## Abstract

**Objective:** To analyse average lifespan and quantify the effect of Avoidable/Amenable mortality on the difference between state-specific mortality and a low-mortality benchmark in Mexico during 1990-2015.

**Design:** Retrospective cross-sectional demographic analysis using aggregated data.

**Setting:** Vital statistics from the Mexican civil registration system.

**Participants:** Aggregated national data (from 91.2 million people in 1995 to 119.9 in 2015) grouped in 64 populations (32 Mexican-states [including Mexico City] by sex) with cause-of-death data.

**Main outcome measures:** Cause-specific contributions to the gap in life expectancy with a low-mortality benchmark in three age groups (0-14, 15-49 and 50-84).

**Results:** Infants and children under age 15 show improvements towards maximal survival in all states. However, adult males aged 15 to 49 show deterioration after 2006 in almost every state due to increasing homicides, and a slow recovery thereafter. Out of 35 potential years, females and males live on average 34.57 (34.48 to 34.67) and 33.80 (33.34 to 34.27), respectively. Adults aged 50 to 84 show an unexpected decrease in the low mortality benchmark, indicating nationwide deterioration among older adults. Females and males in this age group show an average survival of 28.59 (27.43 to 29.75) and 26.52 (25.33 to 27.73) out of 35 potential years, respectively. State gaps from the benchmark were mainly caused by ischemic heart diseases, diabetes, cirrhosis and homicides. We find large health disparities between states, particularly for the adult population after 2005.

**Conclusions:** Mexico has succeeded in reducing mortality and between-state inequalities in children. However, adults are becoming vulnerable as they have not been able to reduce the burden of violence and conditions amenable to health services and behaviours, such as diabetes, ischemic heart diseases and cirrhosis. These trends have led to large health disparities between Mexican states in the last 25 years.

## Supplemental material

Appendix Table 1. Definitions of cause-of-death categories using the 9th and 10th revision of the International Classification of Diseases.

| Category                                                                                                                                                                                                                                                                                                                                                          | ICD-10                                                                                                                                                                      | ICD-9                                                                                                                             |
|-------------------------------------------------------------------------------------------------------------------------------------------------------------------------------------------------------------------------------------------------------------------------------------------------------------------------------------------------------------------|-----------------------------------------------------------------------------------------------------------------------------------------------------------------------------|-----------------------------------------------------------------------------------------------------------------------------------|
| <b>I. Amenable to medical service</b>                                                                                                                                                                                                                                                                                                                             |                                                                                                                                                                             |                                                                                                                                   |
| I.A. AM-Infectious & respiratory diseases : intestinal infections, tuberculosis, zoonotic bacterial diseases, other bacterial diseases, septicemia, poliomyelitis, measles, rubella, infectious hepatitis, ornithosis, rickettsioses/arthropod-borne, syphilis (all forms), yaws, respiratory diseases, influenza & pneumonia, chronic lower respiratory diseases | A00-A09, A16-A19, B90, A20-A26, A28, A32, A33, A35, A36, A37, A40-A41, A80, B05-B06, B15-B19, A70, A68, A75, A77, A50-A64, A66, J00-J08, J20-J39, J60-J99, J09-J18, J40-J47 | 001-009, 010-018, 32, 33, 37, 137, 020-027, 38, 45, 55-56, 70, 73, 080-082, 087, 090-099, 102, 460-479, 500-519, 480-488, 490-496 |
| I.B. AM-Cancers: malignant neoplasm of colon, skin, breast, cervix, prostate, testis, bladder, kidney-Wilm's tumor only, eye, thyroid carcinoma, Hodgkins disease, leukemia                                                                                                                                                                                       | C16,C18-C21, C43-C44, C50, C53, C61, C62, C67, C64, C69, C73, C81, C91-C95                                                                                                  | 153-154, 172-173, 174, 180, 185, 186, 188-189, 190, 193, 201, 204-208                                                             |
| I.C. AM-Circulatory: active/acute rheumatic fever, chronic rheumatic heart disease, hypertensive disease, cerebrovascular disease                                                                                                                                                                                                                                 | I00-I02, I05-I09, I10-I13, I15, I60-I69                                                                                                                                     | 390-392, 393-398, 401-405, 430-438                                                                                                |
| I.D. AM-Birth: maternal deaths (all), congenital cardiovascular anomalies, perinatal deaths (excluding stillbirths)                                                                                                                                                                                                                                               | O00-O99, Q20-Q28, P00-P96                                                                                                                                                   | 630-676, 745-747, 760-779                                                                                                         |
| I.E. AM-Other: disease of thyroid, epilepsy, peptic ulcer, appendicitis, abdominal hernia, cholelithiasis & cholecystitis, nephritis, benign prostatic hyperplasia, misadventures to patients during surgical or medical care, cisticercosis                                                                                                                      | E00-E07, 40-G41, K25-K27, K35-K38, K40-K46, K80-K81, N00-N07, N17-N19, N25-N27, N40, Y60-Y69, Y83-Y84, B69                                                                  | 240-246, 345, 531-533, 540-543, 550-553, 574-575.1, 580-589, 600, E870-E876, E878-E879                                            |
| <b>II. Diabetes</b>                                                                                                                                                                                                                                                                                                                                               | E10-E14                                                                                                                                                                     | 250                                                                                                                               |
| <b>III. Ischemic Heart Diseases (IHD)</b>                                                                                                                                                                                                                                                                                                                         | I20-I25                                                                                                                                                                     | 410-414, 429.2                                                                                                                    |
| <b>IV. Lung cancer</b>                                                                                                                                                                                                                                                                                                                                            | C33-C34                                                                                                                                                                     | 162                                                                                                                               |
| <b>V. Cirrhosis</b>                                                                                                                                                                                                                                                                                                                                               | K70                                                                                                                                                                         | 571.1-571.3                                                                                                                       |
| <b>VI. Homicides</b>                                                                                                                                                                                                                                                                                                                                              | X85-Y09                                                                                                                                                                     | E960-E969                                                                                                                         |
| <b>VII. Road traffic accidents</b>                                                                                                                                                                                                                                                                                                                                | V01-V99                                                                                                                                                                     | E810-E819                                                                                                                         |
| <b>VIII. Suicide and self-inflicted injuries</b>                                                                                                                                                                                                                                                                                                                  | E950-E959                                                                                                                                                                   | X60-X84, Y87.0                                                                                                                    |
| <b>IX. Residual Causes : HIV/AIDS; other cancers and other heart diseases</b>                                                                                                                                                                                                                                                                                     | B20-B24, U03; C00-D48; I00-I99 if not listed above; R00-R99                                                                                                                 | 042-044;140-239; 390-459 if not listed above; 780-799                                                                             |

## Temporary Life Expectancy

Temporary life expectancy between ages  $x_1$  and  $x_2$ , for  $x_1 < x_2$ , is defined as the average years of life lived between these ages according to a given set of mortality rates (Arriaga 1984). We denote this quantity as  ${}_{(x_2-x_1)}e_{x_1}$ , and its benchmark based on minimum death rates for every age and cause of death among the Mexican states for each year as  ${}_{(x_2-x_1)}e_{x_1}^*$ . Defined in terms of the life table survival function,  $\ell(x)$ :

$${}_{(x_2-x_1)}e_{x_1} = \frac{\int_{x_1}^{x_2} \ell(x) dx}{\ell(x_1)} \quad (1)$$

If full survival is achieved, the life expectancy is  $x_2 - x_1$ . For example, if we set  $x_1 = 0$  and  $x_2 = 15$ , and no person dies between the ages 0 and 15, on average the population lives 15 full years.

## Decomposition method

The decomposition method used in this paper relies on a model of demographic functions based on continuous change (Horiuchi et al. 2008). Suppose  $P$  (e.g. temporary life expectancy between ages 15 and 49) is a differentiable function of  $n$  covariates (e.g. each age-cause specific mortality rate) denoted by the vector  $\mathbf{A} = [x_1, x_2, \dots, x_n]^T$ . We assume that  $\mathbf{A}$  is a differentiable function between  $P_1$  and  $P_2$ , then the difference in  $P$  between  $P_1$  and  $P_2$  can be expressed as follows:

$$P_2 - P_1 = \sum_{i=1}^n \int_{x_i(P_1)}^{x_i(P_2)} \frac{\partial P}{\partial x_i} dx_i = \sum_{i=1}^n c_i, \quad (2)$$

where  $c_i$  is the total change in  $P$  produced by changes in the  $i$ -th covariate,  $x_i$ . The  $c_i$ 's in equation (2) were computed by numerical integration following the algorithm suggested by Horiuchi et al. (2008). This method has the advantage of assuming that covariates change gradually along the time dimension.

1  
2  
3  
4  
5  
6  
7  
8  
9  
10  
11  
12  
13  
14  
15  
16  
17  
18  
19  
20  
21  
22  
23  
24  
25  
26  
27  
28  
29  
30  
31  
32  
33  
34  
35  
36  
37  
38  
39  
40  
41  
42  
43  
44  
45  
46  
47  
48  
49  
50  
51  
52  
53  
54  
55  
56  
57  
58  
59  
60

Figure 1: Cause-specific death counts (different *y*-scale for each cause), 1990-2010.

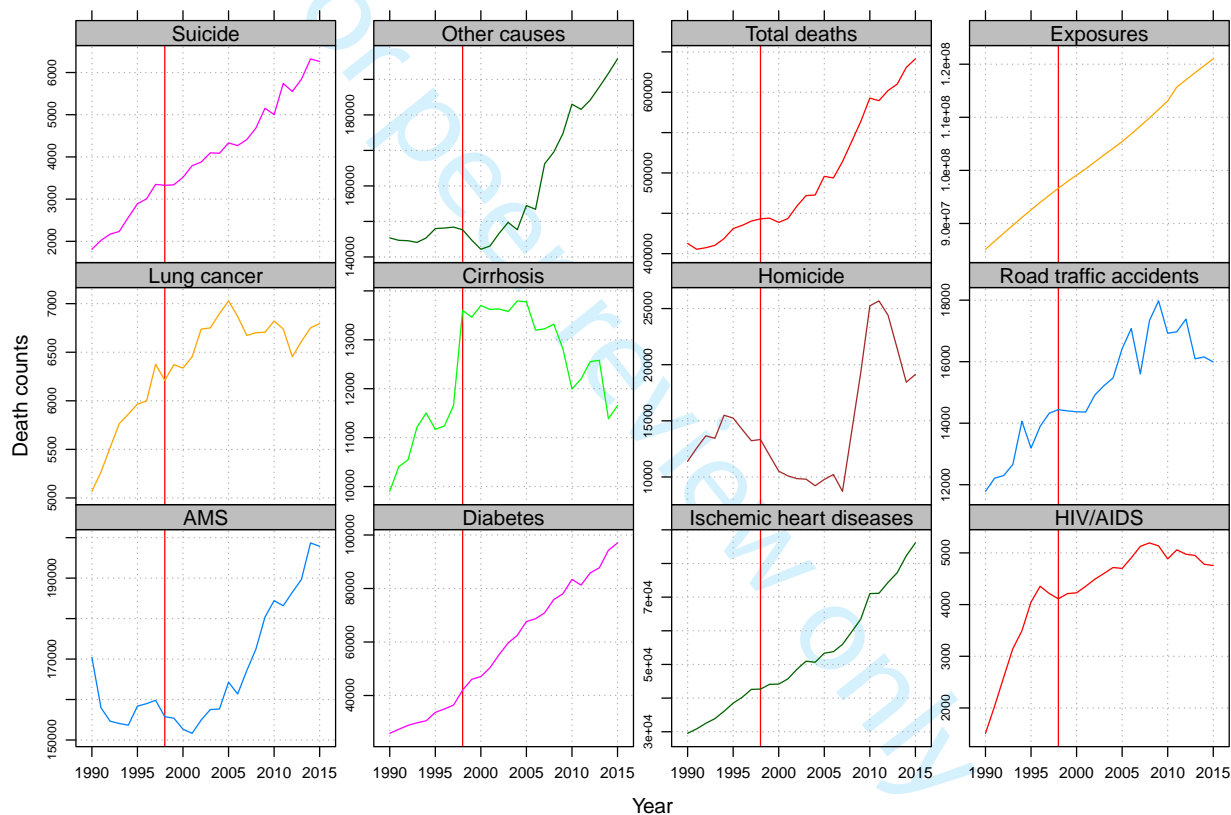

Note: AMS “amenable to medical service”. The red line indicates the change from ICD 9 to ICD 10.

# Robustness check: 95% CIs for male temporary life expectancies

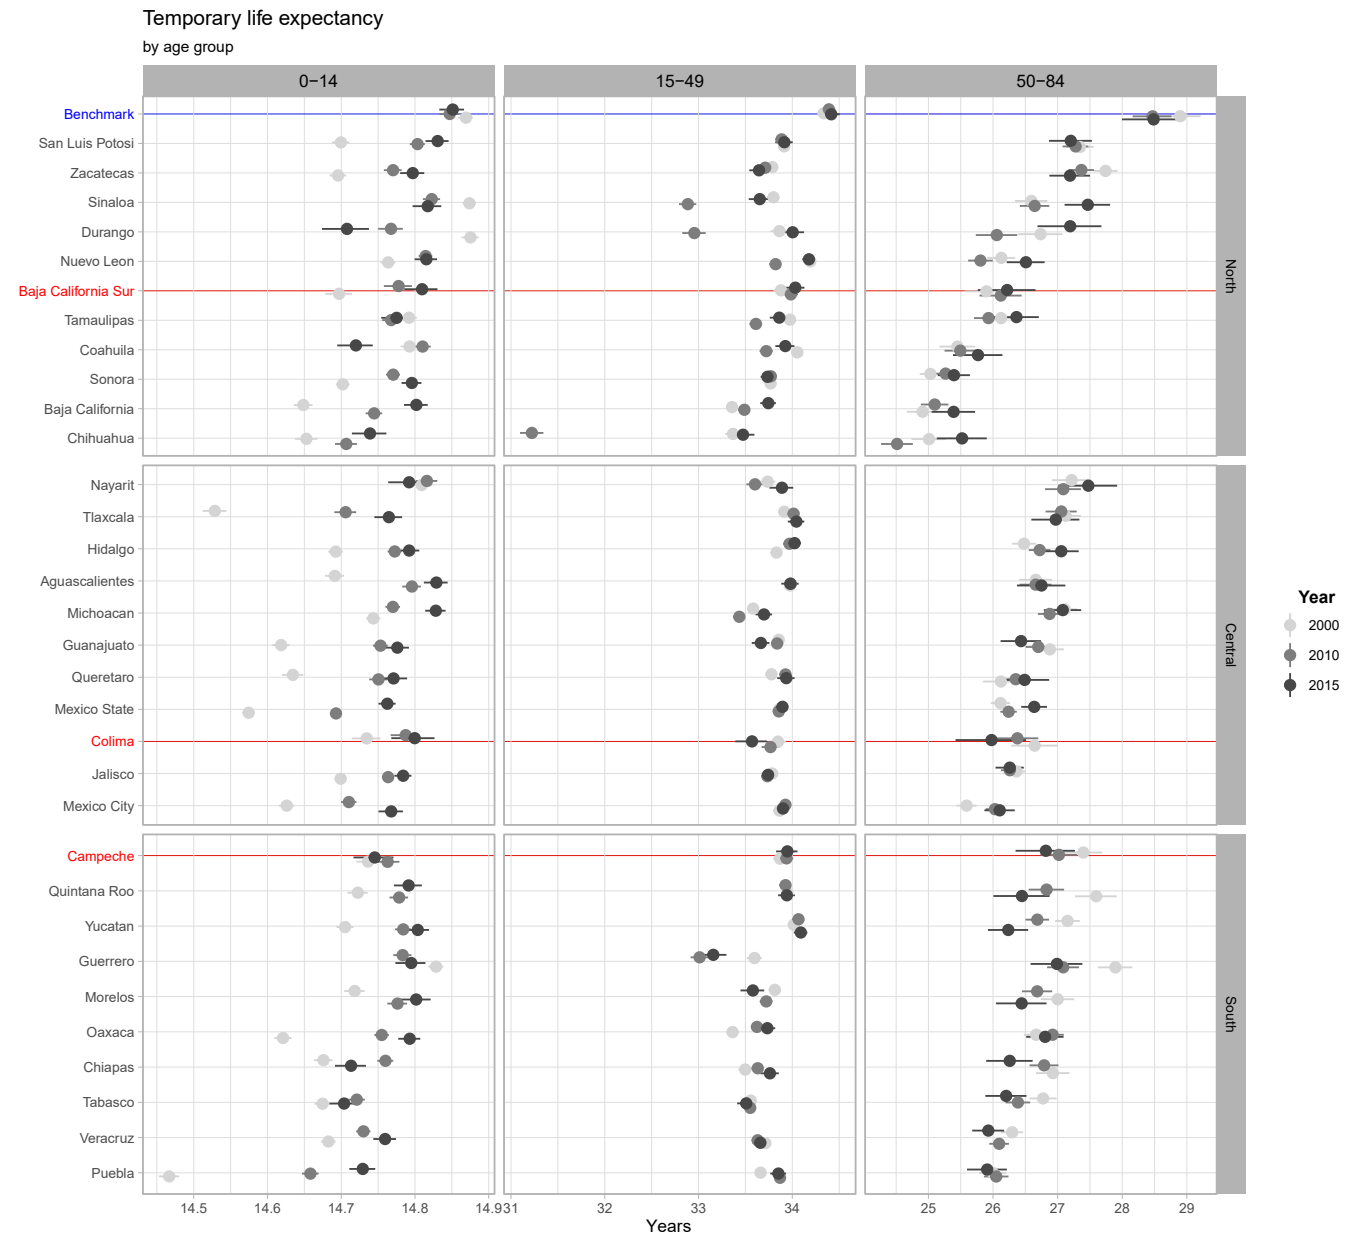

Note: States highlighted in red had less than 1 million population in 2010.

## References

Arriaga, E. E. (1984). Measuring and explaining the change in life expectancies. *Demography*, 21(1):83–96.

Horiuchi, S., Wilmoth, J. R., and Pletcher, S. D. (2008). A decomposition method based on a model of continuous change. *Demography*, 45(4):785–801.

Figure 2: Inequality in life expectancy between states for youngest (0-14), young adults (15-49), and older adults (50-84) by sex, 1990-2015.



Figure 3: State ranking for average female life expectancy 2010-15 for the youngest (0-14), young adults (15-49), and older adults (50-84).

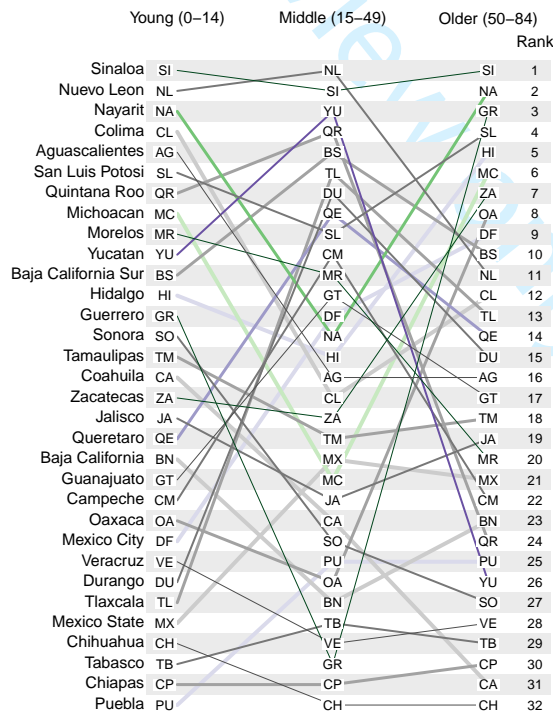

Source: calculations based on INEGI and CONAPO files.



Figure 4: Cause-specific contributions to state differences from low mortality benchmark for older male adults (ages 50-84), 1990-2015. States grouped into three regions. Reproduced from manuscript Figure 4 to have color scale comparable with other Supplementary figures. In subsequent figures 5-9 the color was rescaled to make them comparable over age groups in the supplemental material, the maximum value observed was 2.6 years caused by homicides in Chihuahua in 2010.

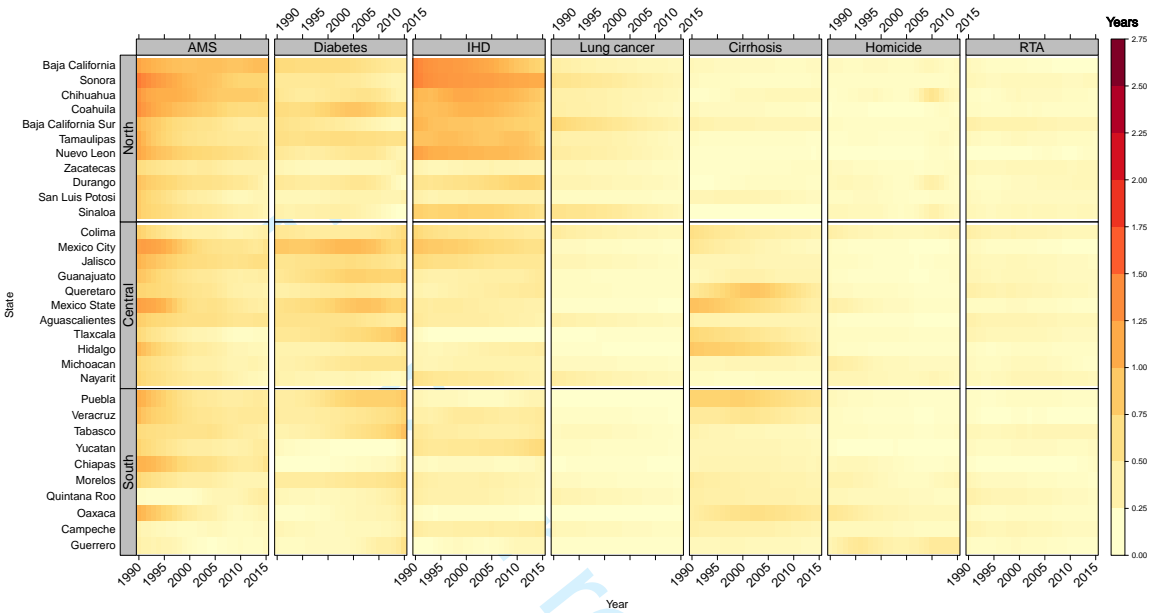

Note:  
AMS is “amenable to medical service”, IHD is “ischemic heart diseases”, and RTA is “road traffic accidents”. Source: own calculations.

Figure 5: Cause-specific contributions to state differences from low mortality benchmark for older female adults (ages 50-84), 1990-2015.

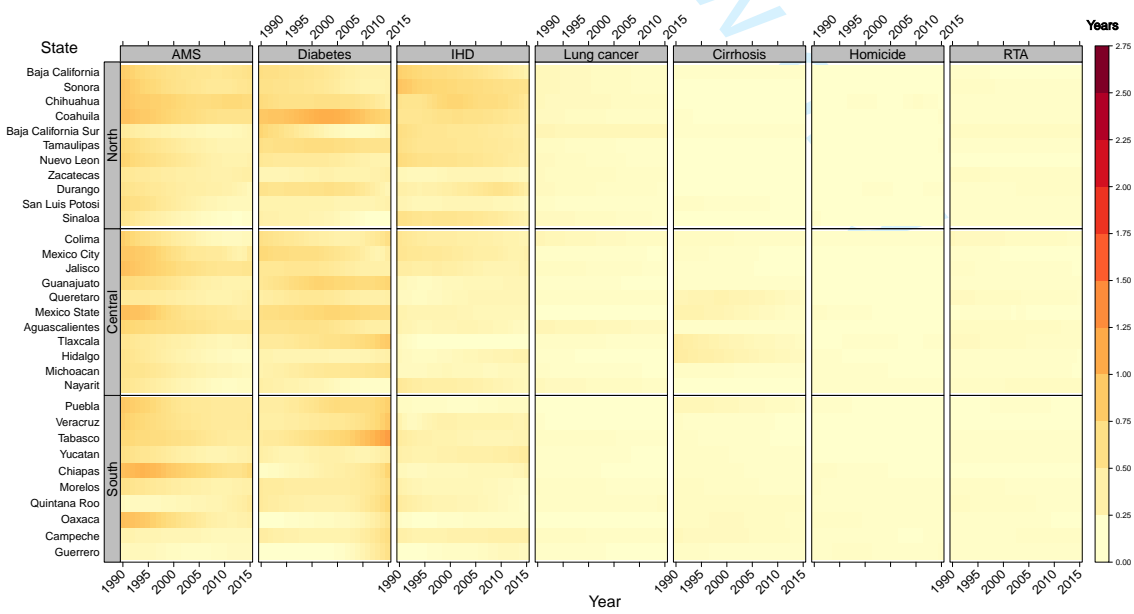

Note:  
AMS is “amenable to medical service”, IHD is “ischemic heart diseases”, and RTA is “road traffic accidents”. Source: own calculations.

Figure 6: Cause-specific contributions to state differences from low mortality benchmark for male youngest population (ages 0-14), 1990-2015.

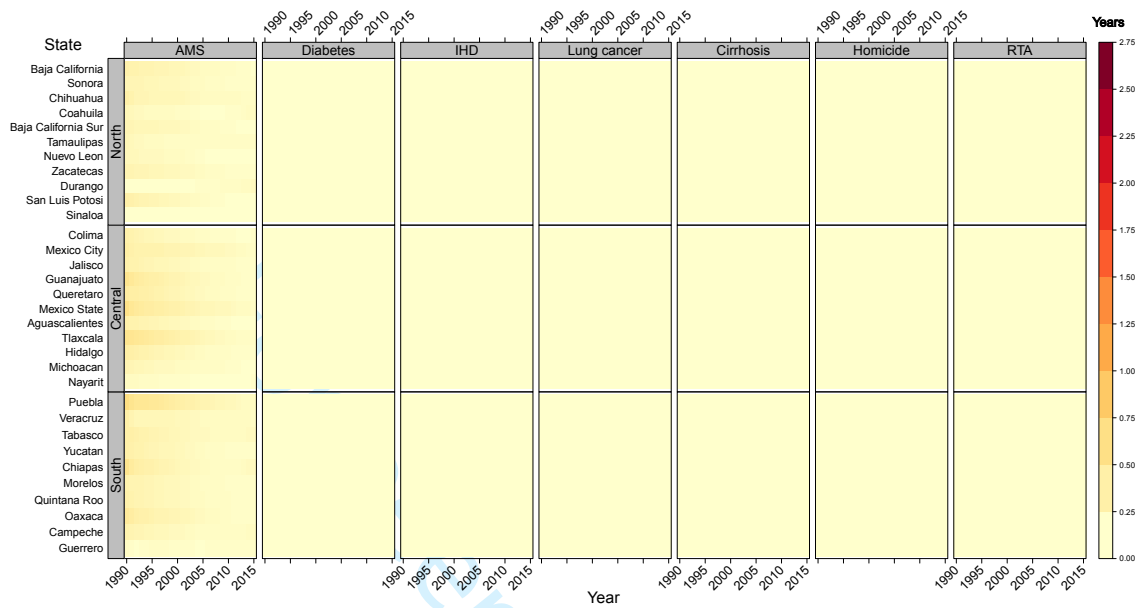

Note: AMS is “amenable to medical service”, IHD is “isquemic heart diseases”, and RTA is “road traffic accidents”. Source: own calculations.

Figure 7: Cause-specific contributions to state differences from low mortality benchmark for female youngest population (ages 0-14), 1990-2015.

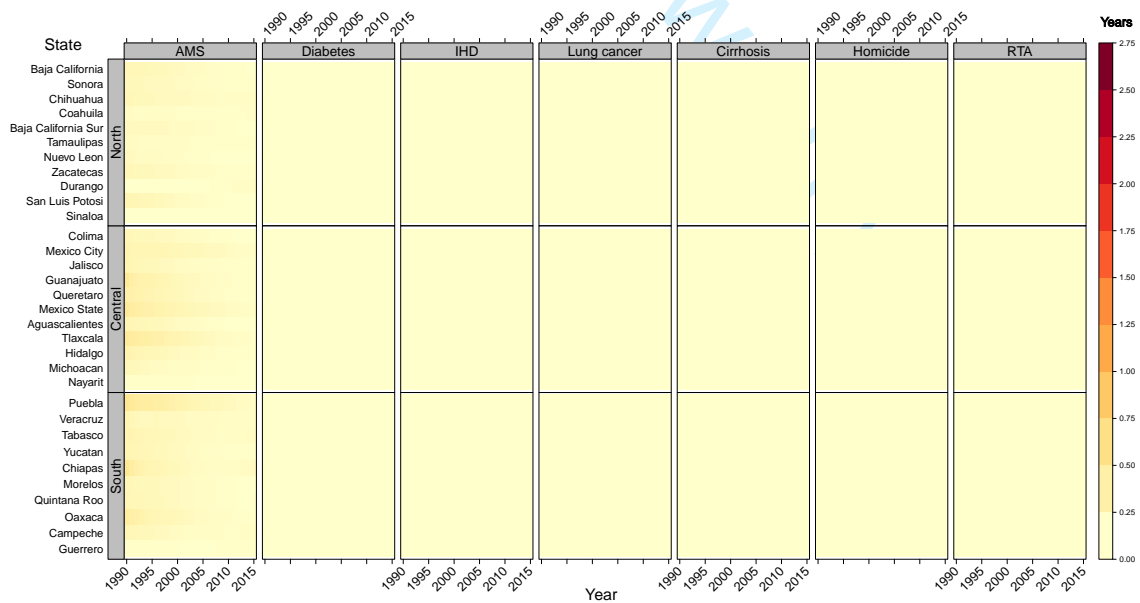

Note: AMS is “amenable to medical service”, IHD is “isquemic heart diseases”, and RTA is “road traffic accidents”. Source: own calculations.

Figure 8: Cause-specific contributions to state differences from low mortality benchmark for male young adults (ages 15-49), 1990-2015.



Note:

AMS is “amenable to medical service”, IHD is “ischemic heart diseases”, and RTA is “road traffic accidents”. Source: own calculations.

Figure 9: Cause-specific contributions to state differences from low mortality benchmark for female young adults (ages 15-49), 1990-2015.



Note:

AMS is “amenable to medical service”, IHD is “ischemic heart diseases”, and RTA is “road traffic accidents”. Source: own calculations.

Figure 10: State specific gap with low mortality benchmark for selected years between ages 0-14. Source: own calculations.

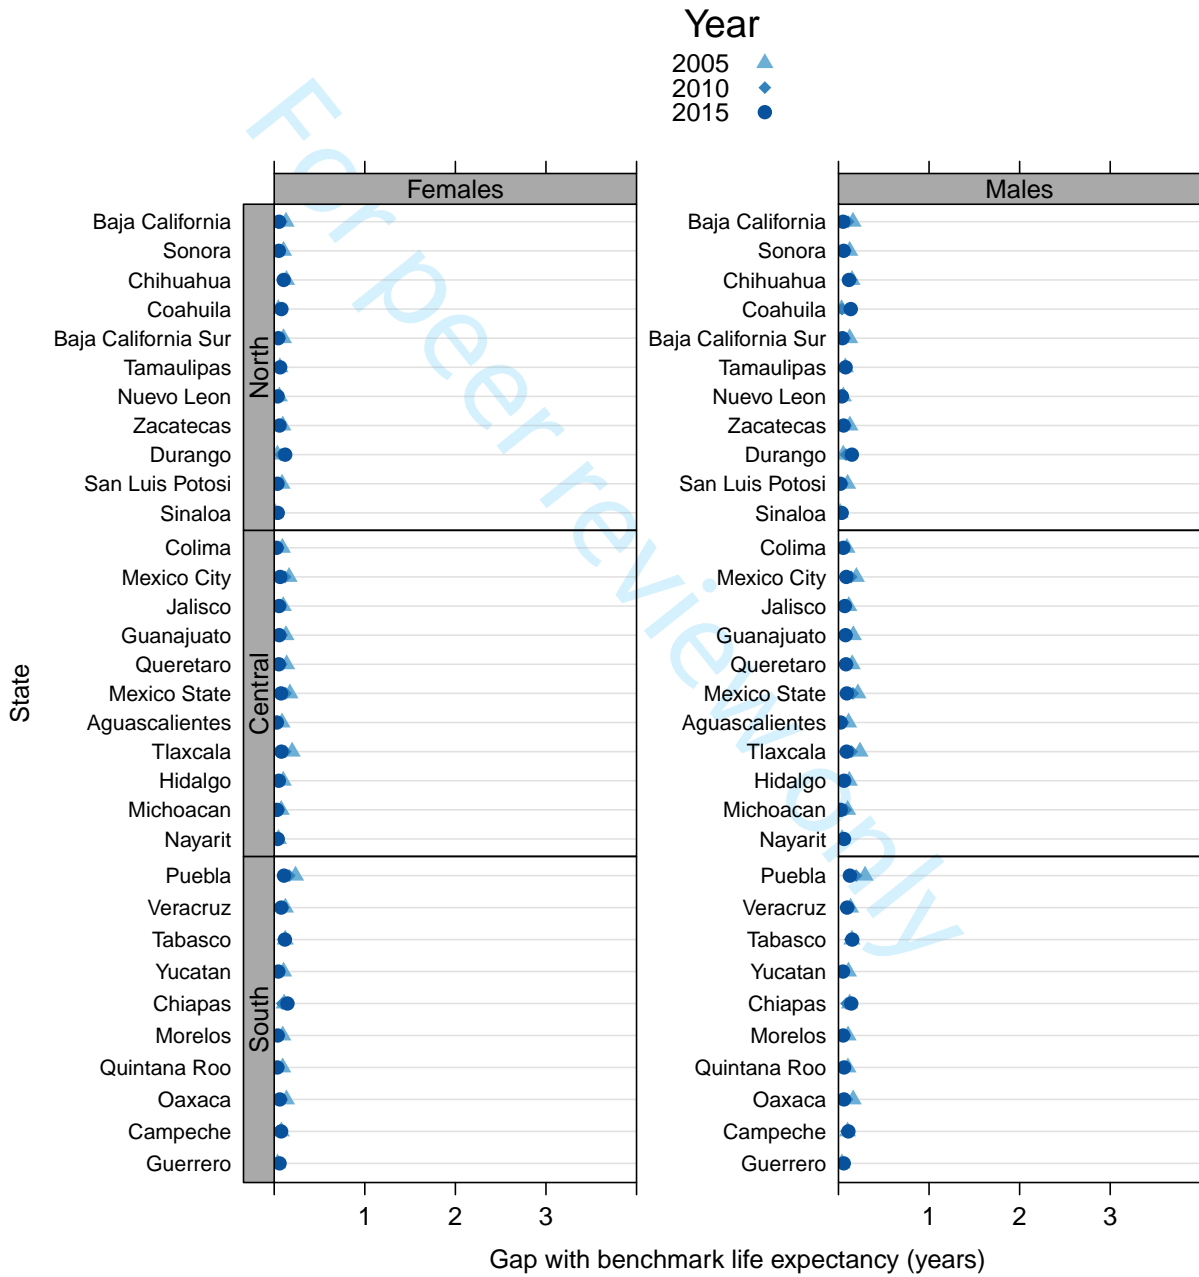

Figure 11: State specific gap with low mortality benchmark for selected years between ages 15-49. Source: own calculations.

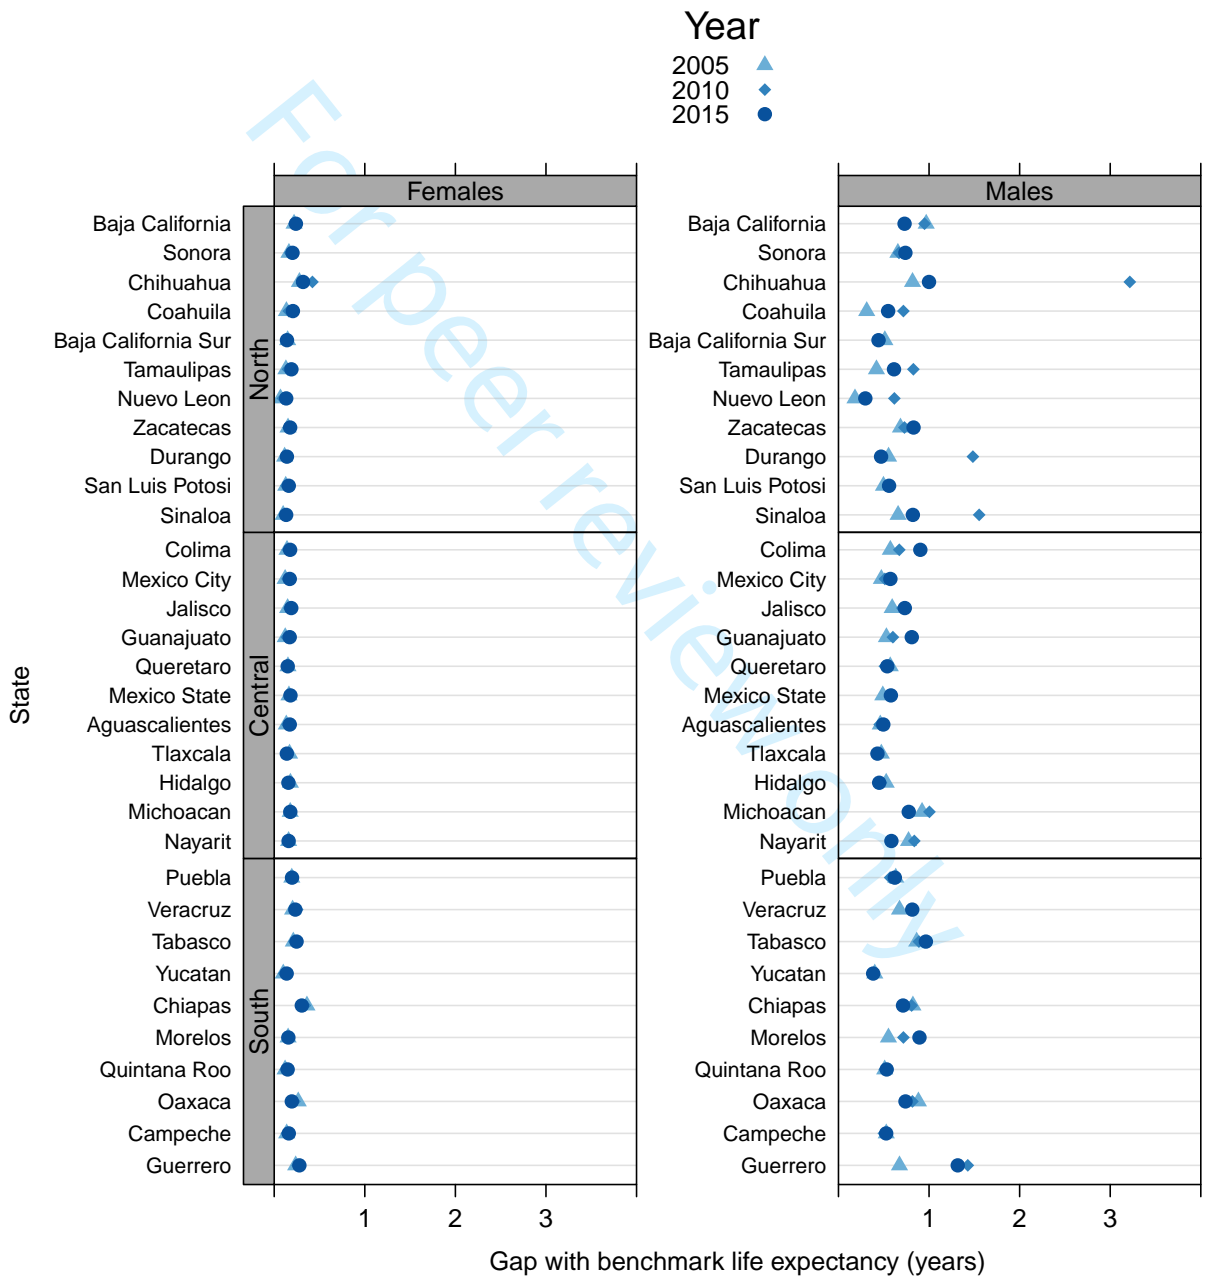

Figure 12: State specific gap with low mortality benchmark for selected years between ages 50-84. Source: own calculations.

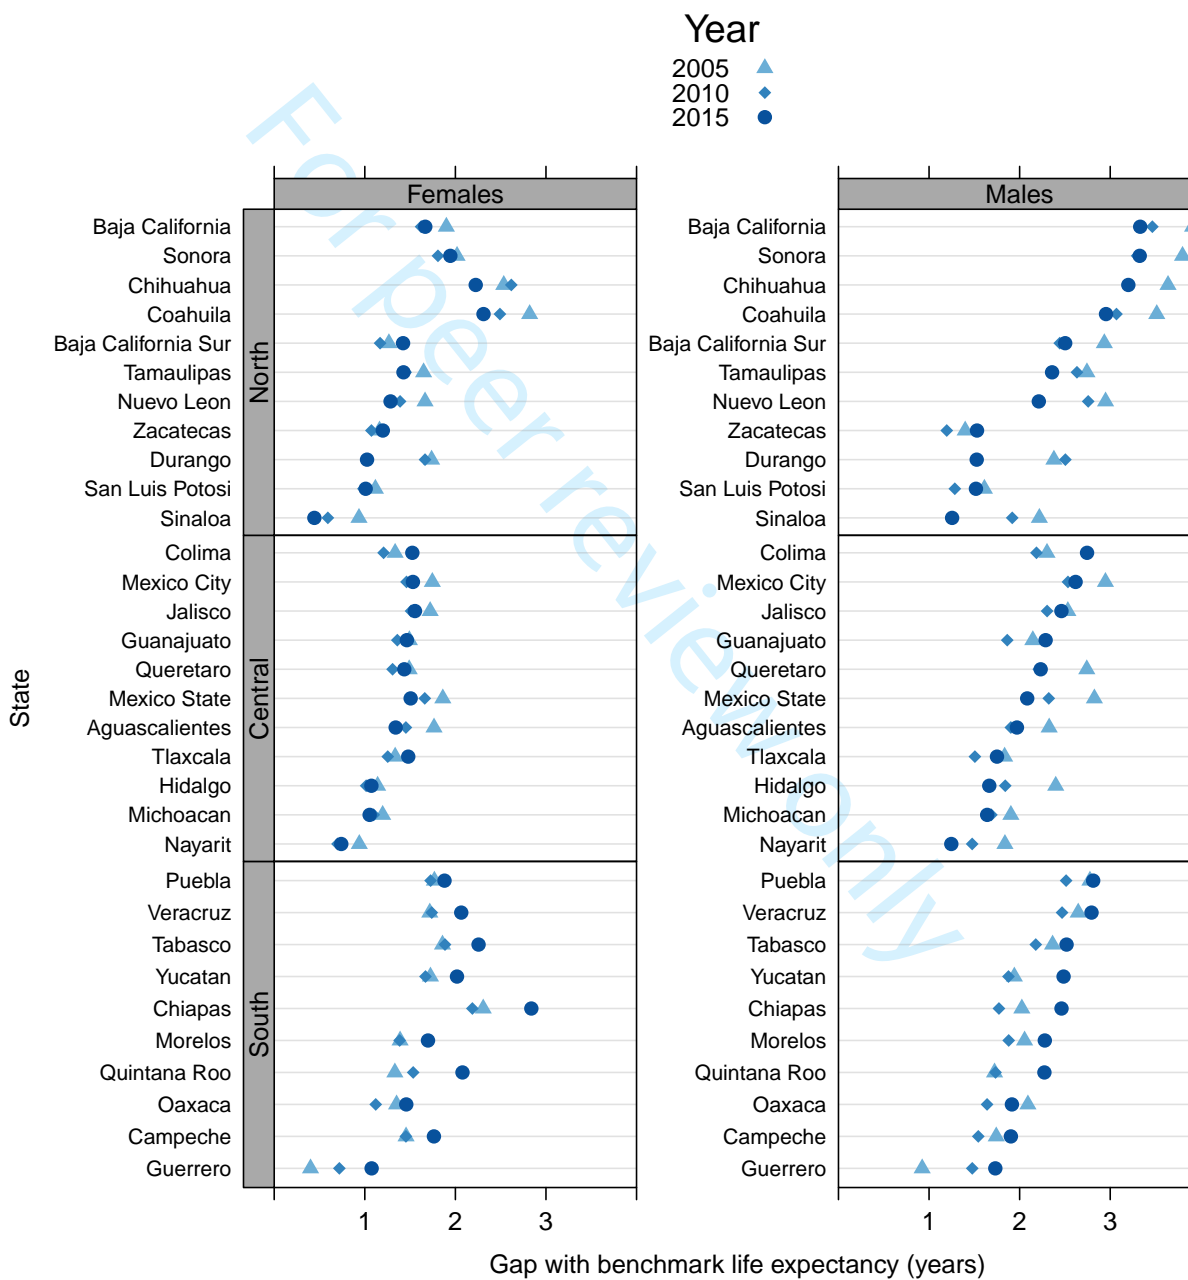

1  
2  
3  
4  
5  
6  
7  
8  
9  
10  
11  
12  
13  
14  
15  
16  
17  
18  
19  
20  
21  
22  
23  
24  
25  
26  
27  
28  
29  
30  
31  
32  
33  
34  
35  
36  
37  
38  
39  
40  
41  
42  
43  
44  
45  
46  
47  
48  
49  
50  
51  
52  
53  
54  
55  
56  
57  
58  
59  
60

Figure 13: Proportion by cause of death from benchmark mortality for youngest females (ages 0-14). Source: own calculations.

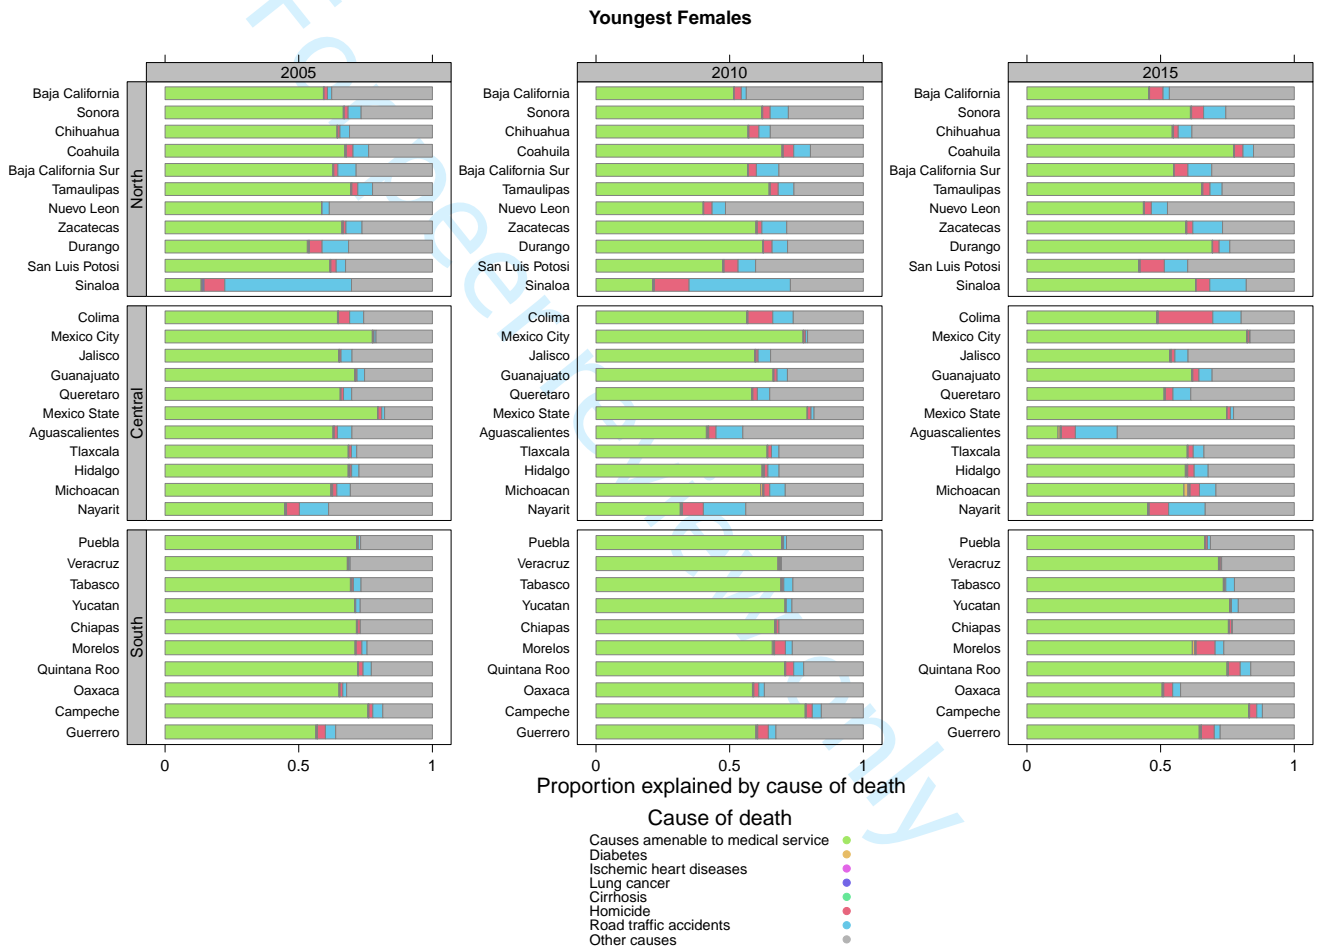

Figure 14: Proportion by cause of death from benchmark mortality for youngest males (ages 0-14). Source: own calculations.

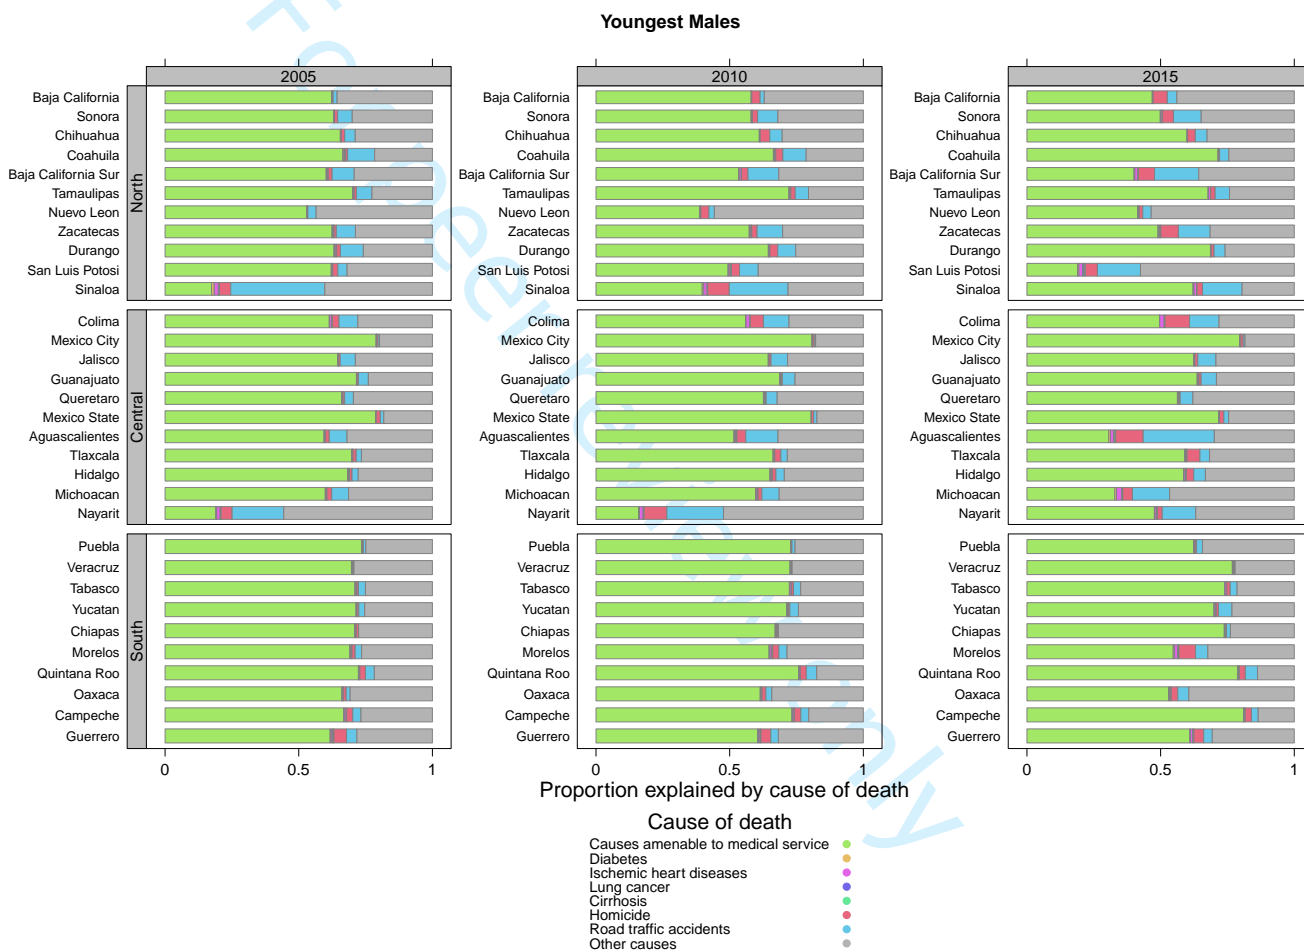



1  
2  
3  
4  
5  
6  
7  
8  
9  
10  
11  
12  
13  
14  
15  
16  
17  
18  
19  
20  
21  
22  
23  
24  
25  
26  
27  
28  
29  
30  
31  
32  
33  
34  
35  
36  
37  
38  
39  
40  
41  
42  
43  
44  
45  
46  
47  
48  
49  
50  
51  
52  
53  
54  
55  
56  
57  
58  
59  
60

Figure 15: Proportion by cause of death from benchmark mortality for young adult females (ages 15-49).  
Source: own calculations.

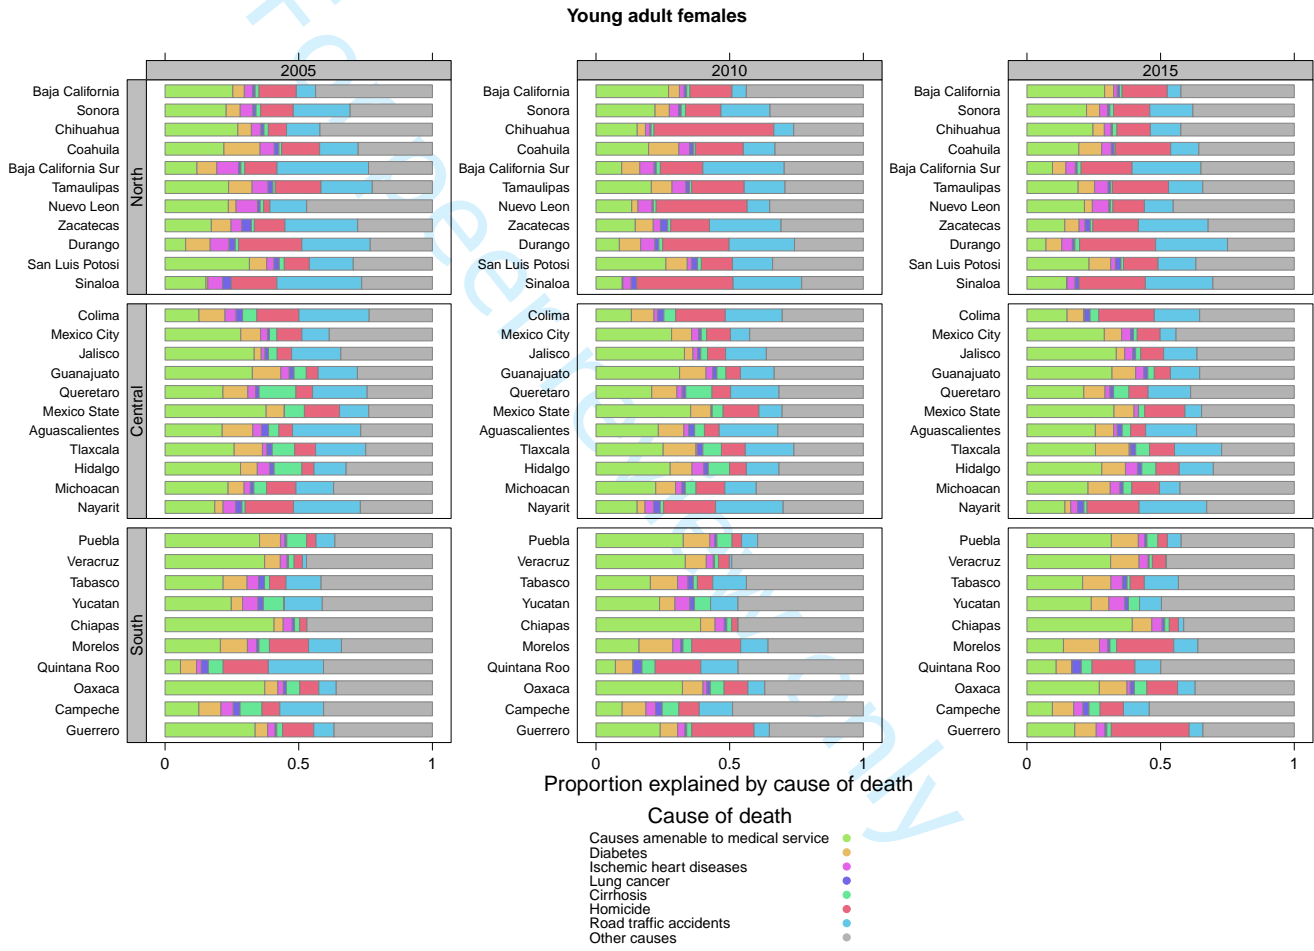

1  
2  
3  
4  
5  
6  
7  
8  
9  
10  
11  
12  
13  
14  
15  
16  
17  
18  
19  
20  
21  
22  
23  
24  
25  
26  
27  
28  
29  
30  
31  
32  
33  
34  
35  
36  
37  
38  
39  
40  
41  
42  
43  
44  
45  
46  
47  
48  
49  
50  
51  
52  
53  
54  
55  
56  
57  
58  
59  
60

Figure 16: Proportion by cause of death from benchmark mortality for young adult males (ages 15-49).  
Source: own calculations.



1  
2  
3  
4  
5  
6  
7  
8  
9  
10  
11  
12  
13  
14  
15  
16  
17  
18  
19  
20  
21  
22  
23  
24  
25  
26  
27  
28  
29  
30  
31  
32  
33  
34  
35  
36  
37  
38  
39  
40  
41  
42  
43  
44  
45  
46  
47  
48  
49  
50  
51  
52  
53  
54  
55  
56  
57  
58  
59  
60

Figure 17: Proportion by cause of death from benchmark mortality for older male adults (ages 50-84). Source: own calculations.

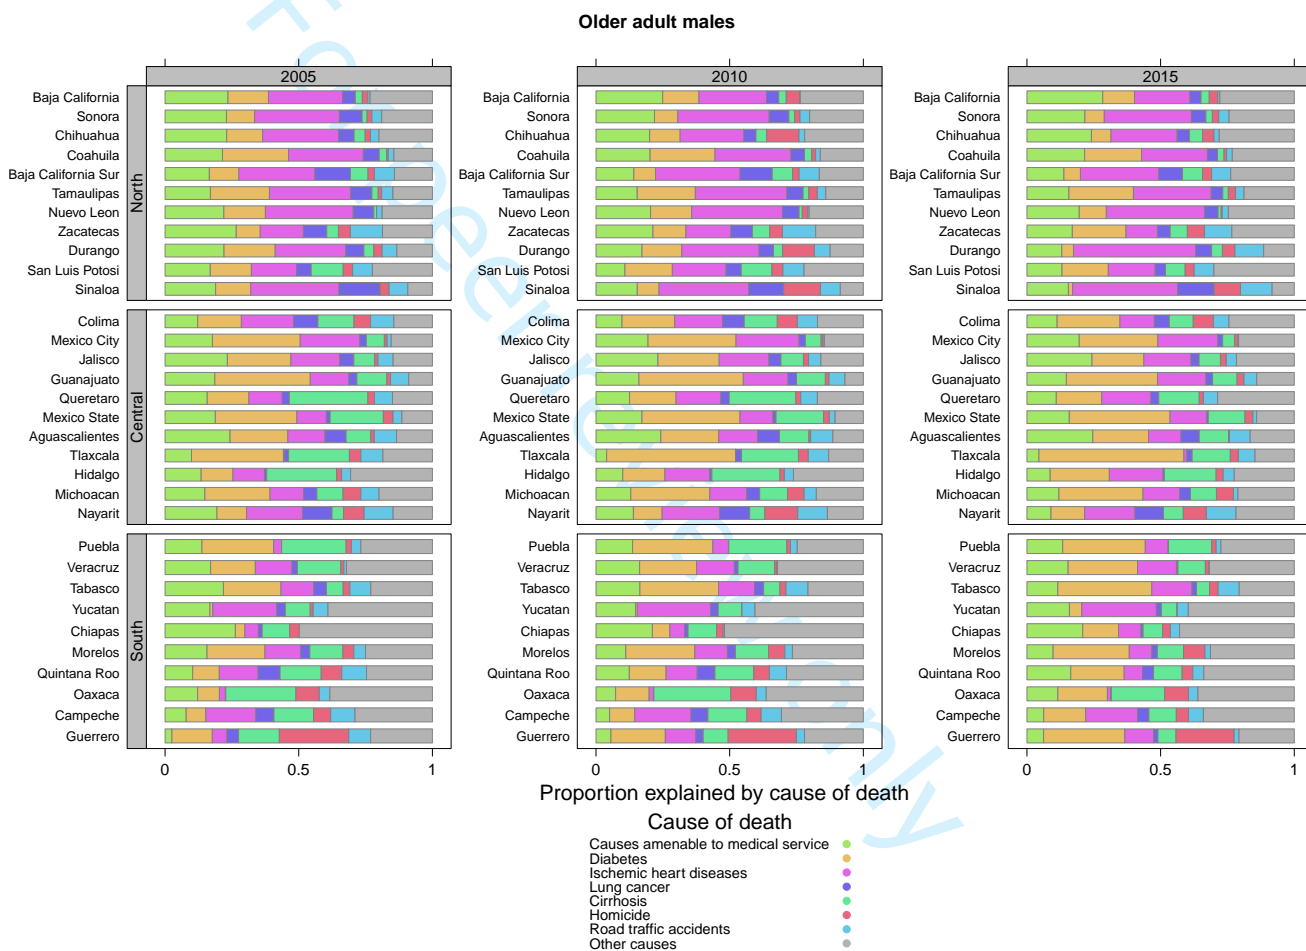

Figure 18: Proportion by cause of death from benchmark mortality for older female adults (ages 50-84).  
Source: own calculations.

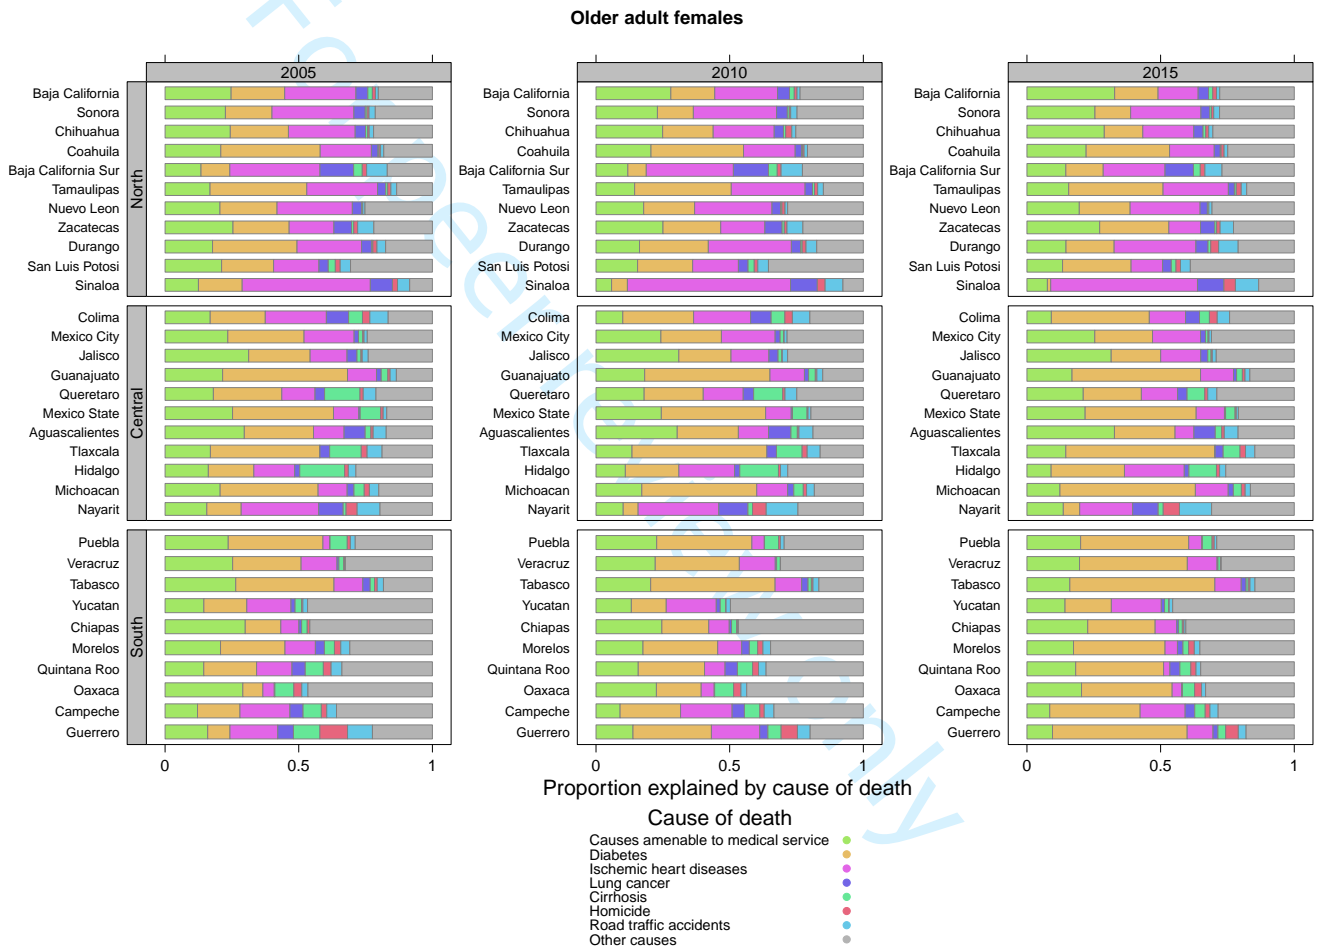

STROBE Statement—Checklist of items that should be included in reports of *cross-sectional studies*

|                              | Item No | Recommendation                                                                                                                                                                                                                                                                                                                                                                                                                                                 |
|------------------------------|---------|----------------------------------------------------------------------------------------------------------------------------------------------------------------------------------------------------------------------------------------------------------------------------------------------------------------------------------------------------------------------------------------------------------------------------------------------------------------|
| <b>Title and abstract</b>    | 1       | (a) Indicate the study's design with a commonly used term in the title or the abstract <b>(done, page 1)</b><br>(b) Provide in the abstract an informative and balanced summary of what was done and what was found <b>(done, page 2)</b>                                                                                                                                                                                                                      |
| <b>Introduction</b>          |         |                                                                                                                                                                                                                                                                                                                                                                                                                                                                |
| Background/rationale         | 2       | Explain the scientific background and rationale for the investigation being reported <b>(done, page 3-4)</b>                                                                                                                                                                                                                                                                                                                                                   |
| Objectives                   | 3       | State specific objectives, including any prespecified hypotheses <b>(done, page 4-5)</b>                                                                                                                                                                                                                                                                                                                                                                       |
| <b>Methods</b>               |         |                                                                                                                                                                                                                                                                                                                                                                                                                                                                |
| Study design                 | 4       | Present key elements of study design early in the paper <b>(done, page 4-6)</b>                                                                                                                                                                                                                                                                                                                                                                                |
| Setting                      | 5       | Describe the setting, locations, and relevant dates, including periods of recruitment, exposure, follow-up, and data collection <b>(done, page 5)</b>                                                                                                                                                                                                                                                                                                          |
| Participants                 | 6       | (a) Give the eligibility criteria, and the sources and methods of selection of participants <b>(Not necessary. We work with aggregated data)</b>                                                                                                                                                                                                                                                                                                               |
| Variables                    | 7       | Clearly define all outcomes, exposures, predictors, potential confounders, and effect modifiers. Give diagnostic criteria, if applicable <b>(done, page 6)</b>                                                                                                                                                                                                                                                                                                 |
| Data sources/<br>measurement | 8*      | For each variable of interest, give sources of data and details of methods of assessment (measurement). Describe comparability of assessment methods if there is more than one group <b>(done, page 5)</b>                                                                                                                                                                                                                                                     |
| Bias                         | 9       | Describe any efforts to address potential sources of bias <b>(done, page 6)</b>                                                                                                                                                                                                                                                                                                                                                                                |
| Study size                   | 10      | Explain how the study size was arrived at <b>(Not necessary. We work with aggregated data)</b>                                                                                                                                                                                                                                                                                                                                                                 |
| Quantitative variables       | 11      | Explain how quantitative variables were handled in the analyses. If applicable, describe which groupings were chosen and why <b>(done, page 5-6)</b>                                                                                                                                                                                                                                                                                                           |
| Statistical methods          | 12      | (a) Describe all statistical methods, including those used to control for confounding <b>(done, page 6-7)</b><br>(b) Describe any methods used to examine subgroups and interactions <b>(done, page 6-7)</b><br>(c) Explain how missing data were addressed (Not applicable [NA])<br>(d) If applicable, describe analytical methods taking account of sampling strategy (NA)<br>(e) Describe any sensitivity analyses <b>(done, page 5)</b>                    |
| <b>Results</b>               |         |                                                                                                                                                                                                                                                                                                                                                                                                                                                                |
| Participants                 | 13*     | (a) Report numbers of individuals at each stage of study—eg numbers potentially eligible, examined for eligibility, confirmed eligible, included in the study, completing follow-up, and analysed <b>(Not necessary. We work with aggregated data)</b><br>(b) Give reasons for non-participation at each stage <b>(Not necessary. We work with aggregated data)</b><br>(c) Consider use of a flow diagram <b>(Not necessary. We work with aggregated data)</b> |
| Descriptive data             | 14*     | (a) Give characteristics of study participants (eg demographic, clinical, social) and information on exposures and potential confounders <b>(done, page 5)</b><br>(b) Indicate number of participants with missing data for each variable of interest                                                                                                                                                                                                          |

stage (**Not necessary. We work with aggregated data**)

|                          |     |                                                                                                                                                                                                                                                                                                                                                                                                                                                                                               |
|--------------------------|-----|-----------------------------------------------------------------------------------------------------------------------------------------------------------------------------------------------------------------------------------------------------------------------------------------------------------------------------------------------------------------------------------------------------------------------------------------------------------------------------------------------|
| Outcome data             | 15* | Report numbers of outcome events or summary measures ( <b>done, pages 7-10</b> )                                                                                                                                                                                                                                                                                                                                                                                                              |
| Main results             | 16  | (a) Give unadjusted estimates and, if applicable, confounder-adjusted estimates and their precision (eg, 95% confidence interval). Make clear which confounders were adjusted for and why they were included ( <b>done, page 7-8 and supplemental material</b> )<br>(b) Report category boundaries when continuous variables were categorized ( <b>NA</b> )<br>(c) If relevant, consider translating estimates of relative risk into absolute risk for a meaningful time period ( <b>NA</b> ) |
| Other analyses           | 17  | Report other analyses done—eg analyses of subgroups and interactions, and sensitivity analyses ( <b>done, page 6-7. 9</b> )                                                                                                                                                                                                                                                                                                                                                                   |
| <b>Discussion</b>        |     |                                                                                                                                                                                                                                                                                                                                                                                                                                                                                               |
| Key results              | 18  | Summarise key results with reference to study objectives ( <b>done, page 11-14</b> )                                                                                                                                                                                                                                                                                                                                                                                                          |
| Limitations              | 19  | Discuss limitations of the study, taking into account sources of potential bias or imprecision. Discuss both direction and magnitude of any potential bias ( <b>done, page 13</b> )                                                                                                                                                                                                                                                                                                           |
| Interpretation           | 20  | Give a cautious overall interpretation of results considering objectives, limitations, multiplicity of analyses, results from similar studies, and other relevant evidence ( <b>done, page 13-14</b> )                                                                                                                                                                                                                                                                                        |
| Generalisability         | 21  | Discuss the generalisability (external validity) of the study results ( <b>done, page 13-14</b> )                                                                                                                                                                                                                                                                                                                                                                                             |
| <b>Other information</b> |     |                                                                                                                                                                                                                                                                                                                                                                                                                                                                                               |
| Funding                  | 22  | Give the source of funding and the role of the funders for the present study and, if applicable, for the original study on which the present article is based ( <b>NA</b> )                                                                                                                                                                                                                                                                                                                   |

\*Give information separately for exposed and unexposed groups.

**Note:** An Explanation and Elaboration article discusses each checklist item and gives methodological background and published examples of transparent reporting. The STROBE checklist is best used in conjunction with this article (freely available on the Web sites of PLoS Medicine at <http://www.plosmedicine.org/>, Annals of Internal Medicine at <http://www.annals.org/>, and Epidemiology at <http://www.epidem.com/>). Information on the STROBE Initiative is available at [www.strobe-statement.org](http://www.strobe-statement.org).
